# Supplementary material for: Identification and Validation of a Major Quantitative Trait Locus for Adult Plant Resistance Against Leaf Rust From the Chinese Wheat Landrace Bai Qimai
Source: Frontiers journal article supplement (doi:10.3389/fpls.2022.812002), 2022-05-18
Supplement: Image_1.pdf [file Image_1.pdf]

## Development of three validating wheat populations

RL6058 was crossed with BQM in May 2015 using BQM as pollen donor. In mid-October 2016, 700 F<sub>2</sub> seeds were sown in 5-mL centrifuge tubes filled with moist soil with a single germinated seed in each tube, and maintained in growth chambers at 5 ± 2 °C with a relative humidity higher than 70%. The DNA samples extracted from these seedlings were subjected to a selection based on the marker *cf188* for *QLr.cau-6DL* and the DNA marker *cssfr5* for *Lr34*. This selection resulted in four groups of QTL combination, namely, the F<sub>2</sub> seedlings with positive states for both *cf188* and *cssfr5* (representing *QLr.cau-6DL* + *Lr34*), positive states for *cf188* and negative states for *cssfr5* (*QLr.cau-6DL*), negative states for *cf188* and positive states for *cssfr5* (*Lr34*), and negative states for both *cf188* and *cssfr5* (None). From each of the four QTL combination groups, 20 F<sub>2</sub> seedlings were kept to the adult plant growth stage and they were self-pollinated in mid-May 2017 to produce F<sub>2:3</sub> family seeds.

Likewise, in mid-October 2016, 100 BC<sub>3</sub>F<sub>2</sub> seeds derived from the cross AK58 × BQM (Figure S1) were sown in 5-mL centrifuge tubes, and DNA samples from these seedlings were selected for *QLr.cau-6DL* based on the marker *cf188*. Five seedlings that were positive for *cf188* (R-group) and another five seedlings that were negative for *cf188* (S-group) were kept to the adult plant growth stage and they were self-pollinated in mid-May 2017 to produce BC<sub>3</sub>F<sub>2:3</sub> family seeds. In the same way, R-group and S-group BC<sub>3</sub>F<sub>2:3</sub> family seeds were obtained from the cross JM22 × BQM (Figure S1).

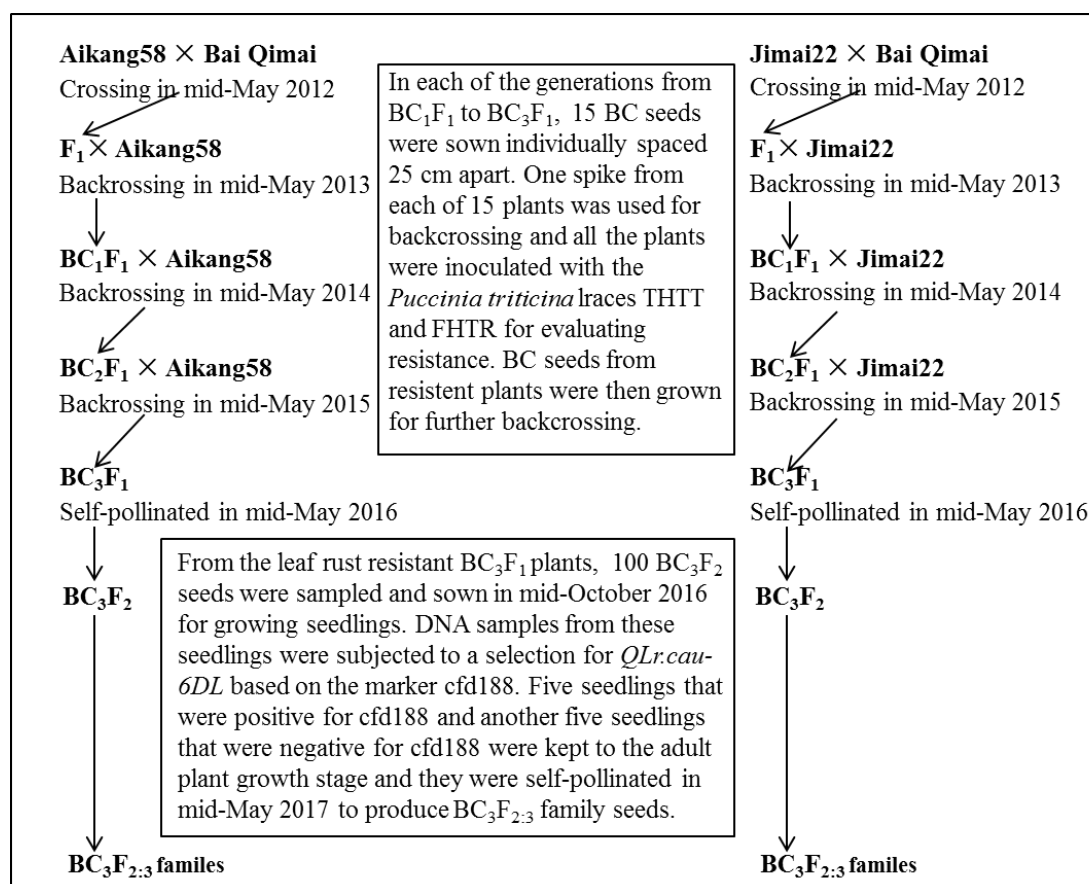

Figure S1. Development of two backcross populations.
