# Supplementary material for: Identification and Validation of a Major Quantitative Trait Locus for Adult Plant Resistance Against Leaf Rust From the Chinese Wheat Landrace Bai Qimai
Source: Front Plant Sci. 2022 May 18;13:812002. doi: 10.3389/fpls.2022.812002 (PMC9158542; doi:10.3389/fpls.2022.812002)
Supplement: Supplementary file 1 [file Table_1.xlsx]

## Sheet: Table S1
	Supplementary Table 1 | Leaf rust severity of the Chinese wheat landrace Bai Qimai and the susceptible check Mingxian169 infected by naturally occurring Puccinia triticina in the field nursery of Southern Gansu Province from 1987 to 2020.
	Year	Bai Qimai			Mingxian 169
		Meana (%)	Std Dev		Meana (%)	Std Dev
	1987	12.6	4.2		89.3	7.1
	1988	15.7	3.8		90.7	6.7
	1989	17.3	4.7		92.1	6.1
	1990	21.8	5.4		95.4	5.2
	1991	18.2	4.1		91.7	4.3
	1992	16.4	5.8		93.8	3.7
	1993	14.3	6.2		88.6	8.2
	1994	16.6	5.6		89.5	6.8
	1995	17.7	5.2		93.9	4.2
	1996	13.8	5.6		91.1	6
	1997	18.8	3.5		95	4.3
	1998	16.6	6.3		94.4	6.8
	1999	14.4	6.3		87.8	7.5
	2000	18.8	3.7		95.6	6.8
	2001	15.5	5.6		92.2	6.2
	2002	19.9	3.8		97.8	3.6
	2003	17.7	2.9		89.4	8.5
	2004	15.5	3.5		93.3	7.1
	2005	14.4	6.3		90	2.3
	2006	16.6	4.5		94.5	2.9
	2007	13.3	5.2		91.2	5.5
	2008	16.6	4.5		88.7	6.1
	2009	18.8	5.6		96.7	1.6
	2010	14.4	4.5		94.4	4.9
	2011	12.2	3.5		85.6	7.2
	2012	22.3	5.2		96.2	2.2
	2013	13.3	5.2		90.6	5.1
	2014	16.6	6.3		88.6	4.5
	2015	13.3	5.2		92.3	4.6
	2016	18.8	5.6		93.1	5
	2017	15.5	4.8		94.3	4.2
	2018	16.6	6.3		95.1	3.5
	2019	17.3	5.2		93.3	3.7
	2020	16.4	4.7		92.7	5.1
	Overall mean	16.4	NAb		92.3	NA
	Minimum	12.2	NA		85.6	NA
	Maximum	22.3	NA		97.8	NA
