# Supplementary material for: Identification and Validation of a Major Quantitative Trait Locus for Adult Plant Resistance Against Leaf Rust From the Chinese Wheat Landrace Bai Qimai
Source: Front Plant Sci. 2022 May 18;13:812002. doi: 10.3389/fpls.2022.812002 (PMC9158542; doi:10.3389/fpls.2022.812002)
Supplement: Supplementary file 2 [file Table_2.XLSX]

## Sheet: Table S2
	Supplementary Table 2 | Leaf rust severities a of the 186 recombinant inbred lines (RILs) from Nugaines × Bai Qimai infected by naturally occurring Puccinia triticina during 2015–2017 in Gansu (2015GS, 2016GS, and 2017GS) and Shandong (2015SD, 2016SD, and 2017SD).
	Wheat line/RIL	Replicate	2015GS				2016GS				2017GS				2015SD				2016SD				2017SD
			Severity_1st	Severity_2nd	Severity_3rd	AUDPC b	Severity_1st	Severity_2nd	Severity_3rd	AUDPC b	Severity_1st	Severity_2nd	Severity_3rd	AUDPC b	Severity_1st	Severity_2nd	Severity_3rd	AUDPC b	Severity_1st	Severity_2nd	Severity_3rd	AUDPC b	Severity_1st	Severity_2nd	Severity_3rd	AUDPC b
			May, 23	June, 4	June, 14		May, 25	June, 6	June, 17		May, 21	June, 2	June, 11		May, 13	May, 23	June, 2		May, 11	May, 22	May, 31		May, 14	May, 25	June, 3
	Bai Qimai	1	1.2	7.1	15.8	164.3	1.3	5.4	17.4	165.6	1.5	6.9	18.2	163.4	0.8	5.6	19.2	156	2.6	6.9	23.5	189.1	0.5	5.7	19.6	148
		2	0.8	7	17.4	168.8	0.8	6.7	17.5	178.1	2.1	8.2	17.7	178.4	1.1	6.1	18.7	160	3.1	6.1	22.3	178.4	0.8	6.3	21.1	162.4
		3	1.4	6.3	16.9	162.2	1.1	6.1	16.3	166.4	1.3	7.6	17.4	165.9	1.5	4.8	20.5	158	1.9	6.4	22.4	175.3	1	5.8	20.3	154.9
	Nugaines	1	9.6	42.5	93.2	991.1	11.7	37.8	89.7	998.3	8.8	47.6	92.1	967.1	10.2	40.3	89.1	899.5	7.7	45.7	90.8	908	10.5	46.4	85.2	905.2
		2	10.7	40.2	88.5	948.9	9.4	37.7	92.8	1000.4	7.9	49.1	89.7	966.6	9.9	42.6	91.6	933.5	10.3	42.9	87.9	881.2	15.6	46.1	81.6	914
		3	8.8	43.3	89.3	975.6	8.9	35.7	91.2	965.6	10.2	44.6	90.6	937.2	9.6	44.5	89.2	939	6.7	48.2	89.8	923	13.8	43.8	84.2	892.8
	Mingxian169	1	9.5	47.8	91.8	1041.8	10.6	52.1	92.3	1170.4	18.3	51.3	91.2	1058.9	15.3	53.3	85.8	1038.5	20.3	52.1	91.2	1043.1	16.9	54.3	83.8	1013.1
		2	12.2	46.5	89.3	1031.2	12.1	50.3	89.7	1144.4	12.7	54.8	88.7	1050.8	10.4	55.8	91.3	1066.5	17.3	53.1	88.3	1023.5	25.2	52.1	85.7	1045.3
		3	9.6	50.7	89.4	1062.3	9.6	53.4	91.4	1174.4	20.4	49.6	91.7	1055.9	12.3	53.2	89.1	1039	14.2	56.2	89.2	1041.5	17.8	50.5	84.7	984.1
	1	1	1.5	1	11.3	76.5	2.4	0.3	18.1	117.4	1.5	2.1	6.8	61.4	2.8	3.7	12.4	112.9	2.7	1	6.7	54.9	1.2	3.5	7.7	76.3
	1	2	1	1	4.7	40.7	2.1	2.3	10.2	95.3	2	0.7	6.4	48.2	2.2	1	7.7	59.5	1	0.8	6.2	41.2	1.2	1.4	3.9	38.1
	1	3	2	1	8.3	64.2	2.2	2.2	11.2	100.2	1.7	2.3	5	56.7	1.9	2.9	9.6	86.4	1.3	1	7.8	52.5	1.2	0.9	8.4	53.4
	2	1	1.5	1.1	11.3	77.8	4	5.2	15.3	167.8	1.7	2.2	9.2	74.9	1.7	3.5	7.2	79.3	4	4.6	12	122	2	4	9	91.5
	2	2	1	1	2.4	29.1	2.6	5	6	106	1.2	0.7	6.7	44.6	1.7	2.3	5	56.4	1.6	1.8	5.2	50.3	1	1	1.6	22.9
	2	3	1.3	1	8.4	60.9	2.7	5	11.6	137.7	1.3	2.3	10	77	2.2	2.5	17.5	123.4	2.7	3.9	15	121.3	1.2	3.5	7.7	76.3
	3	1	6	13.3	50	432.5	2.2	15	33.2	368.4	7	6.7	38.3	284.6	5.7	26.7	52.1	556	4.5	13.3	26.7	278	3.7	11.7	46.7	347.5
	3	2	1.6	8.3	18.1	191.3	4.2	6.7	20	212	6.8	13.3	53.3	420.1	5.8	13.2	35	335.9	6.2	6.7	36.7	266.4	3.7	8.1	16.1	173.8
	3	3	4.4	8.3	33.3	284.2	3.8	8.3	16.1	206.6	7	16.6	43.3	411.4	7.7	8.3	38.3	312.9	3.5	6.6	26.4	204.2	3.7	8.1	16.1	173.8
	4	1	6.9	33.3	65	732.6	7	25	55.7	635.9	6.6	24.8	56.8	555.6	7.3	23.1	60	567.6	4.2	14.9	41.6	359.1	5.2	26.9	49.7	521.3
	4	2	.	.	.	.	5.5	10	46.7	404.8	3.6	16.7	30	332	5.7	6.6	33.2	260.6	7	5	33.1	237.5	3.7	5	29.4	202.7
	4	3	3.9	11.7	46.7	385.7	6.8	18.2	61.7	589.3	5.7	13.1	43.3	366.3	6.6	16.7	46.7	433.8	4.1	8.4	30	241.4	7.2	17.9	41.5	405.4
	5	1	2.7	3.7	11.7	115.6	3.6	3.8	19.5	172.3	2.4	7	17.8	167.7	1.4	3.4	10.1	91.5	2.3	5	9.8	106.8	2	5.2	16.5	137.3
	5	2	3	3.7	10	108.5	3.1	3.7	17.4	157.1	3.3	3.7	13.1	117.8	1.2	3.1	6.3	68.3	2.3	5	9.8	106.8	2.3	5	9.8	106.8
	5	3	2.7	3.7	10	106.9	3.6	3.6	15.3	147	2.7	3.7	22.7	157.1	2.3	3.5	6.8	80.4	2.1	2.2	12.8	91.2	4	4.6	12	122
	6	1	2.9	3.7	13.3	124.4	4.8	5.3	18.3	190.6	1.1	3.3	5.1	64.2	1.7	2.8	9.2	82.4	3.5	3.7	15.3	125.1	1.2	3.5	7.7	76.3
	6	2	2.1	2.3	10.3	89.1	2.8	8.3	23.1	239.4	2.3	6.8	8.8	124.9	2.7	3.5	10.4	100.7	2.4	2.6	23.2	143.4	1.2	3.5	7.7	76.3
	6	3	3.3	8.3	14.1	181.7	4.8	10	20	253.6	2.4	0.4	18.1	100.1	3.7	3.8	19.7	155.2	5.6	6.5	28.2	222.8	2	5.2	16.5	137.3
	7	1	3	2.3	13.5	110.8	2.5	2.3	23.2	169.3	3.5	4.8	16.6	146.3	1.2	3.1	6.3	68.3	2	5.4	10.6	112.9	2.3	5	9.8	106.8
	7	2	2.3	2.3	11.5	96.8	2.9	3.7	21.5	178.4	1.8	2.6	9.8	82.1	1.7	1.6	5.1	50	2.3	5	9.8	106.8	1.2	3.5	7.7	76.3
	7	3	2.7	3.7	10	106.9	3.3	6.7	18.3	197.3	1.1	3.3	5.6	66.4	1.2	1.4	6.7	53.6	3.3	4.9	16.4	141.1	2	4	9	91.5
	8	1	2.2	2.3	9.2	84.4	2.7	5	11.6	137.3	1.9	4.8	10.1	107.1	2.5	5	21.7	170.8	4	4.6	12	122	2	4	9	91.5
	8	2	2.3	4.9	10.1	118.2	3.1	4.8	15.3	157.9	2.1	2.3	4.9	58.9	3.6	2.4	22.4	154	1.7	2.8	8.3	74.7	1.2	0.9	8.4	53.4
	8	3	3	2.3	11.7	101.6	2.9	5	14.3	153.3	2.6	2.3	8.1	76.1	4.3	6.8	20	189.5	2.2	4.7	10.2	104.9	2.3	5	9.8	106.8
	9	1	7.2	12.5	51.7	439.1	5.4	18.1	61.8	580.3	5.7	21.5	41.6	447.2	8.5	30	86.7	776.1	5.2	16.7	46.6	405.4	5.2	26.9	49.7	521.3
	9	2	7.2	17.5	50	485.5	4.8	15	41.1	427.4	5.2	11.7	35	311.7	7	34.1	56.8	660.3	4.2	14.9	41.6	359.1	7.4	5	44.2	289.6
	9	3	4.4	8.3	33.3	284.2	7	5	32.4	277.8	4.3	16.7	40	381.1	8.4	26.7	73.3	675.7	4.2	9.5	30	253.2	4.9	6.8	36.8	260.6
	10	1	6	30	64.5	688.5	6.8	26.6	58.3	667.2	7	13.3	50	406.6	6.8	26.5	46.8	532.8	6.8	10.7	40	324.3	5.3	18.3	55.8	463.3
	10	2	7	23.3	43.3	514.9	7.8	26.5	56.8	663.7	5.7	21.5	41.6	447.2	7.2	18.5	41.5	428.6	5.2	16.7	46.6	405.4	5.2	26.9	49.7	521.3
	10	3	6.3	30	64.5	690.2	7.2	34.2	56.8	748.5	4.3	21.6	41.7	440.3	7.3	28.2	73.2	684.8	7	10.3	36.7	306.7	5.2	26.9	49.7	521.3
	11	1	2.7	3.7	11.7	115.6	2.7	3.7	22.8	184.5	3.3	3.7	13.1	117.8	1.4	3.4	10.1	91.5	2.3	5	9.8	106.8	2	5.2	16.5	137.3
	11	2	3.8	5	13.1	143.3	4.2	6.7	20	212	2.3	2.3	20.9	132	4.4	5.2	16.3	155.6	4.8	5.3	18.3	161.7	5.4	4.9	19.8	167.8
	11	3	1.3	2.4	8.3	75.9	2.2	4.8	13.1	140.8	3.3	2.8	8.3	86.7	4.5	5	11.8	131.4	1.8	2	6.6	59.4	2	4	9	91.5
	12	1	3.1	8.3	31.7	268.5	6.4	11.6	41.7	401.4	7.4	28.3	73.2	670.9	6.4	6.7	30	249	2.2	6.7	24.9	191.1	4.9	6.8	36.8	260.6
	12	2	7.5	26.7	61.7	647.3	7.6	14.9	66.7	583.8	7.8	41.6	73.3	813.2	4.5	15	35	347.5	6.2	19.9	46	440.2	5.3	18.3	55.8	463.3
	12	3	8.2	23.3	85	730.8	5	18.3	56.5	551	7.6	41.7	63.3	768.1	4.4	9.8	56.1	400.6	4	8.3	41.3	291	5.3	18.3	55.8	463.3
	13	1	4.8	5.3	18.3	178.2	3.9	4.5	28.8	233.3	3.7	8.3	16.1	182	3	4.5	11.8	119	4.4	5.2	16.3	149.5	2	5.2	16.5	137.3
	13	2	1	3.5	5.1	69.7	3	3.7	10	115.9	2.7	4.6	6.3	92.8	1.4	2.2	8.8	73.2	4	4.6	12	122	2.7	1.6	6.7	61
	13	3	1.8	1.1	6.7	56.7	2.7	5	11.6	137.7	2	7.3	16.2	161.7	2.5	2.2	12.8	98.3	4	5.4	25	188.4	1.2	3.5	7.7	76.3
	14	1	2.2	5	13.3	134.8	3	3.7	10	115.9	2.8	8.3	15	171.3	1	3.3	5.8	67.1	1.4	2	8.8	67.1	2.7	1.6	6.7	61
	14	2	4.3	5	16.7	164.6	2.7	3.7	9.2	109.1	4.4	5	16.2	151.7	1	3.4	5.9	68.6	2.1	2.1	8	68.6	1.2	0.9	8.4	53.4
	14	3	2.7	3.7	10	106.9	1.6	2.3	20.8	150.4	2.9	8.3	23.4	210	1.1	3.2	5.6	65.7	1.1	1	3.9	33.6	1	1	6.7	45.8
	15	1	6.8	16.7	51.7	483.3	4.4	20	58.2	576.8	5.3	19.5	55.8	487.9	3.5	18.2	52.7	463.3	5.7	26.7	52.1	532.8	5	27.4	61.7	579.2
	15	2	3.7	6.7	25	220.7	4	8.3	41.5	347.5	5.5	5	29.1	216.8	4.5	15	35	347.5	5.7	5.1	33.2	231.7	5.6	7.4	28.2	231.7
	15	3	3.8	8.3	26.7	247.7	4.6	12.4	43.4	408.7	5.7	8.3	33.2	270.8	1.8	9.5	25.3	230.5	5.2	10	26.6	248.3	7.4	5	44.2	289.6
	16	1	4.1	18.3	53.3	492.8	8.4	25	65	695	7	13.3	50	406.6	7	13.2	50	417	6.2	19.9	46	440.2	5.3	18.3	55.8	463.3
	16	2	6.9	11.7	43.3	386.9	2.9	10	30	297.1	4.1	8.4	30	248	3.8	6.8	25	212	3.6	5.1	31.4	212	7	5	33.1	237.5
	16	3	.	.	.	.	7.4	22.6	68.2	679.6	5.6	15	30	326	6	16.6	60	495.8	5.7	15	36.7	346.3	5.3	18.3	55.8	463.3
	17	1	6.4	15	35	378.1	7	16.7	46.2	488.2	3.6	16.7	30	332	1.8	8.2	17.7	179.5	3	15	41.5	353.3	3.7	5	29.4	202.7
	17	2	5	5.3	25	213.3	5.5	10	46.7	404.8	1.7	9.5	25.3	223.6	6.1	6.7	46.5	330.1	7.5	15	66.9	492.3	3.7	5	29.4	202.7
	17	3	2.8	3.7	26.7	190.8	6.1	15	43.3	447	2.9	9.8	16.6	195.2	4.2	5.4	25	200.3	5.8	26.1	58.3	555.3	5.6	7.4	28.2	231.7
	18	1	3	10	16.7	211.9	2.8	2.2	35	234.9	2.7	5.7	13.2	135.6	2.2	4.7	12.8	122	4	4.6	12	122	5.2	6.4	13.3	152.5
	18	2	2.6	5	6.8	104.6	1.6	5	11.3	129.6	1.3	3.3	5	65	2.7	3.5	10.4	100.7	2.7	1	6.7	54.9	1.2	3.5	7.7	76.3
	18	3	5.4	5	20	187.1	3.8	8.3	16.1	206.6	1.7	2.8	9.2	81	2	5.4	15.8	143.3	1.9	4	8.1	86.9	3.3	5.2	9.8	114.4
	19	1	5.1	31.7	45	604.6	7.3	23.1	60	639.4	6.3	24.8	48.2	515	3.3	13.7	30	303.5	6.2	19.9	46	440.2	5.3	18.3	55.8	463.3
	19	2	8.5	23.3	65	632.6	3	18.3	46.3	483	5.7	21.5	41.6	447.2	5.8	13.2	35	335.9	6.2	6.7	36.7	266.4	7.4	5	44.2	289.6
	19	3	8.2	21.7	76.4	669.9	7.6	34.5	60	772.2	5	14.7	40	364.4	6.2	11.6	53.4	414.2	5	12.8	53.3	395.3	7.3	24	60	550.2
	20	1	6	30	64.5	688.5	6.8	26.6	58.3	667.2	6.7	25	83.3	677.6	5.7	26.7	52.1	556	6.9	20.1	55	486.5	5.3	18.3	55.8	463.3
	20	2	7	23.3	43.3	514.9	5.4	16.7	50.8	503.9	7.1	30	50	582.8	6.1	26.7	63.3	613.9	5.2	16.7	46.6	405.4	7.2	17.9	41.5	405.4
	20	3	8.1	30	86.7	812	6.4	30	63.3	731.6	8.3	24.6	90	713.3	7.5	38.4	65	746.7	8.3	23.4	76.5	623.9	5	27.4	61.7	579.2
	21	1	3.2	6.7	18.3	184.6	5.6	5	33.3	274.5	5.6	17.8	58.8	485.2	6.9	13.2	45	391.5	4	4.4	15.7	136.7	2.4	3.3	23.2	150.6
	21	2	5.8	8.3	23.3	242.7	5	6.7	20	217.2	6.9	11.7	43.3	359.1	6.1	6.7	46.5	330.1	4.4	5.4	20	168	2	4.3	7.3	86.9
	21	3	6.6	8.3	55	406	4.3	6.7	26.7	249.5	6.7	30	69.7	668.9	6	25	63.7	598.6	2.4	5	26.6	182.9	3.7	8.1	16.1	173.8
	22	1	3.6	3.7	20	162.3	3.8	3.7	23.3	193.7	3.4	6.8	18.4	174.9	2.8	3.7	12.4	112.9	4.4	5.2	16.3	149.5	2.3	5	9.8	106.8
	22	2	3.6	5	16.8	160.8	3.7	3.8	19.8	174.6	5	5.3	25	198.1	1.9	4.8	10.1	108.3	3.3	5.2	9.8	114.4	2.5	2.5	13.4	99.1
	22	3	3.2	3.7	18	149.7	3.3	4.9	15.7	162.7	3.5	5	31.5	215.1	2.1	2.2	8	72.4	2.2	4.5	20.6	149.7	2.3	5	9.8	106.8
	23	1	3.2	8.3	11.8	169.7	2.8	5	19.5	181.5	3.4	3.6	11.6	110.6	5.4	4.8	19.8	173.9	5.4	4.9	19.8	167.8	2.3	5	9.8	106.8
	23	2	2.5	6.7	23.3	205.3	3.1	3.7	17.4	157.1	2.3	6.8	8.8	124.9	3.4	8.1	16.4	180	3.5	4.9	24.8	180	2.3	5	9.8	106.8
	23	3	5	11.7	21.7	267.3	3.7	5	33.3	262.8	2.4	2.5	23.2	145.2	6	6.7	33.1	262.7	6.5	5.3	28.1	215	2.5	4.9	26.7	183
	24	1	5.5	10	46.7	376.6	7.2	22.3	73.2	702	7.8	23.3	61.7	569.2	4.9	10	40	324.3	5.3	18.3	55.8	463.3	3.7	11.7	46.7	347.5
	24	2	5	8.3	51.7	379.5	7.2	17.5	49.7	517.8	6.2	23	70	593.6	3.6	11.7	46.7	368.4	7.9	17.2	70	530.5	3.5	8.2	36.7	266.4
	24	3	6.3	6.7	46.7	345.1	5.6	23.3	53.3	594.8	8	31.6	68.3	687.4	3.7	8.3	26.2	232.8	6.3	16.7	46.7	411.6	3.7	5	29.4	202.7
	25	1	5	10	56.1	420.7	6.5	16.7	54.7	531.7	7.1	30	50	582.8	6.1	20	62.8	544.4	7.4	5	44.2	289.6	7.2	17.9	41.5	405.4
	25	2	2.7	3.7	19.5	154.5	4.3	5	11.7	147.7	4.3	18.2	61.7	494.7	6.1	19.4	35	399.6	.	.	.	.	2	4.3	7.3	86.9
	25	3	5.7	16.7	41.7	426.3	6.2	15	46.5	465.3	7.6	41.7	63.3	768.1	6.4	30	64.5	654.5	5.7	15	36.7	346.3	5.3	18.3	55.8	463.3
	26	1	8	46.8	88.4	1004.8	9.1	26.7	73.3	764.5	7.8	41.6	73.3	813.2	8.2	36.6	90	857.2	8.7	27.3	88.3	718.2	7.9	35.9	65	695
	26	2	8.7	43.3	70.8	882.7	7	18.4	55	556	7.3	15	51.6	433.7	8.6	26.9	58.1	602.3	5.3	18.3	55.8	463.3	5.3	18.3	55.8	463.3
	26	3	7.1	36.7	65	771.4	4.4	13.3	46.4	434.7	7.1	29.9	75	694.1	6.7	23.3	52.8	530.6	9	42.1	90	875.4	3.7	11.7	46.7	347.5
	27	1	7.6	15	66.7	544.3	5.1	16.7	46.7	479.6	7.3	15	51.6	433.7	6.3	16.7	48.3	440.2	6	8.3	61.7	393.8	3.7	11.7	46.7	347.5
	27	2	7	23.3	43.3	514.9	3	18.3	46.3	483	2.9	10	30	257.5	5	16.7	33.4	359.1	4.2	10.2	41.7	312.8	7.4	5	44.2	289.6
	27	3	7.1	36.7	65	771.4	5.2	19.8	61.7	598.4	5.7	23.3	59.7	547.6	5.2	25	50	526.1	4.9	19.7	53.3	463.8	5.2	26.9	49.7	521.3
	28	1	8.5	28.3	75	737	6.7	28.4	67.9	740.2	6.6	26.4	83.2	691.2	8.7	26.8	88.3	752.9	5.2	26.9	49.7	521.3	8.4	26.1	73.3	637.1
	28	2	7.2	17.5	50	485.5	5.5	21.3	60	608.1	5.4	18.2	61.8	501.5	6.8	17.9	61.7	521.3	7.1	23.3	45.1	474.9	5.2	26.9	49.7	521.3
	28	3	6.3	16.7	45	446.6	7	26.6	53.3	641.3	4.5	13.1	40.3	345.9	7.3	28.2	73.2	684.8	6.3	16.3	45	400.2	5.2	26.9	49.7	521.3
	29	1	1.5	2	10	80.8	3.1	5	10	131.2	1.8	2.6	9.8	82.1	1	3.3	5.8	67.1	2	5	9.5	103.7	2	4	9	91.5
	29	2	2.8	3.7	13.3	124	2.1	5	20	180	3.6	4.9	10.7	121.3	1.3	3.3	4.9	64.1	1.9	3	7.3	73.2	2	4	9	91.5
	29	3	1.3	2.3	8.3	74.8	3.5	2.3	23.3	175.4	1.7	1.1	6.7	52.1	2	0.7	6.4	49	1.9	2.8	7.3	71	1.2	3.5	7.7	76.3
	30	1	5.8	13.3	36.7	364.8	6.3	16.6	45	476.1	6.6	24.8	56.8	555.6	5	16.7	33.4	359.1	5.2	26.9	49.7	521.3	7.2	17.9	41.5	405.4
	30	2	5.8	13.3	43.3	397.2	2.9	8.3	23.1	239.8	5.4	18.2	61.8	501.5	4.2	10	38.3	312.8	6.2	6.7	36.7	266.4	3.7	8.1	16.1	173.8
	30	3	3.9	11.7	46.7	385.7	2.1	10	21.7	247.2	7.2	16.3	68.3	521.7	2.9	5.9	13.1	139.1	3.3	6.6	23	187.8	2.2	4	20.6	144.8
	31	1	6.4	16.7	55	497.2	6.2	23.1	70	688.1	6.3	24.8	48.2	515	6.8	26.5	46.8	532.8	9.1	35.9	58.4	671.8	5	27.4	61.7	579.2
	31	2	6.3	6.7	48.3	353.1	5.4	16.7	50.8	503.9	5.2	11.6	53.3	393	6	20	35	405.4	5.2	16.7	46.6	405.4	7.2	17.9	41.5	405.4
	31	3	4.2	15	35	365.4	3.7	18.3	52.7	522.7	4.4	13.3	23.2	270.5	3.4	16.7	53.3	450.5	8	32.3	88.3	764.4	6.9	13.6	45	376.5
	32	1	3.4	18.3	33.3	388.4	5.6	23.3	58.3	622	7	6.7	38.3	284.6	4.7	6.6	40	289.6	5.2	16.7	46.6	405.4	7.4	5	44.2	289.6
	32	2	7.3	21.7	45	507.5	5.2	16.7	58.3	543.8	3.6	16.7	30	332	3.1	3.7	23.1	168	6.1	16.6	59.9	469.1	3.7	5	29.4	202.7
	32	3	7	11.7	26.7	304.5	7	26.6	50	623.1	6.5	11.7	43.3	356.7	3	15	41.7	373.4	8.2	45.3	76.6	842.8	7.4	5	44.2	289.6
	33	1	3.2	5	20.4	176.3	4.2	5	22.7	207.4	2.5	4.9	18.6	149.9	3.5	6.8	19.5	183	2.8	5	24.8	176.9	2.5	4.9	26.7	183
	33	2	2.3	2.3	21.7	147.2	5.3	5	19.8	198.3	2.3	6.8	8.8	124.9	2.3	2.5	19.5	134.2	3.6	4.9	14.6	134.2	5.2	6.4	13.3	152.5
	33	3	2.3	3.7	11.6	112.3	2.2	4.9	10.1	125.1	2.6	1	7.9	61.5	3.1	6	17.1	160.8	3.7	5.6	33.3	226.2	1.9	3.7	8.1	83.9
	34	1	2.6	5	6.7	104	4.2	5	22.7	207.4	1.9	4.8	10.1	107.1	3.2	4.9	15.1	140.3	5.2	6.4	13.3	152.5	4	4.6	12	122
	34	2	1	3.5	5.1	69.7	2.4	0.3	18.1	117.4	3.7	2.2	12.9	103.5	2.1	2.3	4.9	58	1.7	3	9.6	82.4	1.2	3.5	7.7	76.3
	34	3	1.3	4.1	10	102.6	2.8	5	19.5	181.4	2.7	3.7	11.2	105.4	1.7	2.3	20.6	134.5	2.8	3.9	26.5	173.7	4.5	5	12.2	129.6
	35	1	5.8	13.3	36.7	364.8	6.3	16.6	45	476.1	4.7	12.3	43.4	352.4	4.3	18.7	53.3	474.9	4.5	13.3	26.7	278	7.2	17.9	41.5	405.4
	35	2	3.7	16.7	36.7	389.8	3.3	5	31.7	251.9	1.7	9.5	25.3	223.6	3.5	5	24.7	191.1	4.8	10	35	283.8	3.7	5	29.4	202.7
	35	3	4.9	6.7	50	353.2	5	18.3	56.5	551	8.5	19.8	75	596.4	6	16.6	60	495.8	4.9	10.1	40	308	5.3	18.3	55.8	463.3
	36	1	7.3	23.3	60	600.2	5.1	16.7	46.7	479.6	5.2	11.7	35	311.7	3.5	18.2	52.7	463.3	5.6	23.9	53.3	509.7	3.7	11.7	46.7	347.5
	36	2	3.5	6.7	26.7	228	5.2	11.7	28.3	321.4	3.1	3.7	23.1	161.3	6.1	6.7	46.5	330.1	4.4	10	20	214.3	3.7	5	29.4	202.7
	36	3	6.6	8.3	55	406	7	13.3	45	442.5	6.3	6.7	48.3	325.6	5.1	11.6	53.3	408.1	4.2	25.2	55	522.6	3.7	8.1	16.1	173.8
	37	1	3	2.3	13.5	110.8	3.1	3.7	17.4	157.1	2.3	2.3	20.9	132	3.5	3.7	15.3	131.2	4.1	4.4	15.7	137.3	2.3	5	9.8	106.8
	37	2	2.8	3.7	11.7	116.2	2.8	3.7	26.4	204.4	2.7	5.7	13.2	135.6	1.4	3.4	10.1	91.5	2.3	3.8	10.4	97.6	2	4	9	91.5
	37	3	2.3	3.7	11.6	112.3	3.6	5	10.7	137.8	2.5	5	12.7	124.5	1.3	3.7	10.2	94.7	2.8	3.7	12.4	108.4	1.2	0.9	8.4	53.4
	38	1	6.4	16.7	55	497.2	6.7	30	50	660.2	5.3	19.5	55.8	487.9	5.8	31.7	46.6	579.2	6.9	20.1	55	486.5	5	27.4	61.7	579.2
	38	2	7.8	36.7	60	750.3	5.5	21.3	60	608.1	5.7	21.5	41.6	447.2	7	23.1	65	590.8	5.2	26.9	49.7	521.3	5.2	26.9	49.7	521.3
	38	3	8.3	25	65	649.6	7.3	27.8	58.3	684.2	3.4	18.1	46.3	418.8	6.7	24.6	68.3	621.3	6.1	15	43.4	378.9	5.2	26.9	49.7	521.3
	39	1	4.9	23.3	75	660.5	8.4	25	65	695	8.6	26.9	58.3	596.3	5.8	13.2	35	335.9	6.9	20.1	55	486.5	5.3	18.3	55.8	463.3
	39	2	8.6	33.3	78.3	809.1	5.7	28.3	66.7	726.3	6.7	27.8	61.7	609.9	5.8	13.2	35	335.9	6.7	14.9	33.3	335.9	7.2	17.9	41.5	405.4
	39	3	8.9	40	80	893.3	7.6	38.3	65	843.4	7.1	33	51.7	621.6	5.6	23.5	58.4	554.8	9	50.2	80	911.4	8.4	26.1	73.3	637.1
	40	1	2.7	3.7	11.7	115.6	2.3	2.3	20.7	154	3.5	4.8	16.6	146.3	2.8	3.7	12.4	112.9	3.2	0.3	30	155.6	2	5.2	16.5	137.3
	40	2	2.6	5	6.8	104.6	3.2	2.3	18.3	146.4	2.3	2.3	13.8	99.9	2.3	4.8	10.1	109.8	2.1	2.5	17.6	115.9	4	4.6	12	122
	40	3	2.7	3.7	10	106.9	4.4	5	20	194	3.1	4.2	8.4	100.5	2	5	12.4	122.2	6.3	6.7	20	191.8	4	4.6	12	122
	41	1	4.2	6.7	26.7	232.4	4	8.3	41.5	347.5	6.1	26.7	50	542.1	4.2	6.7	33.3	254.8	6.8	10.7	40	324.3	5.6	7.4	28.2	231.7
	41	2	5.7	11.7	23.3	279.5	4.9	11.6	43.1	399.6	5.4	18.2	61.8	501.5	4.2	6.6	26.6	220.1	6.7	14.9	33.3	335.9	7.4	5	44.2	289.6
	41	3	5.7	26.7	52.1	588.7	4.1	18.3	23.3	363.5	8.4	19.8	75	595.7	3.7	5	29.4	215.4	7.2	31.9	56.8	614.1	4.9	6.8	36.8	260.6
	42	1	6.8	16.7	51.7	483.3	6.2	23.1	70	688.1	7.3	21.7	45	474.3	6.8	26.5	46.8	532.8	5.3	18.3	55.8	463.3	5	27.4	61.7	579.2
	42	2	7.2	17.5	50	485.5	5.5	21.3	60	608.1	7.3	21.7	45	474.3	7.2	18.5	41.5	428.6	6.8	16.7	55	451.8	5.2	26.9	49.7	521.3
	42	3	6.3	20	45.9	487.2	7.9	16.7	70	624.4	7.5	27.4	75	670.4	6.2	13.1	35	337.3	7	23.3	50	496.5	5	27.4	61.7	579.2
	43	1	5.8	13.3	36.7	364.8	7	23.5	50	587.3	5.2	11.6	53.3	393	6.1	26.7	63.3	613.9	6.8	18.3	61.7	498.1	7.2	17.9	41.5	405.4
	43	2	5.8	8.3	23.3	242.7	7.8	13.3	41.7	429.2	6.2	20	46	454	4.2	16.7	40	388	6	6.7	33.1	249	4.9	6.8	36.8	260.6
	43	3	3.8	8.3	26.7	247.7	6.1	16.7	60	558.8	3.3	5	31.7	215	5.6	17.8	58.8	500.4	8.8	30.7	80	715.4	7.4	5	44.2	289.6
	44	1	6.5	30	69.5	716.4	6.8	26.6	58.3	667.2	6.1	26.7	50	542.1	4.9	10	40	324.3	5.7	26.7	52.1	532.8	5.3	18.3	55.8	463.3
	44	2	6.8	28.3	67.9	691.4	5.6	16.7	41.7	455.2	5.2	11.6	53.3	393	4.2	10	38.3	312.8	6.2	6.7	36.7	266.4	7.4	5	44.2	289.6
	44	3	7.2	16.7	68.3	568.4	7.2	16.3	68.3	606.2	6.3	13.2	48.3	393.7	6.8	8.3	38.3	308.4	5.9	33.3	56.7	620.6	3.7	11.7	46.7	347.5
	45	1	1.3	2.3	20.8	137.1	2.6	5	20	183	3.1	3.7	8.6	96.4	3.2	4.9	15.1	140.3	4	4.6	12	122	4	4.6	12	122
	45	2	1.6	5	15	139.5	3.4	6.6	23	222.7	3.6	4.9	10.7	121.3	3	5	20	164.7	3.2	8.3	14.2	164.7	5.2	6.4	13.3	152.5
	45	3	2.3	3.7	11.6	112.3	3.9	5.1	12.1	148.8	3.2	2.8	8.3	85.8	4.4	5.2	16.3	155.6	2.1	2.2	12.8	91.2	4	4.6	12	122
	46	1	2.5	3.7	13.3	122.4	3.6	5	30	244	2.5	4.9	18.6	149.9	2.2	4.7	12.8	122	2	4	9	91.5	4	4.6	12	122
	46	2	4.5	5	20	182.1	2.5	6.7	21.2	208.9	3.4	6.8	18.4	174.9	2.7	3.5	10.4	100.7	4.1	4.4	15.7	137.3	2	5.2	16.5	137.3
	46	3	1.1	3.5	5.1	70.6	2.9	5	22.8	200.4	4.8	5.3	18.3	166.6	2.1	1	6.5	53	1.6	2	9.1	69.7	1.9	3.7	8.1	83.9
	48	1	3.3	3.7	23.3	177	4.5	8.6	16.8	218.1	2.3	6.8	8.8	124.9	2.7	3.6	11.5	106.8	2.3	5	9.8	106.8	2.3	5	9.8	106.8
	48	2	3.5	8.4	16.3	194.8	1.7	5	13.5	141.7	1.4	2.8	9.3	79.6	1.8	4.3	8.1	92.4	2	4	6.5	80.2	2	2.8	5.2	62.5
	48	3	4.5	8.4	16.8	203.1	3.3	6.6	23	222.2	2.5	6.7	23.4	190.9	3.3	4.9	16.4	147.3	2.1	2.2	12.8	91.2	4	4.6	12	122
	49	1	1.5	2	10	80.8	2.3	5	13.1	143.4	1.9	4.8	10.1	107.1	1.8	5	13.8	128.1	2.1	2.5	5.6	61.6	2	4	9	91.5
	49	2	2.2	2.3	10.5	91	2.4	3.6	11.6	119.7	2.7	5	11.3	119.5	2.3	2.5	5.8	65.6	1	0.8	6.2	41.2	1.2	1.4	3.9	38.1
	49	3	2.3	4.9	10	117.6	2.8	5	19.5	181.5	2	5	18.4	147.3	4.3	6.8	20	189.5	1.9	2.4	8.5	72.5	2.3	5	9.8	106.8
	50	1	2.6	5	6.7	104	3.6	5	16.7	170.8	4.1	8.2	21.4	207	1.7	5.1	11.3	115.9	2.3	3.8	10.4	97.6	4	4.6	12	122
	50	2	1	1	4.7	40.7	2.1	2.3	10.2	95.3	2.5	6.7	23.4	190.9	2.7	4.5	6.3	90	1	0.8	6.2	41.2	1.2	1.4	3.9	38.1
	50	3	2	0.7	6.7	53.5	2.1	4.9	6.3	103.3	6.5	5.3	28.1	221.3	1.4	1	4.7	40.6	1	1	3	29.2	1	1	6.7	45.8
	51	1	2.3	5	11.7	127.3	2.1	10	21.7	247.1	3.4	4.5	13.5	128.5	4.6	3.8	19.5	158.6	3.1	3.7	23.2	158.6	5.2	6.4	13.3	152.5
	51	2	2.3	3.7	11.6	112.3	3.1	3.7	17.4	157.1	3.1	3.7	8.6	96.4	3.5	3.7	15.3	131.2	1.6	3.4	10.2	88.5	2.3	5	9.8	106.8
	51	3	2.7	3.7	10	106.9	4.4	5	20	194	3.2	2.8	8.3	85.8	2.7	3.6	11.2	105.5	3.4	5.1	19.7	158.3	4	4.6	12	122
	52	1	2.6	5	13.2	136.4	2.3	2.3	14.7	121.3	2.8	3.6	20	144.5	2.4	3.4	11.8	105.2	1.8	2.3	6.6	62.5	1.2	0.9	8.4	53.4
	52	2	3.6	3.7	16.6	145.3	3	3.7	9.6	113.6	2.7	5	11.3	119.5	2.3	3.3	10.3	96.1	1.4	1.2	6.2	47.3	1.2	1.4	3.9	38.1
	52	3	2.5	5	11.7	128.3	2.2	5	13.3	144.1	1	5	13.3	118.1	2.2	4.6	6.7	90.4	1.8	2.4	5.1	56.8	2.7	1.6	6.7	61
	53	1	.	.	.	.	7	13.3	41.7	424	9.1	36.9	58.4	704.7	3.5	18.2	52.7	463.3	6.2	19.9	46	440.2	3.7	11.7	46.7	347.5
	53	2	6.5	10	46.7	382.5	6.3	21.7	40	507.4	9	28.3	96.7	786.1	6.4	30	63.3	648.7	6.2	19.9	46	440.2	3.7	11.7	46.7	347.5
	53	3	6.3	20	45.9	487.2	6.7	13.2	43.3	430.1	7.8	40	90	871.7	5.8	25	63.3	595.6	7	10	43.3	333.2	7.4	5	44.2	289.6
	54	1	6.3	21.7	40	476.6	6.5	16.7	54.7	531.7	8.8	31.7	80	745.4	6.8	17.9	61.7	521.3	6.7	14.9	33.3	335.9	7.2	17.9	41.5	405.4
	54	2	5	20	55.9	529.6	7	18.4	55	556	9.1	36.9	58.4	704.7	6.8	26.5	46.8	532.8	3.7	11.7	46.7	347.5	5.3	18.3	55.8	463.3
	54	3	7	23.3	50	548.1	6.9	24.9	68.3	703.3	8.7	36.7	96.7	872.4	7.5	34.8	56.8	669.7	4.8	13.1	33.3	307.4	6.8	19.3	58.2	492.3
	55	1	8.5	46.7	83.3	981.2	8.2	29.8	86.7	868.8	9	53.5	80	975.8	9	53.6	87.6	1019.3	9.1	35.9	58.4	671.8	8.5	44.9	70	810.8
	55	2	9	50.3	93.3	1073.9	6.4	29.7	79.4	816.6	8	38.3	71.7	772.5	8.3	45	84.7	915.1	6	34.3	68.3	683.4	7.1	38.4	73.3	752.9
	55	3	8.2	43.2	90	974.5	7.8	56.7	73.3	1102	9	48.3	83.2	935.3	8	51.8	86.7	991.6	7.8	27.1	56.8	569.4	9	53.2	76.7	926.7
	56	1	1.5	2	10	80.8	2.1	5	20	180	2.7	4.6	6.3	92.8	1.8	5	13.8	128.1	2.3	3.6	8.2	85.4	2	4	9	91.5
	56	2	2.7	5	11.7	129.8	3.3	8.1	11.8	177.7	2	5	10.6	112.4	5.2	8.8	18.4	205.9	2.1	4.7	13.8	120.5	4.5	5	12.2	129.6
	56	3	1.4	2	10	80.2	3.6	5	10.7	137.8	1.8	2.3	6.1	62.4	2.7	5.7	13.2	136.5	1.3	1	7.8	52.5	1.2	0.9	8.4	53.4
	57	1	4.3	13.3	40	372.2	4	8.3	41.5	347.5	6.6	16.7	54.6	460.8	6.8	26.5	46.8	532.8	6.9	20.1	55	486.5	5.6	7.4	28.2	231.7
	57	2	6.3	6.7	48.3	353.1	5.4	16.7	50.8	503.9	6.6	24.8	56.8	555.6	8.7	26.8	88.3	752.9	5	11.5	53.3	382.3	7.2	17.9	41.5	405.4
	57	3	7.2	15	51.7	466.9	7	8.3	33.3	320.7	6.8	19.7	58.2	509.8	6.1	26.8	50	548.7	5.4	17.9	61.8	486.7	4.9	6.8	36.8	260.6
	58	1	8.7	36.7	85.7	884.1	7	18.4	55	556	7.3	15	51.6	433.7	7.2	13.3	45	393.8	5.7	26.7	52.1	532.8	5.3	18.3	55.8	463.3
	58	2	7.3	31.7	56.8	676.7	6.7	26.6	48.3	611.6	7.8	23.3	61.7	569.2	4.8	21.9	48.7	486.5	6	8.3	61.7	393.8	5.3	18.3	55.8	463.3
	58	3	8.3	33.3	83.3	832.3	6.1	20	63	613	8.3	21.6	76.5	620.8	3.6	15.2	36.7	353.7	6.6	13.1	55	414.8	6.7	16.4	51.9	434.4
	59	1	6.7	35	70	775.3	4.2	10	38.3	351	7.3	21.7	45	474.3	5	16.7	33.4	359.1	4.2	14.9	41.6	359.1	3.7	8.1	16.1	173.8
	59	2	8.3	31.6	86.7	831.2	7	23.2	56.6	620.3	7.1	34.2	56.8	657.3	4.5	20	58.6	515.5	3	15	41.5	353.3	3.3	15	33.4	318.5
	59	3	8.1	30	86.7	812	5.3	23.2	42.6	532.8	5.8	31.7	46.6	577.2	7.1	10	41.5	343.1	7.2	6.6	43.3	300.5	5.6	7.4	28.2	231.7
	60	1	3.8	5.1	13.2	144.9	3.2	4.8	15.7	160.9	4.4	5	16.2	151.7	2	1	8.5	62.5	2	4.4	5.7	80.8	1.9	3.7	8.1	83.9
	60	2	2.8	3.7	19.5	154.9	2.3	5	13.1	143.4	3.5	7	23.4	199.8	2.3	4.8	10.1	109.8	2.1	2.5	17.6	115.9	2	4	9	91.5
	60	3	3.8	5.1	13.1	144.3	2.8	5	19.5	181.6	4.8	5.3	18.3	166.6	1.7	1.6	5	49.6	3.1	3.2	19.5	136.8	1.9	3.7	8.1	83.9
	61	1	5.7	18.3	58.3	527.4	6.7	28.4	67.9	740.2	8.7	43.4	70.8	826.7	6.1	26.7	63.3	613.9	5.6	28.3	66.7	613.9	8.4	26.1	73.3	637.1
	61	2	4.2	10	20	235.4	4	8.3	41.5	347.5	6.6	16.7	54.6	460.8	4.5	15	35	347.5	5.7	5.1	33.2	231.7	5.6	7.4	28.2	231.7
	61	3	5.7	15	30	349.2	6.9	16.5	61.6	570.2	6.4	29.6	79.4	706.7	6.3	15	53.5	449	4	15	35.1	329.9	6.7	16.4	51.9	434.4
	62	1	2.8	3.7	19.5	154.9	6.1	9.8	16.9	242.5	3.6	5.2	18.7	160.6	3.5	3.7	15.3	131.2	2	5.4	10.6	112.9	2.3	5	9.8	106.8
	62	2	2.7	3.7	23.1	172.4	1	5	13.3	136.5	2.8	3.6	20	144.5	3.3	5.2	9.8	117.4	1.9	5.2	9.5	105.2	1.9	3.7	8.1	83.9
	62	3	1.7	5	11.6	123	2.7	6.7	13.2	166	2.5	5	12.7	124.5	1.3	3.7	10.2	94.7	1.7	2	6.4	58.1	1.2	0.9	8.4	53.4
	63	1	2.8	5	15	146.4	2.9	3.7	21.5	178.4	3.1	3.7	8.6	96.4	2.8	3.7	12.4	112.9	2.7	1	6.7	54.9	1.2	3.5	7.7	76.3
	63	2	2.6	5	6.8	104.6	3.3	3.7	11.7	126.6	1.7	2.2	9.2	74.9	1.7	2.8	9.2	82.4	1	3.4	6.8	70.2	1	1	6.7	45.8
	63	3	3	2.3	11.7	101.6	3.6	3.8	19.5	172.4	1.4	0.8	6.7	47	2.3	3.5	11.4	103.5	1.1	1	2.9	29.3	1.2	1.4	3.9	38.1
	64	1	3	10	30	278	4.4	10	33.3	324.9	5.3	13.3	26.7	291.4	3.6	5.1	31.4	225.9	3.1	3.8	17.4	133.2	2.2	4	20.6	144.8
	64	2	7.3	31.7	56.8	676.7	6.9	19.9	58.3	590.8	6.1	26.7	50	542.1	7	13.2	50	417	4.3	16.7	40	370.7	3.7	11.7	46.7	347.5
	64	3	3.5	15	36.7	369.5	4.7	10	35	335.5	7.1	8.2	36.3	292.3	1.7	3	9.4	85.7	3.1	6	17	153.5	3.4	4.2	13.5	121.6
	65	1	8.4	43.3	65	851.8	5.1	16.7	46.7	479.6	7.8	23.3	61.7	569.2	4.8	21.9	48.7	486.5	6.2	19.9	46	440.2	3.7	11.7	46.7	347.5
	65	2	9	50.3	93.3	1073.9	8.3	21.7	76.4	719.3	6.6	24.8	56.8	555.6	6.1	20	62.8	544.4	6.3	21.4	40	428.6	5.2	26.9	49.7	521.3
	65	3	7.5	50	71.8	954.2	5.2	16.7	46.7	479.8	6	33.2	63.3	669.7	7.5	28	58.3	609.2	5.7	28.1	53.3	552	6.9	13.6	45	376.5
	66	1	2.4	3.7	11.5	112.7	2.1	5	10.6	128.1	2	1	8.5	60.7	1.8	2.2	6	61	2.7	1	6.7	54.9	2.7	1.6	6.7	61
	66	2	2.8	3.7	11.7	116.2	3	3.7	10	115.9	2.3	2.3	13.8	99.9	1.2	1.2	6.8	51.9	2.3	3.6	8.2	85.4	2.7	1.6	6.7	61
	66	3	2.7	3.7	10	106.9	2.1	5	11.1	131.6	2.4	2.3	10.4	85.7	1	1	2.3	26.4	1.2	1.2	6.6	48.2	1	1	6.7	45.8
	67	1	2.7	8.3	21.7	216.2	6	6.7	33.2	295.4	5.8	13.2	36.8	338.8	4.3	18.7	53.3	474.9	4	8.5	20	196.9	3.7	8.1	16.1	173.8
	67	2	7.2	17.5	50	485.5	4.9	20	53.3	552.5	9.2	26.6	73.3	664.1	7.9	36.7	60	706.6	5	11.5	53.3	382.3	5.2	26.9	49.7	521.3
	67	3	7.2	16.7	68.3	568.4	6.3	13.3	48.3	456.1	6.7	13.3	33.2	329.3	6.8	36.7	76.7	784.5	6.4	6.3	28.3	225.7	3.7	11.7	46.7	347.5
	68	1	2.9	6.7	38.3	282.5	8.6	14.7	63.2	568.2	6.7	14.8	63.5	481.1	4.5	8.2	33.5	272.2	2.2	6.7	24.9	191.1	4.9	6.8	36.8	260.6
	68	2	7.2	17.5	50	485.5	7	15	40	434.4	7	6.7	38.3	284.6	2.4	5	20	162.2	3.7	8.1	16.1	173.8	3.7	8.1	16.1	173.8
	68	3	7.2	16.7	68.3	568.4	6.7	23.2	52.8	597.1	3.4	18.3	33.3	362.6	7.1	10	41.5	343.1	6.5	5.3	28.2	215.6	5.6	7.4	28.2	231.7
	69	1	6.9	20	55	536.9	8.8	32.8	57.7	747.1	6.8	13.3	53.3	420.1	3.9	11.8	46.7	370.7	5	11.5	53.3	382.3	5.2	26.9	49.7	521.3
	69	2	7	23.3	43.3	514.9	8	38.3	71.7	882.7	6.3	24.8	48.2	515	6.6	13.3	43.2	382.3	6.2	19.9	46	440.2	5	27.4	61.7	579.2
	69	3	7.2	16.7	68.3	568.4	8.7	31.7	76.7	838.8	7.5	27.4	75	670.4	6.2	13.1	35	337.3	6.3	16.7	46.7	411.6	5	27.4	61.7	579.2
	70	1	4.3	6.7	20	199.1	4.1	8.3	20	230.3	3.1	3.7	8.6	96.4	3	3.5	17.4	137.3	2	2.5	9	76.3	2.3	5	9.8	106.8
	70	2	2.5	3.7	19.5	153	3.5	6.7	26.6	244.8	1.9	2.1	6.5	62.5	2.8	2.7	8.6	83.9	1.2	1.2	7.7	53.4	2.1	2.1	8	68.6
	70	3	3.6	5	31.7	235.2	3.7	8.3	36.7	319.4	2.1	1.7	22.8	132.9	3.5	3.6	15.3	130.2	2.8	5.9	13.1	133.3	2	5.2	16.5	137.3
	71	1	7	33.3	51.9	667.9	7.5	18.3	46.4	510.8	5.7	21.5	41.6	447.2	7.3	23.1	60	567.6	6.8	16.7	55	451.8	7.4	5	44.2	289.6
	71	2	8.8	31.7	80	801.7	7	10	40	377	1.7	9.5	25.3	223.6	4.5	20	58.6	515.5	5.9	13.2	36.8	330.1	3.7	5	29.4	202.7
	71	3	8.5	40.1	88.3	933.8	7.5	10	48.3	425.6	6.8	16.5	61.6	491.3	7.6	36.6	83	819.3	8.9	40.1	80	810.1	5.6	7.4	28.2	231.7
	72	1	3.5	2.3	18.6	139.1	2.9	3.7	21.5	178.4	1.8	2.6	9.8	82.1	2.1	4.8	6	88.5	1.3	1.1	10.2	64.1	1.2	3.5	7.7	76.3
	72	2	1.2	3.4	6.8	78.6	3.5	2.3	23.3	175.2	1	1	4.5	36.8	1.2	1.2	3.9	37.5	1.3	1	4.5	37.5	1.1	0.9	3.8	32
	72	3	1	1	5.1	42.8	3.5	2.3	23.3	175.5	1	1	2.4	27.4	1.3	1	6.6	49.4	1	1	6.6	45.2	1.1	1.1	3	30.5
	73	1	3.7	5	28.3	218.5	3.3	15	33.3	375.3	7.2	13.3	31.7	325.3	6.9	20	55	509.7	3.7	8.1	16.1	173.8	5.6	7.4	28.2	231.7
	73	2	5.8	8.3	23.3	242.7	7.8	13.3	41.7	429.2	1.7	9.5	25.3	223.6	4.2	16.7	40	388	3.7	5	29.4	202.7	4.9	6.8	36.8	260.6
	73	3	2.8	6.7	23.3	207.1	5.2	11.7	43.3	404.1	6	6.7	28.3	233.8	6.4	30.6	64.5	660.6	6.5	5.3	28.2	215.6	5.6	7.4	28.2	231.7
	74	1	3.3	3.7	23.3	177	3.1	3.7	17.4	157.1	3.5	4.8	16.6	146.3	2.2	4.5	7.7	94.6	1.6	3.4	10.2	88.5	2.3	5	9.8	106.8
	74	2	3.6	6.7	26.7	228.5	1.7	5	13.5	141.8	3.3	3.7	13.1	117.8	3	4.5	11.8	119	2.8	3.7	14.8	119	1.2	3.5	7.7	76.3
	74	3	2.8	11.7	20	245.9	2.7	7	16.6	187.9	3	3.5	18.4	137.6	1.2	3.1	6.3	68.7	2.4	3.5	10.7	96.3	2	4	9	91.5
	75	1	6.5	10	36.7	332.5	5.6	16.7	41.7	455.2	3.5	8.1	36.7	271.1	7.2	18.5	41.5	428.6	6.8	16.7	55	451.8	7.4	5	44.2	289.6
	75	2	5.8	5	35	264.8	6.4	15	35	403.1	7	5	33.3	244	4.5	15	35	347.5	4.3	16.7	40	370.7	5.6	7.4	28.2	231.7
	75	3	6.3	20	45.9	487.2	6.3	15	53.3	503.6	5.7	10	33.3	289	7.1	33	51.7	624.3	5.8	26.9	50	525.9	7.2	17.9	41.5	405.4
	76	1	1.8	2.3	6.6	69.2	2.9	3.7	21.5	178.4	1.8	2.6	9.8	82.1	1.8	2.2	6	61	1	3.4	6.8	70.2	1.2	3.5	7.7	76.3
	76	2	1	5	13.3	127.8	2.7	3.7	22.8	184.5	3.5	4.8	16.6	146.3	2.7	3.5	10.4	100.7	2.4	3.3	10.7	94.6	2	5.2	16.5	137.3
	76	3	2.7	3.7	10	106.9	3.2	4.8	15.5	159.5	2.4	3.3	10.4	95.7	2	5.4	15.8	143.3	1.9	5.1	10.6	109.2	3.3	5.2	9.8	114.4
	77	1	4.7	16.7	50	461.9	5.5	10	46.7	404.8	3.8	6.7	35	250.7	5.7	13.1	43.4	376.5	3.5	5.6	23.2	179.5	3.7	5	29.4	202.7
	77	2	7.9	35	65	757.6	6.6	26.7	83.2	804.5	6.2	15.2	48.1	413.4	6.6	27.8	61.7	619.7	4.9	8.2	51.7	341.7	6.8	19.3	58.2	492.3
	77	3	4.8	20	55.8	527.8	5.7	26.7	52.1	627.7	6.3	8.3	28.3	252	8.7	30	75.5	721.1	4.7	6.7	33.3	242.7	3.7	11.7	46.7	347.5
	78	1	4.7	16.7	50	461.9	3.8	10	28.3	293.6	.	.	.	.	6.1	19.4	35	399.6	3	5	20	156.4	3.7	5	29.4	202.7
	78	2	5.6	13.3	56.7	463.4	6.4	11.6	41.7	401.4	6.6	13.3	55	426.9	7.2	17.3	49.7	457.5	5.7	11.3	23.3	249	4.9	6.8	36.8	260.6
	78	3	5.8	8.3	23.5	243.6	6.2	13.3	35	382.7	6	6.7	28.3	233.8	6.6	24.8	56.8	565.3	3.7	5.9	35	236.8	5.6	7.4	28.2	231.7
	79	1	1.8	2.3	6.6	69.2	3.4	4.7	13.3	147.9	3.4	3.6	11.6	110.6	1.3	3.2	6.3	70.2	1.8	1	8.4	58	1.2	3.5	7.7	76.3
	79	2	1.3	1	6.7	52.3	1.8	2.3	6.1	70.9	1.3	1.1	11.2	69.6	1.1	1	3.9	35.1	2	3.4	7.3	77.8	1.2	1.4	3.9	38.1
	79	3	3.1	2.3	8.3	85.5	2.6	5	6.1	106.4	1.2	2.4	7.8	67.2	1.1	3.2	5.5	65.3	1.4	1	4.4	37.8	2.7	1.6	6.7	61
	80	1	5	15	33.3	361.9	.	.	.	.	4.6	3.8	19.6	155.9	6.4	6.7	30	249	3	5	20	156.4	2.2	4	20.6	144.8
	80	2	3.6	5.5	23.3	198.6	6.2	11.6	53.3	463.9	3.5	5.5	23.2	183	2.3	6.7	24.9	202.7	3	5	20	156.4	2.2	4	20.6	144.8
	80	3	4.2	15	35	365.4	7	10	43.3	395	2.3	2.3	14.7	104.1	.	.	.	.	3.2	8	11.7	150.3	3.3	3.9	13	115.8
	81	1	2.8	10	30	276.6	4.8	15	41.1	427.4	5.2	11.7	35	311.7	4.1	8.2	21.2	208.5	4.7	6.7	28.3	220.1	7.4	5	44.2	289.6
	81	2	6.6	13.3	46.7	419.3	5.2	11.7	28.3	321.4	3.5	5.5	23.2	183	2.8	3.5	21.5	156.4	4.4	5.4	20	168	3.7	5	29.4	202.7
	81	3	6.3	16.7	45	446.6	5.4	20	40	482.1	7	26.4	53.3	559.4	6.5	10	31.7	291	6.5	6.7	38.4	275.4	7.2	17.9	41.5	405.4
	82	1	2.3	2.3	11.4	96.1	3.6	5.1	10.7	138.8	1.2	3.5	10.1	89.2	1.7	3.5	7.2	79.3	3.5	3.7	15.3	125.1	2.3	5	9.8	106.8
	82	2	3	3.7	10	108.5	4	5.3	20	195.2	3.1	3.7	8.6	96.4	1.4	3.4	10.1	91.5	2	4	9	91.5	4	4.6	12	122
	82	3	3	2.3	11.7	101.6	3.8	8.3	16.1	206.6	2.2	2.4	10.5	85.5	3.3	3.6	13.1	118.2	1.9	5.1	10.6	109.2	3.3	5.2	9.8	114.4
	83	1	2.2	2.3	9.2	84.4	2.2	2.2	11.3	100.7	1.9	4.8	10.1	107.1	2.6	3.8	10.5	103.7	1.3	1.1	10.2	64.1	2	4	9	91.5
	83	2	2.1	2.3	10.3	89.1	2.6	5	6.1	106.8	2.2	2.3	9.2	78.5	1.3	3.3	4.9	64.1	2.3	3.8	10.4	97.6	2	4	9	91.5
	83	3	3.5	2.3	18.5	139	3.2	0.3	30	187.6	2.3	6.8	8.8	124.9	2.3	3.2	11.3	100.3	3.5	5.6	23.2	179.8	2.4	5.7	20	160.1
	84	1	8.2	46.5	76.7	944.4	6.8	26.7	46.7	604.7	6.7	25	83.3	677.6	8.6	26.9	58.1	602.3	7.3	27.9	73.2	648.7	5	27.4	61.7	579.2
	84	2	9	53.1	81.3	1044.5	8.8	32.8	57.7	747.1	6.7	27.8	61.7	609.9	6.1	26.7	63.3	613.9	8.3	44.2	84.7	868.8	7.1	38.4	73.3	752.9
	84	3	9	53.1	87.5	1075.9	8.9	40.1	80	954.2	6	30	64.4	640.5	7.7	41.9	71.7	816.3	9	62.3	93	1091	9	54.6	80	955.6
	85	1	2.7	3.7	11.7	115.6	3.3	3.7	23.3	190.6	2.3	2.3	20.9	132	4.4	5.2	16.3	155.6	2	5.4	10.6	112.9	2	5.2	16.5	137.3
	85	2	3	2.3	13.4	110.4	3.3	5	22.7	202.1	2.3	3.4	11.6	101.7	3.6	4.9	10.7	120.5	2.5	5.5	12.8	126.6	4.5	5	12.2	129.6
	85	3	2	1.6	5	54.5	2.8	5	19.5	181.7	2	1.6	5	51.4	2	3.2	11.4	98.7	2	0.7	6.4	46.7	2.7	1.6	6.7	61
	86	1	6.5	31.7	60	687.7	7.4	35	81.8	896.6	6	31	64.2	650.5	8.3	43.5	90	926.7	8.7	27.3	88.3	718.2	8.5	44.9	70	810.8
	86	2	5.8	20	66.7	588.4	7.1	39.8	73.3	903.5	8.6	26.9	58.3	596.3	7.2	33.4	65	695	8.5	24	65	579.2	7.9	35.9	65	695
	86	3	8.7	30	75.5	759.3	9	62.3	93.1	1282.6	8.1	29.5	75	696	8.9	59	83.5	1052.1	9	57.3	86.7	1012.6	9	61	85.1	1042.5
	87	1	3.7	3.7	11.7	121.2	2.3	5	13.1	143.4	3.6	4.9	10.7	121.3	4.6	3.8	19.5	158.6	3.6	4.9	14.6	134.2	2	4	9	91.5
	87	2	2.5	3.7	13.3	122	3.3	3.7	19.8	171.6	2.1	2.3	4.9	58.9	2.6	3.5	10.8	102.2	2.2	2.1	12.6	90	2.1	2.1	8	68.6
	87	3	4.2	10	20	235.2	2.8	2.2	35	234.9	2.7	3.4	11.5	103.7	2.5	3.5	13.4	114.6	2	5.8	13.5	129.9	2	4	9	91.5
	88	1	7	23.3	68.3	639.9	5.5	8.3	41.7	357.9	7.5	9.8	48.4	365.9	7.3	23.1	60	567.6	6.7	14.9	33.3	335.9	7.4	5	44.2	289.6
	88	2	7.3	15	58.3	500.2	4.3	5	16.4	173.8	3.4	5.1	19.7	162.6	4.5	15	35	347.5	6.1	9.9	16.9	208.5	3.3	3.9	13	115.8
	88	3	7.1	36.7	65	771.5	4.6	12.4	43.4	408.7	3.3	5	31.7	215	6.7	28.6	67.9	659.1	2.5	6.7	21.2	176.1	7.4	5	44.2	289.6
	89	1	2.7	5	15	146	3.4	3.7	16.1	151.7	5.5	6.7	28.2	230.2	2.7	3.8	9.5	99.1	2.7	3.7	22.7	154	3.3	5.2	9.8	114.4
	89	2	1.3	2.4	8.3	75.5	2.1	2.3	10.2	95.3	4.3	7	18.8	183.8	1.3	1	4.3	38.1	1.2	1.2	7.7	53.4	1.2	1.4	3.9	38.1
	89	3	3.2	3.7	18	149.7	2.1	5	11.1	131.4	6.5	5	32.8	239.3	1.1	3.1	5.6	64.5	2	5.8	13.5	129.9	2	4	9	91.5
	90	1	3.6	18.3	53.1	488.4	4.6	10	56.2	451.8	7	13.3	50	406.6	5.5	29.4	70	671.8	9.1	35.9	58.4	671.8	3.7	11.7	46.7	347.5
	90	2	7	25	55.7	595.8	7	25	51.6	613.4	5.7	28.2	66.7	630.2	7	30	50	585	8.3	36.6	90	816.6	6.7	16.4	51.9	434.4
	90	3	7.4	23.3	61.7	609	7.4	15	58.3	537.3	5.8	19	55.8	485.4	7.7	45.2	71.8	849.5	8.2	45.3	76.6	842.8	7.4	5	44.2	289.6
	91	1	3	2.3	9.8	92.4	3.6	5.1	10.7	138.8	2.2	4.5	20.7	153.5	2.8	5	19.5	161.7	1.6	3.4	10.2	88.5	2.3	5	9.8	106.8
	91	2	2.8	3.7	19.5	154.9	4.3	5	16.4	173.9	3.3	8.1	16.3	178.4	2.7	8.3	23.4	213.5	2.9	3.5	17.1	128.1	5.2	6.4	13.3	152.5
	91	3	3.5	2.3	18.5	139	2.7	5	11.6	137.6	2.5	6.7	23.4	190.9	3.1	5	31.4	222.5	1.3	3.5	7.7	76.6	4	4.6	12	122
	92	1	4	5.3	15.2	158	2.6	5	6.1	106.8	1.8	2.6	9.8	82.1	2.3	3.5	7.8	85.4	2.3	3.8	10.4	97.6	2	4	9	91.5
	92	2	4.8	5.3	18.3	178.2	3.6	5	30	244	2.1	4.8	6.1	90.6	2.3	2.3	12.6	97.6	2.3	3.6	8.2	85.4	4	4.6	12	122
	92	3	2.7	7	16.7	176.4	5.6	6.7	28.3	266.1	2.7	3.7	11.2	105.4	1.6	3.5	6.8	76.9	3	2.4	17.2	117.8	4.5	5	12.2	129.6
	93	1	5	10	56.1	420.7	5.1	14.8	40	420.5	7.3	21.7	45	474.3	3.8	16.7	53.2	451.8	5.2	26.9	49.7	521.3	7.2	17.9	41.5	405.4
	93	2	5	20	55.9	529.6	9	36.9	58.4	799.3	5.3	19.5	55.8	487.9	5.8	31.7	46.6	579.2	6.6	28.9	66.7	625.5	5	27.4	61.7	579.2
	93	3	6.3	16.7	45	446.6	5.2	19.8	61.7	598.4	3	15	41.7	363	5.2	25	50	526.1	9	50.4	93.3	973.4	5.2	26.9	49.7	521.3
	94	1	1.8	2.3	6.6	69.2	2.7	2.3	11.4	105.2	3.3	3.7	13.1	117.8	2.2	4.5	7.7	94.6	3.5	3.7	15.3	125.1	1.2	3.5	7.7	76.3
	94	2	2.1	2.3	10.3	89.1	2.7	2.3	11.4	105.2	1.1	3.3	5.1	64.2	1.8	2.2	6	61	2	2.5	9	76.3	1.2	3.5	7.7	76.3
	94	3	2.7	3.7	10	106.9	2.4	1	6.7	62.6	2.7	3.8	9.5	98.6	0.9	1	3.6	32.6	2.3	3.2	11.3	95.5	1.1	1.1	3	30.5
	95	1	5.2	18.3	56.7	516.4	5.1	16.7	46.7	479.6	3.2	13.7	30	298.2	6.9	20	55	509.7	6.8	10.7	40	324.3	3.7	11.7	46.7	347.5
	95	2	6.5	13.3	48.3	426.6	6.4	13.3	46.7	448.3	6.8	13.3	53.3	420.1	7.6	34.5	60	683.4	4.5	13.3	31.9	301.2	7.2	17.9	41.5	405.4
	95	3	6.3	30	64.5	690.2	3.6	11.7	46.7	413.2	3.6	16.7	53.3	436.6	7.6	27.6	75	689.3	4.5	13.4	31.9	302.2	3.7	11.7	46.7	347.5
	96	1	3	5	26.7	206.5	3.4	8.3	16.4	205.9	1.3	2.4	10.4	79.9	2.7	3.6	11.5	106.8	2.7	5.7	13.2	131.2	2.3	5	9.8	106.8
	96	2	1.6	5	15	139.5	2.9	3.7	14.6	140.3	1.1	3.3	5.1	64.2	1.7	3.5	7.2	79.3	1.3	1.2	6.6	48.8	2.7	1.6	6.7	61
	96	3	1.7	5	11.6	123	3.6	3.6	15.3	147.2	1.7	2.3	5	56.7	1.3	3.7	10.2	94.7	2.8	3.7	12.4	108.4	1.2	0.9	8.4	53.4
	97	1	7.3	28.3	73.1	720.8	6.7	30	50	660.2	8.7	31.8	76.8	731.8	6.8	9.8	48.2	373	6.5	38.3	71.7	741.3	5	27.4	61.7	579.2
	97	2	5.8	6.7	28.3	250.1	3.7	6.7	35	291.9	7	13.3	50	406.6	4	4.8	15.6	146	6.6	28.9	66.7	625.5	5.6	7.4	28.2	231.7
	97	3	4.4	8.3	33.3	284.2	7.3	5	44.2	344.4	5.7	8.3	33.2	270.8	4	5.3	20	173.4	8.3	41.2	66.7	757.8	7.4	5	44.2	289.6
	98	1	3.1	0.3	30	171.6	2.1	5	10.6	128.1	3.6	4.9	10.7	121.3	2.3	4.8	10.1	109.8	4	4.6	12	122	2.7	1.6	6.7	61
	98	2	2.3	3.7	11.6	112.3	1.3	2.4	7.7	77.8	3.7	2.2	12.9	103.5	1.3	3.3	4.9	64.1	1	3.4	6.8	70.2	1	1	6.7	45.8
	98	3	3.5	2.3	18.5	139	2.3	3.7	6.8	93.9	2	5	9.7	108.3	1	0.8	6.3	44.8	2.1	2.5	17.5	115.3	1	1	6.7	45.8
	99	1	1.3	2.3	10	83.3	3	3.7	10	115.9	3.4	4.5	13.5	128.5	2.1	1.2	6.5	54.9	2	5	9.5	103.7	2.7	1.6	6.7	61
	99	2	2.5	5	13.1	135.6	3.4	8.3	16.4	205.9	3.6	5.2	18.7	160.6	2	2.4	8.5	76.3	3.5	3.7	15.3	125.1	2.3	5	9.8	106.8
	99	3	5.1	5.3	25	213.8	2.9	5	14.3	153.3	2.9	6.2	16.9	158.6	2.1	2.2	8	72.4	2.2	4.5	20.6	149.7	2.3	5	9.8	106.8
	100	1	2.5	3.7	19.6	153.8	1.7	5	13.5	141.8	3.5	4.8	16.6	146.3	1.7	1.8	5.2	52.5	2	2.5	9	76.3	1.2	3.5	7.7	76.3
	100	2	2.6	3.7	10	106.5	2.1	2.3	10.2	95.3	2.9	3.4	10	98.1	0.9	1	3.5	32	2.1	2.4	10.7	83.9	1.2	1.4	3.9	38.1
	100	3	1.3	9.8	25	240.6	3.5	2.3	23.3	175.3	3.5	6.7	26.4	210.2	2.8	1	6.7	57.6	2.1	2.4	10.7	83.9	2.5	2.5	13.4	99.1
	101	1	4.8	5.3	18.3	178.2	2.5	6.7	21.2	208.9	2.3	2.3	20.9	132	2.2	4.5	7.7	94.6	2.3	5	9.8	106.8	2	5.2	16.5	137.3
	101	2	2.8	3.7	11.7	116.2	2.8	8.3	21.7	231.8	2.5	4.9	18.6	149.9	1.8	5	13.8	128.1	2.3	3.6	8.2	85.4	4	4.6	12	122
	101	3	6	10	16.7	229.9	4.3	8.3	38.3	331.6	3.7	3.7	19.6	149.2	5.4	4.8	19.8	173.9	4.1	4.4	15.7	137	3.6	8.3	26.3	221.1
	102	1	6.2	20	63	572.3	7	13.3	41.7	424	6.6	16.7	54.6	460.8	7.2	22.3	73.3	625.5	6	8.3	61.7	393.8	3.7	11.7	46.7	347.5
	102	2	5.7	11.7	23.3	279.5	4.8	15	41.1	427.4	5.8	13.2	36.8	338.8	3.8	16.7	53.2	451.8	6.7	14.9	33.3	335.9	7.4	5	44.2	289.6
	102	3	6.3	20	45.9	487.2	4.6	16.7	50	494.5	5.8	19	55.8	485.4	6.7	28.6	67.9	659.1	5.2	10	26.6	248.3	7.4	5	44.2	289.6
	103	1	3.5	2.3	18.6	139.1	1.7	5	13.5	141.8	1.2	3.5	10.1	89.2	2.8	3.7	12.4	112.9	4.8	5.3	18.3	161.7	1.2	3.5	7.7	76.3
	103	2	4.8	5.3	18.3	178.2	3.2	8.3	14.1	192.2	1.7	2.2	9.2	74.9	2.3	2.3	12.6	97.6	4.4	6.9	20	183	2	4	9	91.5
	103	3	4.2	10	20	235.2	2.5	2.3	23.2	169	3.3	2.8	8.3	86.7	1.6	2.6	9.4	81.2	2.8	8.4	21.7	197	2	4	9	91.5
	104	1	5.7	21.7	41.7	481	7.1	23.2	41.7	538.6	6.8	26.4	46.8	528.6	4.5	15	35	347.5	3.7	11.7	46.7	347.5	5.2	26.9	49.7	521.3
	104	2	5.2	26.7	49.7	573.7	8.4	25	65	695	6.1	26.7	50	542.1	4.8	21.9	48.7	486.5	6.6	28.9	66.7	625.5	7.9	35.9	65	695
	104	3	8.2	21.7	76.4	669.9	7	36.4	56.5	771.3	7.6	26.7	61.7	603.8	4.8	22	48.6	486.8	7.2	15.7	68.3	504	8.5	44.9	70	810.8
	105	1	4.5	18.3	50	478.1	3.6	16.7	36.7	415.3	8.3	23.3	71.6	616.6	7.2	17.3	49.7	457.5	6.8	13.4	53.3	411.2	4.9	6.8	36.8	260.6
	105	2	4.1	18.3	53.3	492.8	4.9	8.2	51.7	408.3	8	39.5	88.4	860.6	6.9	10.7	40	341.7	7	11.1	53	388	6.9	13.6	45	376.5
	105	3	7.2	16.7	68.3	568.4	3.6	11.7	46.7	413.2	7.9	60	80	1037.4	6.7	23.3	52.8	530.6	7	10	31.6	280.9	3.7	11.7	46.7	347.5
	106	1	7.2	30	59.8	672.3	6.3	16.6	45	476.1	5.2	11.6	53.3	393	4.7	6.6	40	289.6	7.1	23.3	45.1	474.9	7.2	17.9	41.5	405.4
	106	2	3.5	6.7	26.7	228	3.3	10	39.6	352.7	2.3	6.7	25	196.5	7.2	6.6	43.3	318.5	4.2	10	38.3	295.4	2.2	4	20.6	144.8
	106	3	6.5	25	83.3	730.8	6.3	15	53.3	503.6	5.7	10	33.3	289	6.5	10	31.7	291	6.8	13.2	36.7	334.8	7.2	17.9	41.5	405.4
	107	1	2.3	4.9	10.3	119.3	3.6	3.8	19.5	172.3	3.7	8.3	16.1	182	4.4	5.2	16.3	155.6	2.3	3.8	10.4	97.6	2	5.2	16.5	137.3
	107	2	3	3.7	10	108.5	2.6	5	20	183	2.8	5	19.5	157	4.6	3.8	19.5	158.6	1.6	3.4	10.2	88.5	4	4.6	12	122
	107	3	1.7	5	11.5	122.9	3.2	0.3	30	187.7	4	6.7	26.2	212	3.4	5	22.7	180.3	2.7	4.6	6.4	89.7	2	5.2	16.5	137.3
	108	1	6.8	18.3	61.7	550.2	4.9	20	55.5	564.7	7.1	34.2	56.8	657.3	3.4	18.1	45	422.8	4.2	26.8	55	538.6	3.3	15	33.4	318.5
	108	2	4.5	11.7	23.3	272.2	6.6	16.7	51.7	516.1	7.1	34.2	56.8	657.3	5.7	6.6	33.2	260.6	6.1	16.6	59.9	469.1	3.7	5	29.4	202.7
	108	3	8.2	36.7	80	852.6	7.5	27.6	75	774.5	8.5	68	93.4	1185.4	6.2	20	46	461.1	8.3	23.4	76.5	623.9	5	27.4	61.7	579.2
	109	1	5	15	40	395	7.2	31.9	56.8	722.8	6.6	16.7	54.6	460.8	6.9	20	55	509.7	8.5	24	65	579.2	5.3	18.3	55.8	463.3
	109	2	7	13.3	43.3	404.6	7.2	23.3	65	668.9	4.8	11.8	42.9	345.6	6.1	6.7	46.5	330.1	6.4	13.1	46.7	376.5	6.7	16.4	51.9	434.4
	109	3	6.3	20	45.9	487.2	6.4	30	63.3	731.6	6.1	19.6	35	400	6.2	20	46	461.1	8.3	23.4	76.5	623.9	5	27.4	61.7	579.2
	110	1	3.3	10	25	254.5	5.5	10	38.5	359.7	6	8.2	61.7	399.8	7.2	17.3	49.7	457.5	6	6.7	33.1	249	4.9	6.8	36.8	260.6
	110	2	6.2	6.7	36.7	294.2	3.7	8.3	26.6	264.1	4.5	8.6	16.7	192.4	7.2	13.3	45	393.8	6.1	9.9	16.9	208.5	5.6	7.4	28.2	231.7
	110	3	5.5	8.3	44.2	345.1	7.1	8.3	36.3	337.5	5.9	20.2	50	472.8	5.5	10	46.5	359.8	3.6	2.4	22.3	144.1	3.7	5	29.4	202.7
	111	1	1.3	2.3	10	83.3	3	3.7	10	115.9	1.6	5.1	11.3	114.2	2.3	4.8	10.1	109.8	3.6	4.9	14.6	134.2	2.7	1.6	6.7	61
	111	2	3	2.3	11.5	100.7	2.3	3.7	11.4	119	3.6	4.9	10.7	121.3	1.8	5	13.8	128.1	1.6	5	11.3	109.8	2	4	9	91.5
	111	3	3.2	3.7	18	149.7	2.7	3.6	11.7	122	2.3	3.5	6.8	81.1	2	3.8	11.6	106.3	2	5.8	13.5	129.9	2	4	9	91.5
	112	1	3.1	2.3	13.5	111.4	3.2	2.3	18.3	146.4	4.1	8.2	21.4	207	3.2	4.9	15.1	140.3	2.3	3.6	8.2	85.4	4	4.6	12	122
	112	2	5.1	6.7	13.3	170.4	3.6	5	16.7	170.8	4	10	30	264.1	1.4	3.4	10.1	91.5	2	4	9	91.5	4	4.6	12	122
	112	3	1.7	5	11.6	123	2.7	5	11.6	137.7	4.3	8.3	36.7	278	2.3	2.6	19.5	135.3	2.4	1.1	7.8	59.3	2.5	2.5	13.4	99.1
	113	1	2.8	3.7	23	172.8	4	5.2	15.3	167.8	1.8	2.9	9.8	85.6	1.7	5.1	11.3	115.9	1.4	2	8.8	67.1	2	4	9	91.5
	113	2	3.6	3.7	16.6	145.3	3.7	3.8	19.8	174.6	1.6	3.7	12.6	105.3	2	2.5	8.6	77.8	2.1	2.4	10.7	83.9	2.5	2.5	13.4	99.1
	113	3	2.8	8.3	23.3	224.5	2.8	3.7	12.5	128.3	2.4	4	10.8	105.2	1.5	1	7.8	56.5	2	3.1	5.2	65.4	1.2	3.5	7.7	76.3
	114	1	5.8	13.3	36.7	364.8	6.4	13.3	46.7	448.3	5.2	11.6	53.3	393	5.8	19	55.8	498.1	4.5	13.3	31.9	301.2	7.2	17.9	41.5	405.4
	114	2	5.8	13.3	43.3	397.2	6.7	26.6	48.3	611.6	6.7	25	83.3	677.6	5.7	26.7	52.1	556	3.7	11.7	46.7	347.5	5.3	18.3	55.8	463.3
	114	3	4.3	8.3	38.3	308.6	6	20	35	458.4	7	23.2	56.7	540.9	3.4	16.7	53.3	450.5	3.6	9	25.6	225.1	6.9	13.6	45	376.5
	115	1	4.1	8.3	20	215.9	5.8	6.7	33.2	294.3	2.7	6.8	23.4	192.7	3.6	4.9	29.9	216.6	3.4	5	22.7	170.8	4.7	8.4	33.2	259.3
	115	2	5.1	6.7	13.3	170.4	6.4	6.7	20	225.7	2.8	8.3	15	171.3	3.2	5.4	16.5	152.5	3.6	4.9	14.6	134.2	2.5	4.9	26.7	183
	115	3	4.2	10	20	235.2	4.9	10	28.3	300.3	4.4	5	20	168.7	3.5	6.8	18.5	177.9	3.1	4.9	31.4	207.3	5.7	4.8	33.2	228.8
	116	1	7	36.7	56.5	728.2	5.4	16.7	50.8	503.9	6.7	27.8	61.7	609.9	7.3	23.1	60	567.6	4.2	10.2	41.7	312.8	7.2	17.9	41.5	405.4
	116	2	8	36.7	83.2	867.9	7	15	40	434.4	7.5	14.8	66.9	501.4	6.1	26.7	63.3	613.9	6.7	14.9	33.3	335.9	7.2	17.9	41.5	405.4
	116	3	4.8	20	55.8	527.8	5.2	10	26.6	292.4	7	16.6	43.3	411.4	6.9	33.4	65	693.8	4.3	16.9	45	395.2	3.7	8.1	16.1	173.8
	117	1	2	1	8.4	64.9	2.1	5	10.6	128.1	2.7	4.6	6.3	92.8	1	3.3	5.8	67.1	3.6	4.9	14.6	134.2	2.7	1.6	6.7	61
	117	2	3	3.7	10	108.5	3.1	3.7	17.4	157.1	2.3	6.8	8.8	124.9	2.1	4.8	6	88.5	3.4	8.1	16.5	173.9	2.3	5	9.8	106.8
	117	3	1.3	1	8.4	60.9	3.1	2.3	13.4	118.9	2.6	3.5	9.2	93.9	1.5	1	7.8	56.5	3.7	8.3	26.3	221.9	1.2	3.5	7.7	76.3
	118	1	2.3	4.9	10.1	118.2	2.5	2.3	23.2	169.3	3.5	4.8	16.6	146.3	2.2	4.5	7.7	94.6	1.9	3	7.3	73.2	2.3	5	9.8	106.8
	118	2	3.2	5	20	174.3	2.5	6.7	21.2	208.9	3.5	4.8	16.6	146.3	3.5	3.7	15.3	131.2	2.4	3.3	10.7	94.6	2	5.2	16.5	137.3
	118	3	2.3	4.9	10	117.6	2.2	5	13.3	144.1	2.8	3.7	21.4	152	1.2	1.2	6.9	52.7	1.4	1	4.4	37.8	2.7	1.6	6.7	61
	119	1	7.7	36.7	83	865	7.5	33.1	66.7	792.3	8.3	36.7	90	840.3	4.8	21.9	48.7	486.5	6.5	38.3	71.7	741.3	7.9	35.9	65	695
	119	2	5	20	55.9	529.6	6.7	15	33.3	396.2	7	13.3	50	406.6	7.2	13.3	45	393.8	4.3	16.7	40	370.7	3.7	11.7	46.7	347.5
	119	3	6.3	30	64.5	690.2	3.7	5.3	35	275.5	7.2	17.3	49.7	448.4	7.1	20.3	40	438.4	5.8	26.1	58.3	555.3	5.6	7.4	28.2	231.7
	120	1	6.2	20	63	572.3	8.8	33.3	99	980	6.3	24.8	48.2	515	3.5	18.2	52.7	463.3	6	8.3	61.7	393.8	3.7	11.7	46.7	347.5
	120	2	8.7	33.3	57.6	706.1	8.9	61.5	91.7	1264.9	7.7	50	71.8	894.5	6.4	30	63.3	648.7	5.7	26.7	52.1	532.8	7.9	35.9	65	695
	120	3	4.6	6.7	33.3	268	9	49.8	93.3	1139.9	6.6	26.3	41.8	503.9	5.7	5.1	33.2	245.6	7.2	15	45	392	3.3	15	33.4	318.5
	121	1	5.2	25	50	556.1	4.3	15	26.5	344	6.6	28.3	66.7	637	4.9	10	28.4	266.4	5	11.5	53.3	382.3	7.4	5	44.2	289.6
	121	2	6.3	6.7	48.3	353.1	4	8.3	41.5	347.5	7.3	15	51.6	433.7	2.8	11.7	20.1	231.7	4.4	8.6	16.7	185.3	5.6	7.4	28.2	231.7
	121	3	5	28.3	61.7	649.6	4.3	6.7	26.7	249.5	7	16.6	43.3	411.4	2.6	3.2	11	100.2	3.7	3.7	19.4	144.7	3.7	8.1	16.1	173.8
	122	1	6.9	33.3	65	732.6	7	25	55.7	635.9	7.3	21.7	45	474.3	5.8	19	55.8	498.1	7	30.4	50	567.6	5.2	26.9	49.7	521.3
	122	2	6.3	30	79.4	765	7.2	15	51.7	500.4	7.3	15	51.6	433.7	3.5	18.2	52.7	463.3	3.7	11.7	46.7	347.5	5.3	18.3	55.8	463.3
	122	3	8.2	21.7	76.4	669.9	3.6	16.7	36.7	415.5	4.4	13.3	23.2	270.5	3.6	6.7	35	260	5.2	25.6	50	509.6	6.9	13.6	45	376.5
	123	1	6.7	23.3	52.8	560.5	8.2	46.4	76.6	1004.3	5.2	11.6	53.3	393	7.2	18.5	41.5	428.6	6.8	16.7	55	451.8	7.2	17.9	41.5	405.4
	123	2	5.9	31.7	46.7	617.9	8.8	30	75.5	813.2	7	6.7	38.3	284.6	7	13.2	50	417	6	8.3	61.7	393.8	3.7	11.7	46.7	347.5
	123	3	2.3	15	33.3	345.1	8.9	58.5	83.5	1185.1	3.6	10	31.7	269.2	7.6	27.6	75	689.3	7	10	31.6	280.9	3.7	11.7	46.7	347.5
	124	1	3.3	6.7	23	208.6	.	.	.	.	5.8	13.3	35	331.9	2.9	10	30.2	265.4	3.5	4.9	24.8	180	4.7	8.4	33.2	259.3
	124	2	4.4	8.3	16.7	201.4	3.2	13.7	30	341.6	.	.	.	.	6	6.7	28.2	237.9	4	8.3	20	195.2	.	.	.	.
	124	3	2.8	3.7	19.5	155	6	5	34.2	281.6	4.6	8.2	33.3	263.8	2.7	5	24.8	187.5	2.5	5.4	12.8	125.6	2.5	4.9	26.7	183
	125	1	3	2.3	13.5	110.8	1.8	5	13.9	144.9	3.4	3.6	11.6	110.6	1.4	2.2	8.8	73.2	2.4	3.3	10.7	94.6	2.3	5	9.8	106.8
	125	2	2.3	2.3	11.5	96.8	1.8	3.6	12.4	120.5	2.3	6.8	8.8	124.9	2.2	4.5	7.7	94.6	2	2.5	9	76.3	2.3	5	9.8	106.8
	125	3	2.4	1	6.7	58.8	2.2	2.2	11.2	100.2	1.6	1	4.9	42	1.6	0.3	6.7	44.6	2.2	6.8	8.8	119.6	1.2	0.9	8.4	53.4
	126	1	1.5	1.1	11.3	77.5	2.7	3.7	9.2	109.1	2.8	3.6	20	144.5	2.7	3.8	9.5	99.1	1.8	2.3	6.6	62.5	1.2	0.9	8.4	53.4
	126	2	2.8	3.7	13.3	124	2.4	5.1	26.6	219.6	2.5	4.9	18.6	149.9	1.8	5	13.8	128.1	2	5	9.5	103.7	4	4.6	12	122
	126	3	3	3.7	15	133.6	3.3	6.7	18.3	197.4	5.3	6.2	13.3	156.9	3.3	3.8	13	119.4	1.2	3.3	4.8	61.1	2.1	2.1	8	68.6
	127	1	5.8	13.3	36.7	364.8	8.2	46.4	76.6	1004.3	7.1	30	50	582.8	5	16.7	33.4	359.1	7.1	23.3	45.1	474.9	7.2	17.9	41.5	405.4
	127	2	6	5	34.2	261.9	6.9	46.5	50	851.4	5.6	17.8	58.8	485.2	5.6	5	34.9	252.5	7	15	40	368.4	3.5	8.2	36.7	266.4
	127	3	3.7	5	30	227.4	6.3	51.6	80	1071.1	6.8	19.7	58.2	509.8	6.4	8.3	55	390	6.2	20.3	46	444.2	4.9	6.8	36.8	260.6
	128	1	3	3.7	15	133.3	3.2	4.8	15.5	159.4	1.6	3.7	12.6	105.3	2.3	2.5	5.8	65.6	2	3.4	7.3	77.8	2.1	2.1	8	68.6
	128	2	4.5	5	20	182.1	3.5	6.7	18.5	199.8	3.1	3.7	8.6	96.4	2.8	3.7	14.8	125.1	1.7	3	9.6	82.4	2.3	5	9.8	106.8
	128	3	2.3	4.9	10	117.6	3.6	3.8	19.5	172.3	2	1.1	8.5	61.6	2	3.2	11.4	98.7	1.7	2.8	9.3	79.1	2.7	1.6	6.7	61
	129	1	5.8	20	66.7	588.4	6.4	13.3	46.7	448.3	5.2	11.6	53.3	393	3.8	16.7	53.2	451.8	5.3	8.3	34.8	268.7	7.2	17.9	41.5	405.4
	129	2	5.8	8.3	23.3	242.7	4	10	30	304.1	6.6	13.2	43.2	372.7	7.2	17.3	49.7	457.5	6	6.7	33.1	249	4.9	6.8	36.8	260.6
	129	3	7.2	16.7	68.3	568.4	6.3	13.3	48.3	456.1	6.3	13.2	48.3	393.7	5.6	16.7	41.7	403.6	4.7	6.7	33.3	242.7	3.7	11.7	46.7	347.5
	130	1	5.8	13.3	36.7	364.8	5.1	31.7	45	642.9	6.6	24.8	56.8	555.6	4.7	6.6	40	289.6	6.7	14.9	33.3	335.9	7.2	17.9	41.5	405.4
	130	2	4.6	15	35	367.8	5.4	16.7	50.8	503.9	7.2	13.3	31.7	325.3	4.2	10	38.3	312.8	4.2	10.2	41.7	312.8	7.2	17.9	41.5	405.4
	130	3	7.2	16.7	68.3	568.4	4.4	13.3	46.4	434.7	6.3	13.2	48.3	393.7	3.8	10	28.4	260.8	4.5	13.4	31.9	302.2	3.7	11.7	46.7	347.5
	131	1	7.2	30	59.8	672.3	6.5	16.7	54.7	531.7	6.7	27.8	61.7	609.9	7.2	18.5	41.5	428.6	5.3	8.3	34.8	268.7	7.2	17.9	41.5	405.4
	131	2	5.1	20	61.7	559	6.7	26.6	48.3	611.6	9	28.3	96.7	786.1	6.4	30	63.3	648.7	6.2	19.9	46	440.2	5.3	18.3	55.8	463.3
	131	3	8	41.7	73.3	873	6.9	16.5	61.6	570.2	8.3	21.6	76.5	620.8	7.2	28.3	51.4	575.9	4	15	35.1	329.9	6.7	16.4	51.9	434.4
	132	1	2.1	5	10.8	121.6	1.4	2.3	6.8	72.5	3.1	2.3	8.3	80.3	1.5	3.4	6.6	74.7	2	4	9.3	93	1.2	0.9	8.4	53.4
	132	2	2.5	5	13.1	135.6	2.3	2.3	20.7	154	1.8	2.6	9.8	82.1	2.1	4.8	6	88.5	1.7	3	9.6	82.4	1.2	3.5	7.7	76.3
	132	3	2.7	5	20	171.1	2.3	4.8	13.1	141	1.2	5.1	18.1	142.2	1.7	2.8	9.2	82.4	2.1	2.5	17.5	115.3	1	1	6.7	45.8
	133	1	7.3	15	58.3	500.2	7.5	18.3	46.4	510.8	2.9	10	30	257.5	3.8	16.7	53.2	451.8	7.1	8.4	26.7	243.3	7.4	5	44.2	289.6
	133	2	4.5	11.7	23.3	272.2	7	10	40	377	2.3	6.7	25	196.5	7.3	19.8	65.5	561.8	2.2	6.7	24.9	191.1	3.7	5	29.4	202.7
	133	3	5.2	11.7	53.3	426.3	4.5	13.3	31.7	354.4	3.2	3.5	18.6	139.7	6.7	30	50	583.5	2.1	5	11.1	111.4	2.2	4	20.6	144.8
	134	1	3.5	7	23.3	214.2	4.7	10	20	253.2	6.2	6.7	30	242.7	3	3.5	17.4	137.3	4.2	6.5	26.5	207.4	6	6.8	25	213.5
	134	2	3.5	2.3	23.3	162.7	6.4	6.7	20	225.7	7.1	8.3	26.7	249.8	1.8	5	13.8	128.1	3.4	5	22.7	170.8	2.5	4.9	26.7	183
	134	3	3.8	5.1	13.1	144.3	2.7	6.8	23.2	222.1	6.6	8.3	28.3	254.1	2.3	2.3	12.5	96.8	2.5	5	26.7	184.1	5.4	4.9	19.8	167.8
	135	1	3.2	8.3	14.2	181.3	3.1	3.7	17.7	158.6	3.3	8.1	16.3	178.4	2	5.4	16.5	146.4	3.4	5	22.7	170.8	4	4.6	12	122
	135	2	5	5.3	25	213	2.7	3.7	18.4	160.1	3.5	4.8	16.6	146.3	3.5	3.7	15.3	131.2	2.4	2.6	23.2	143.4	2	5.2	16.5	137.3
	135	3	4.2	5.3	25	208.5	2.3	5	13.2	144	3	2	23.4	144	3.4	3.6	11.6	110.7	3.7	5.6	33.3	226.2	1.9	3.7	8.1	83.9
	136	1	2.5	3.7	19.5	153	5.3	5	19.8	198.3	2.3	6.8	8.8	124.9	4.6	3.8	19.5	158.6	2	5	9.5	103.7	5.2	6.4	13.3	152.5
	136	2	2.8	3.7	11.7	116.2	3.2	2.3	18.3	146.4	2.1	4.8	6.1	90.6	3.2	4.9	15.1	140.3	2	5	9.5	103.7	4	4.6	12	122
	136	3	3	3.7	15	133.6	3.6	3.8	19.5	172.2	2	1.7	22.8	132.7	2.2	4.7	13.8	127.4	1.6	2	9.1	69.7	1.9	3.7	8.1	83.9
	137	1	4.3	10	30	285.9	5.2	13.3	26.7	330.9	6.3	8.3	31.7	267.6	3.6	4.9	29.9	216.6	3.4	5	22.7	170.8	4.7	8.4	33.2	259.3
	137	2	5.7	5	33.3	255.7	4.4	8.3	33.3	305	4.1	8.2	21.4	207	6	6.7	28.2	237.9	2.4	7	23.5	189.1	.	.	.	.
	137	3	5.6	5	40	288.7	3.6	5.5	23.2	212.7	5.5	5	29.9	220.2	2.5	5	21.7	171.2	3.4	3.6	11.6	106.9	5.4	4.9	19.8	167.8
	138	1	2.5	3.7	19.5	153	3.1	5	20	186.1	2.7	5.7	13.2	135.6	2.5	5	21.7	170.8	2.3	5	9.8	106.8	5.2	6.4	13.3	152.5
	138	2	3.5	2.3	23.3	162.7	1.6	8.3	17.5	201.3	2.8	8.3	15	171.3	2.5	5	21.7	170.8	4	4.6	12	122	2.5	4.9	26.7	183
	138	3	5.1	5.3	25	213.8	3.6	5	30	244	2.4	2.5	23.2	145.2	2.7	5	24.8	187.5	2	5	12.1	115.5	2.5	4.9	26.7	183
	139	1	3.4	18.3	33.3	388.4	6.2	6.7	36.7	316.2	7.5	9.8	48.4	365.9	4.9	10	28.4	266.4	6.1	9.9	16.9	208.5	7.4	5	44.2	289.6
	139	2	5.2	11.7	28.3	301.6	6.6	9.2	45.9	397.9	3.6	16.7	30	332	6.6	9.1	45.8	353.3	5.6	5	40	260.6	3.3	15	33.4	318.5
	139	3	7	11.7	26.7	304.5	7.1	8.3	36.3	337.5	4.4	13.1	40	344.1	3.7	8.3	26.2	232.8	5.2	8.8	18.4	199.3	3.7	5	29.4	202.7
	140	1	3.5	8.4	16.3	194.8	2.8	3.7	26.4	204.4	2.2	2.3	9.2	78.5	2.2	4.7	12.8	122	1.6	5	11.3	109.8	2	4	9	91.5
	140	2	2.6	6.7	21.7	197.6	2.5	6.7	21.2	208.9	3.4	3.6	11.6	110.6	2.8	3.7	14.8	125.1	3.5	3.7	15.3	125.1	2	5.2	16.5	137.3
	140	3	3.6	5	16.8	160.4	2.9	5	14.3	153.5	1	1	6.7	46.9	2.2	4.6	6.7	90.4	2.6	4.7	6.4	90.3	2.7	1.6	6.7	61
	141	1	2.3	5	11.7	127.4	2	5	19.5	176.9	2.2	2.3	9.2	78.5	1.8	2.2	6	61	2	1.2	6.4	51.9	2.7	1.6	6.7	61
	141	2	2.3	3.7	11.6	112.3	3.6	5	16.7	170.8	1.6	5.1	11.3	114.2	2.3	2.3	12.6	97.6	2.1	2.5	17.6	115.9	4	4.6	12	122
	141	3	1	3.5	5	69.5	3.6	3.8	19.5	172.3	1.2	2.4	7.8	67.2	1.1	3.2	5.5	65.3	1.8	2.4	5.1	56.8	2.7	1.6	6.7	61
	142	1	6.4	15	35	378.1	5.2	11.7	28.3	321.4	5.4	23.2	42.6	467.6	1.8	8.2	17.7	179.5	6.2	14.9	48.1	399.6	3.7	5	29.4	202.7
	142	2	5.2	26.7	49.7	573.7	5.4	16.7	50.8	503.9	6.8	26.4	46.8	528.6	6.6	13.3	43.2	382.3	7	26.6	53.3	544.4	7.2	17.9	41.5	405.4
	142	3	5.5	8.3	44.2	345.1	7	10	36.7	359	5.9	20.2	50	472.8	3.7	8.3	26.2	232.8	5.5	24	59.7	539	3.7	5	29.4	202.7
	143	1	4.8	5.3	18.3	178.2	3.6	3.8	19.5	172.3	3.4	6.8	18.4	174.9	2.3	2.3	12.6	97.6	2.2	2.4	14.3	100.7	2	5.2	16.5	137.3
	143	2	2.3	4.9	10.1	118.2	2.7	3.7	9.2	109.1	1.8	4.5	8.1	94.6	1	3.4	5.9	68.6	1.7	2.8	8.3	74.7	1.2	0.9	8.4	53.4
	143	3	2.5	5	11.7	128.3	2.8	8.3	21.7	231.8	1.7	2.3	20.7	127.8	1.4	2.2	8.8	73.2	2	3.1	5.2	65.4	1.2	3.5	7.7	76.3
	144	1	3.8	8.3	36.7	297.5	4.5	13.3	23.3	308.1	6.2	6.7	30	242.7	3.4	8.1	16.4	180	3.8	6.8	25	201.3	6.3	9	33.3	274.5
	144	2	6.4	8.3	28.3	271.2	5.5	10	38.5	359.9	3.5	8.3	28.3	235.5	5	5.7	25	207.4	6.4	6.3	28.3	225.7	5	13.3	32.1	305
	144	3	4.6	11.7	23.3	272.6	6.8	9.8	48.3	419	6.2	10	23.2	246.7	3.5	6.7	26.4	216.5	4.1	8.5	30	242.6	6.9	11.8	43.3	350.8
	145	1	1.4	2.3	6.7	67.4	2.8	2.3	8.2	88.5	3.6	4.9	10.7	121.3	1.4	3.4	10.1	91.5	2.3	3.8	10.4	97.6	1.1	1.1	3	30.5
	145	2	1.5	1.1	11.3	77.5	2.8	6.7	13.2	166.2	1.2	3.5	10.1	89.2	2.8	3.7	14.8	125.1	2.3	5	9.8	106.8	1.2	3.5	7.7	76.3
	145	3	1.2	0.7	6.7	48.1	2.2	5	20.7	184.9	2.7	3.8	9.5	98.6	2.5	2.5	9.1	82.8	2.1	1.7	22.3	129	1.1	1.1	3	30.5
	146	1	5.2	25	50	556.1	5.5	8.3	44.2	371.8	5.8	13.2	36.8	338.8	3.8	16.7	53.2	451.8	4.2	10.2	41.7	312.8	7.4	5	44.2	289.6
	146	2	6.9	33.6	65	735.6	7	18.4	55	556	6.8	13.2	36.6	344.2	6.8	26.5	46.8	532.8	4.3	16.7	40	370.7	5.3	18.3	55.8	463.3
	146	3	7.7	35	88.3	872.9	7	20	43.3	510.4	7	11.4	53	400.3	6	26.9	55	574.4	4.8	13.1	33.3	307.4	6.8	19.3	58.2	492.3
	147	1	3.5	2.3	18.6	139.1	6.5	10	33.3	337	1.4	2	9.3	71.4	1.3	3.2	6.3	70.2	1	3.4	6.8	70.2	1.2	3.5	7.7	76.3
	147	2	2.5	5	13.1	135.6	7.7	8.3	38.3	352.3	1.2	3.5	10.1	89.2	3	4.5	11.8	119	3.5	3.7	15.3	125.1	2.3	5	9.8	106.8
	147	3	1.4	2	10	80.2	3	15	41.7	420	2.6	3.5	9.2	93.9	2.2	2.4	14.3	106.7	1.9	2.8	7.3	71	1.2	3.5	7.7	76.3
	148	1	1.5	1	11.3	76.5	2.3	2.3	20.7	154	1.2	3.1	6.2	67.8	1.8	2.2	6	61	1.8	1.3	8.4	61	1.2	3.5	7.7	76.3
	148	2	1.3	3.7	5	73.6	2.9	3.7	21.5	178.4	1.4	2	9.3	71.4	1.8	2.2	6	61	2.4	3.3	10.7	94.6	1.2	3.5	7.7	76.3
	148	3	1.4	1	5.1	44.9	2.2	5	20.7	184.9	3	2.3	8.2	79.3	1.8	2	6.4	61.3	1.6	1.1	5	42.4	1.2	0.9	8.4	53.4
	149	1	3.6	3.7	16.6	145.6	3	3.7	18.4	161.7	3.3	3.7	13.1	117.8	3.2	4.9	15.1	140.3	3.4	5	22.7	170.8	5.2	6.4	13.3	152.5
	149	2	3.5	8.3	16.3	193.7	4.2	10	20	250.1	4	4.8	15.2	142.7	3.2	5.4	16.5	152.5	3.4	5	22.7	170.8	2.5	4.9	26.7	183
	149	3	3.8	5.1	13.1	144.3	2.1	8.3	15	190.8	1.4	3.5	10.1	90.7	3.1	2.4	17.3	126.2	3	4.9	26.5	184.9	4.5	5	12.2	129.6
	150	1	5.2	8.3	20	222.3	2.8	6.7	13.2	166.2	1.9	4.8	10.1	107.1	2.8	3.7	12.4	112.9	2.4	3.3	10.7	94.6	2	5.2	16.5	137.3
	150	2	3.7	5	16.7	160.8	3.7	3.8	19.8	174.6	2.8	2.5	9.1	83.9	3.1	3.2	19.5	144.9	2.1	2.4	10.7	83.9	2.5	2.5	13.4	99.1
	150	3	6	5	34.2	261.9	3.8	8.3	16.1	206.6	1.7	2.8	9.2	81	3.3	3.6	13.1	118.2	1.4	3.4	6.8	72.3	3.3	5.2	9.8	114.4
	152	1	2.5	3.7	19.5	153	3.2	8.3	14.1	192.2	4.2	6.7	20	185.6	2.2	4.7	12.8	122	1.6	5	11.3	109.8	5.2	6.4	13.3	152.5
	152	2	2.5	5	13.1	135.6	2.5	6.7	21.2	208.9	3.5	4.8	16.6	146.3	3.3	4.9	15.6	143.4	2.3	5	9.8	106.8	2	5.2	16.5	137.3
	152	3	3.5	2.3	18.5	139	2.7	3.7	20	168.9	2.3	10	18.2	200.7	2.4	4	10.6	105.1	2.3	4.7	10.2	105.4	2	5.2	16.5	137.3
	153	1	.	.	.	.	3.3	10	45	382.3	7.2	29.6	59.9	623.4	4.2	6.7	33.3	254.8	7.9	35.9	65	695	3.7	11.7	46.7	347.5
	153	2	6.9	10.8	40	360.4	7.2	18.3	41.4	481.3	6.2	15.2	48.1	413.4	5.3	8.3	34.8	283.8	5.5	28.6	70	631.3	3.3	15	33.4	318.5
	153	3	4.4	8.3	33.3	284.2	6.7	13.2	43.3	430.1	6.1	13.3	49.6	399.6	2.7	5	24.5	186.1	8.8	30.7	80	715.4	7.4	5	44.2	289.6
	154	1	5.4	23.3	42.5	501.6	6.5	5.3	28.3	255.4	3.5	5.5	23.2	183	1.8	8.2	17.7	179.5	7	21.1	56.5	503.9	2.2	4	20.6	144.8
	154	2	8.7	33.3	57.6	706.1	4.6	10	56.2	451.8	7.2	13.3	31.7	325.3	5.5	5	33.1	243.3	7.3	27.9	73.2	648.7	3.7	11.7	46.7	347.5
	154	3	6.3	30	64.5	690.2	6.2	13.3	35	382.7	4.5	15	30	319.7	4.2	5	22.7	184.4	6.6	27.2	83.2	682.7	5.6	7.4	28.2	231.7
	155	1	2.3	2.3	18.5	131.7	2.9	3.7	21.5	178.4	1.1	3.3	5.1	64.2	1.7	2.8	9.2	82.4	2.3	5	9.8	106.8	1.2	3.5	7.7	76.3
	155	2	4	5.3	15.3	158.8	2.7	3.7	22.8	184.5	3.3	3.7	13.1	117.8	2.8	3.7	12.4	112.9	2.3	5	9.8	106.8	2	5.2	16.5	137.3
	155	3	2.5	5	11.7	128.3	2.5	6.7	21.4	209.9	1	1	6.7	46.9	1.1	3.2	5.5	65.3	1.2	3.4	4.8	62.4	2.7	1.6	6.7	61
	156	1	4.4	10	20	236.3	4	5	26.8	228.8	2.7	6.8	23.4	192.7	3.3	4.9	15.6	143.4	2.4	7	23.5	189.1	6	6.8	25	213.5
	156	2	1.9	5	20	166.6	4.2	6.7	20	212	2.8	5.9	13.4	139.2	2.3	4.8	10.1	109.8	4.1	4.4	15.7	137.3	5.4	4.9	19.8	167.8
	156	3	2.8	8.3	23.3	224.5	2.9	8.4	23.1	240.9	3.6	5	24.9	186.3	2	5	9.7	108.5	3.4	8.1	16.3	172.9	5.4	4.9	19.8	167.8
	157	1	6.8	15	53.3	472.1	6.7	30	50	660.2	5.7	21.5	41.6	447.2	6.3	16.7	48.3	440.2	6	8.3	61.7	393.8	5	27.4	61.7	579.2
	157	2	5.8	20	66.7	588.4	9.1	26.7	73.3	764.5	6.8	26.4	46.8	528.6	3.8	16.7	53.2	451.8	7.3	27.9	73.2	648.7	7.9	35.9	65	695
	157	3	3.9	11.7	46.7	385.7	5.7	20.1	66.7	632.2	.	.	.	.	5.6	6.5	28.2	233.9	7	16.5	43.3	398.5	7.2	17.9	41.5	405.4
	158	1	2	5	10	117	1.6	5	11.3	129.6	1.1	3.3	5.1	64.2	1.3	3.2	6.3	70.2	2.2	2.4	14.3	100.7	1.2	3.5	7.7	76.3
	158	2	1.3	2.3	10	83.3	2.8	2.4	9.8	98.4	1.2	2.3	7.7	66	1.4	1.2	6.2	50.3	2	3.4	7.3	77.8	2.1	2.1	8	68.6
	158	3	1	3.5	5	69.5	2.1	5	11.1	131.5	1.1	3.3	5.6	66.4	1.3	2.4	7.8	69.3	5.2	6.2	13.3	150.5	2.1	2.1	8	68.6
	159	1	5.5	10	46.7	376.6	5.4	15	60	535.2	7	15	40	379.5	8.3	28.3	83.3	741.3	4.5	13.3	26.7	278	3.7	11.7	46.7	347.5
	159	2	5.8	10	38.7	338.4	4.9	11.6	43.1	399.6	2.9	10	30	257.5	8.5	30	86.7	776.1	7.4	5	44.2	289.6	7.4	5	44.2	289.6
	159	3	6.3	20	45.9	487.2	7	23.2	43.2	546.4	5.8	8.1	50	344.8	6.9	35	73.3	751.3	4.7	8.3	33.2	258.4	7.2	17.9	41.5	405.4
	160	1	1.9	5	20	166.6	3.6	5	16.7	170.8	3.6	4.9	10.7	121.3	2.6	3.8	10.5	103.7	1.6	5	11.3	109.8	4	4.6	12	122
	160	2	5	4	33.3	240.2	6.4	6.7	20	225.7	2.8	5.7	13.2	136.3	2.2	4.7	12.8	122	5.2	6.4	13.3	152.5	2.5	4.9	26.7	183
	160	3	6	10	16.7	229.9	3.6	5	30	244.1	3.6	2.4	22.4	147.5	2.6	4.6	11.6	117	3.1	3.6	18.2	135	2.4	5.7	20	160.1
	161	1	7.5	20	65.5	592.9	7	25	55.7	635.9	6.6	26.4	83.2	691.2	7.3	23.1	60	567.6	6.3	21.4	40	428.6	5.2	26.9	49.7	521.3
	161	2	6.5	13.3	48.3	426.6	4.9	11.6	43.1	399.6	8.8	31.7	80	745.4	4.7	6.6	40	289.6	6.2	6.7	36.7	266.4	7.4	5	44.2	289.6
	161	3	4.2	15	35	365.4	6.7	13.2	43.3	430.1	8.3	43.8	90	914.6	1.8	9.5	25.3	230.5	5	5.3	25	193.1	7.4	5	44.2	289.6
	162	1	2.6	21.7	28.3	395.7	3.7	5	29.7	243.3	6.7	25	83.3	677.6	4.2	6.7	33.3	254.8	3.8	3.7	23.2	162.2	3.3	3.9	13	115.8
	162	2	6.2	6.7	36.7	294.2	4	8.3	41.5	347.5	6.1	26.7	50	542.1	2.8	11.7	20.1	231.7	4.3	16.7	40	370.7	5.6	7.4	28.2	231.7
	162	3	7.4	23.3	61.7	609	3.7	15	35	387.3	8.9	58.5	83.5	1043.4	5.6	5	40	278.1	5	5.3	25	193.1	7.4	5	44.2	289.6
	163	1	2.8	8.3	23.3	224.4	5.5	10	46.7	404.8	3.5	5.5	23.2	183	3.7	9	25.8	237.5	4.9	10	40	307	3.7	5	29.4	202.7
	163	2	7	23.3	43.3	514.9	4.9	11.6	43.1	399.6	5.7	21.5	41.6	447.2	7.2	18.5	41.5	428.6	5	11.5	53.3	382.3	7.4	5	44.2	289.6
	163	3	4.8	20	55.8	527.8	4.3	20	58.4	577	4.3	21.6	41.7	440.3	7	16.5	46.2	430.8	4.9	19.7	53.3	463.8	5.2	26.9	49.7	521.3
	164	1	3.6	5	10.8	130.9	3.6	5	25	216.6	3.3	3.7	13.1	117.8	2.3	2.5	19.5	134.2	2.6	3.6	20	140.3	5.2	6.4	13.3	152.5
	164	2	3.2	5	20	174.3	4.1	8.3	20	230.3	2.3	2.3	20.9	132	2.7	3.6	20	149.5	4.4	5.2	16.3	149.5	5.4	4.9	19.8	167.8
	164	3	2.6	5	6.8	104.8	3.4	2.3	23.3	175.1	3.2	5.3	16.5	149.1	3.3	5.2	9.8	117.4	1.6	3.5	10.2	89.5	2	6.1	16.2	144.9
	165	1	5.8	20	66.7	588.4	6.1	13.3	49.6	462.2	7.3	21.7	45	474.3	3.8	16.7	53.2	451.8	4.2	14.9	41.6	359.1	7.2	17.9	41.5	405.4
	165	2	6.5	16.7	46.7	456	5.5	21.3	60	608.1	8.8	31.7	80	745.4	4.3	18.7	53.3	474.9	6.8	18.3	61.7	498.1	5.2	26.9	49.7	521.3
	165	3	7	35	56.7	710.5	3.7	18.3	52.7	522.7	7.1	30	50.2	583.8	4.8	6.8	36.8	275.9	3.6	9	25.6	225.1	6.9	13.6	45	376.5
	166	1	7	28.3	55	628.1	6.3	21.7	40	507.4	7	13.3	50	406.6	4.9	10	40	324.3	4.5	13.3	26.7	278	3.7	11.7	46.7	347.5
	166	2	8.6	46.7	84	985.6	7.8	26.5	56.8	663.7	6.6	28.3	66.7	637	3.8	16.7	53.2	451.8	4.2	14.9	41.6	359.1	5.2	26.9	49.7	521.3
	166	3	8.5	46.6	70	913.5	5.2	16.7	46.7	479.8	7	23.2	56.7	540.9	4.7	15	30	323.5	6.4	8.3	39.8	297.3	6.9	13.6	45	376.5
	167	1	5.9	31.7	46.7	617.9	6.4	13.3	48.3	457	4.2	25	55	535.3	4.5	8.2	33.5	272.2	3.7	4.8	35	225.9	4.9	6.8	36.8	260.6
	167	2	7.3	21.7	45	507.5	5.2	11.7	28.3	321.4	9	23.3	91.7	711.5	3.5	5	24.7	191.1	4.8	10	35	283.8	3.7	5	29.4	202.7
	167	3	6.8	30	51.7	629.3	6.3	15	48.2	475.3	8.4	50	70	890.2	2.7	7	23.5	201.2	.	.	.	.	3.3	15	33.4	318.5
	168	1	2.8	5	15	146.4	1.6	5	11.3	129.6	1.2	3.1	6.2	67.8	2.1	1.2	6.5	54.9	1.3	1.1	10.2	64.1	1.2	3.5	7.7	76.3
	168	2	2.8	3.7	13.3	124	3.2	2.3	18.3	146.4	3.1	3.7	8.6	96.4	1.4	3.4	10.1	91.5	2	4	9	91.5	4	4.6	12	122
	168	3	3.6	5	16.8	160.4	2.3	5	13.2	143.9	2.7	4.5	6.1	90.8	2.1	2.2	8	72.4	3.1	1	19.8	116.1	2.3	5	9.8	106.8
	169	1	4.2	6.7	26.7	232.4	4	8.3	41.5	347.5	7	5	33.3	244	5.7	26.7	52.1	556	6.2	19.9	46	440.2	5.6	7.4	28.2	231.7
	169	2	4.6	15	35	367.8	6.6	27.8	61.7	698.5	7.2	13.3	31.7	325.3	7.3	23.1	60	567.6	6.8	16.7	55	451.8	7.2	17.9	41.5	405.4
	169	3	7.2	16.7	68.3	568.4	7.1	28.3	73.1	770	6.7	26.3	41.8	504.7	9	28.3	96.7	811.7	8.8	32.6	57.6	633.7	5.2	26.9	49.7	521.3
	170	1	6	20	50	506.1	6.6	10	34.8	345.8	6.7	14.8	63.5	481.1	4.5	8.2	33.5	272.2	6.4	8.2	55	364.9	4.9	6.8	36.8	260.6
	170	2	7.3	15	58.3	500.2	6.7	30	50	660.2	7.2	29.6	59.9	623.4	7	13.2	50	417	6.6	28.9	66.7	625.5	5	27.4	61.7	579.2
	170	3	7	23.3	50	548.1	7.3	12.5	51.7	471.8	5.5	29.5	70	657.8	3.2	15	50	415.7	7.8	13.2	41.7	362.6	6.8	19.3	58.2	492.3
	171	1	2.1	4.9	6.5	99.2	1.8	5	8.1	112.9	2.2	2.3	9.2	78.5	1.3	3.3	4.9	64.1	2	2.8	9	79.3	2	4	9	91.5
	171	2	3	2.4	9.8	93	3.1	3.7	17.4	157.1	1.2	3.5	10.1	89.2	2.8	3.7	14.8	125.1	2.4	3.3	10.7	94.6	2.3	5	9.8	106.8
	171	3	2.3	4.9	10	117.6	2.3	5	13.2	143.9	2.7	4.5	6.1	90.8	2	5.1	10.6	114.2	2.2	4.5	20.6	149.7	2.3	5	9.8	106.8
	172	1	2.2	2.3	9.2	84.8	2.1	2.5	10.1	96.8	2.3	3.4	11.6	101.7	2.2	3.8	11.2	105.2	4.5	5	12.2	129.6	1.2	0.9	8.4	53.4
	172	2	3.5	2.3	23.3	162.7	3.6	5	16.7	170.8	2.8	5	19.5	157	3.2	5.4	16.5	152.5	2.9	3.5	17.1	128.1	4	4.6	12	122
	172	3	3.5	2.3	18.5	139	3.8	2.3	13.3	122.2	2.2	4.5	20.7	153.5	1.8	2.4	4.9	57.3	6.1	9.5	16.9	204.7	1	1	6.7	45.8
	173	1	1.7	1	4.9	45.9	1.3	2.4	7.7	77.8	3.5	4.8	16.6	146.3	2	2.4	8.5	76.3	2.8	3.7	14.8	119	1	1	6.7	45.8
	173	2	1	5	13.3	127.8	3.2	8.3	14.1	192.2	4.2	6.6	26.6	214.1	2.3	4.8	10.1	109.8	2.9	3.5	17.1	128.1	5.2	6.4	13.3	152.5
	173	3	2.2	3.7	6.5	86.6	3.3	3.7	13.1	134.5	3.5	5	31.5	215.1	2.1	2.2	8	72.4	2.2	4.5	20.6	149.7	2.3	5	9.8	106.8
	174	1	2.3	4.9	10.3	119.3	2.7	6.7	23.2	221.1	3.4	6.8	18.4	174.9	2.7	3.5	10.4	100.7	3.5	3.7	15.3	125.1	2	5.2	16.5	137.3
	174	2	1.4	2.3	6.8	67.8	2.7	5	24.5	208.2	2	5	10.6	112.4	2.2	1	7.7	59.5	1.1	3.3	5.9	65.6	2.1	2.1	8	68.6
	174	3	2.3	4.9	10	117.6	4.2	8.3	21.4	238	2.9	6.2	16.9	158.6	2.1	2.2	8	72.4	3.1	1	19.8	116.1	2.3	5	9.8	106.8
	175	1	2.8	1.7	23.3	151.8	4	5.3	20	195.2	2.3	2.3	13.8	99.9	2.3	4.8	10.1	109.8	2	5	9.5	103.7	4	4.6	12	122
	175	2	2.3	2.3	18.5	131.7	5	4	33.3	259.3	2.7	5.7	13.2	135.6	2.3	2.5	19.5	134.2	1.6	5	11.3	109.8	5.2	6.4	13.3	152.5
	175	3	3.2	3.7	18	149.7	2.3	7	17.5	190.9	2.8	2.2	9.1	80.6	2.2	2.5	5.8	64.9	1.9	2.4	8.5	72.5	2.3	5	9.8	106.8
	176	1	2.5	3.7	11.7	114.3	2.1	2.5	10.1	96.8	2.8	3.8	14.8	123.1	1.6	1.1	5	44.2	3.4	4.4	13.5	123.5	1.2	0.9	8.4	53.4
	176	2	2.5	5	13.1	135.6	2.7	3.7	18.4	160.1	5.4	6.7	28.7	232	2.2	4.5	7.7	94.6	3.5	4.9	24.8	180	2	5.2	16.5	137.3
	176	3	2.3	4.9	10	117.6	2.8	5	19.5	181.5	3.5	5	31.5	215.1	2.2	2.5	5.8	64.9	2.2	4.5	20.6	149.7	2.3	5	9.8	106.8
	177	1	3.8	8.3	28.3	256	4.5	13.3	26.7	326.7	3.6	5.1	31.5	216.9	4.5	15	35	347.5	4.3	16.7	40	370.7	3.3	3.9	13	115.8
	177	2	6.5	13.3	48.3	426.6	5.4	16.7	50.8	503.9	6.8	26.4	46.8	528.6	6.8	17.9	61.7	521.3	8	33.3	78.4	729.8	7.2	17.9	41.5	405.4
	177	3	4.4	8.3	33.3	284.2	.	.	.	.	4	5	26.7	196.8	7	4.9	33.1	249.4	6.7	40.3	75	777.4	3.7	8.1	16.1	173.8
	178	1	1.8	1	5	46.9	1.2	3.3	6.6	81.6	1	1	4.7	37.5	2.3	3.6	7.9	86.9	1.8	2.3	6.6	62.5	1	1	1.6	22.9
	178	2	2.1	4.8	6.5	98	2	5	10	124.9	2.3	1	6.7	54.6	1.1	1	3.8	34.5	1.6	2	5.3	52.8	0	1	1.5	16.8
	178	3	1	3.5	5	69.5	1.8	2.5	10.5	97.1	1.3	1.1	11.2	69.6	1.9	2.4	9	78.4	1.3	2.4	7.8	66.2	1.2	1.4	3.9	38.1
	180	1	7.1	8.3	36.7	317.8	5	6.7	20	217.2	4	4.8	12.1	128.8	2.1	4.5	8.6	98.5	5.9	13.2	36.8	330.1	2	4.3	7.3	86.9
	180	2	4	8.3	41.7	323.7	6.8	15	63.6	563	7	6.7	38.3	284.6	5.5	5	33.1	243.3	6.3	16.5	48.3	417	3.7	11.7	46.7	347.5
	180	3	5.8	8.3	23.5	243.6	5.8	26.6	58.3	661.4	6	6.7	28.3	233.8	3.8	5	14.8	143.2	6.8	15	53.4	427.9	5.6	7.4	28.2	231.7
	181	1	2.4	3.7	11.5	112.7	2.1	4.9	6.3	103.7	2.3	2.3	13.8	99.9	2.3	4.8	10.1	109.8	2.3	3.6	8.2	85.4	2.7	1.6	6.7	61
	181	2	2.3	3.7	11.6	112.3	2.6	4.6	11.7	132.7	1.2	3.5	10.1	89.2	2.2	4.5	7.7	94.6	2	5.4	10.6	112.9	2.3	5	9.8	106.8
	181	3	2.5	5	11.7	128.3	3.3	4.9	15.7	162.7	2	5	18.4	147.3	2	5.1	10.6	114.2	2.2	4.7	10.2	104.9	2.3	5	9.8	106.8
	182	1	7.9	16.7	70	581.1	7.4	19.8	65.5	632.5	8.7	31.8	76.8	731.8	8.6	26.9	58.1	602.3	5.6	23.9	53.3	509.7	5	27.4	61.7	579.2
	182	2	6.5	13.3	48.3	426.6	7.3	23.1	60	639.4	8.6	26.9	58.3	596.3	4.9	10	40	324.3	4.3	16.7	40	370.7	5.3	18.3	55.8	463.3
	182	3	6.4	13.3	48.3	426.3	6.6	24.8	56.7	636.8	7.6	41.7	63.3	768.1	5.5	23.3	59.7	559.3	4	8.3	41.3	291	5.3	18.3	55.8	463.3
	183	1	5.2	16.7	46.7	448.7	5.4	16.7	50.8	503.9	7.3	21.7	45	474.3	3.8	16.7	53.2	451.8	5	11.5	53.3	382.3	7.2	17.9	41.5	405.4
	183	2	6.5	13.3	48.3	426.6	7	18.4	55	556	7	15	40	379.5	5.8	13.2	35	335.9	6.9	20.1	55	486.5	5.3	18.3	55.8	463.3
	183	3	5.7	26.7	52.1	588.7	4.8	21.9	48.7	548.7	7.1	23.1	65	577.9	8	15	58.1	480.7	7.7	25	65	584.7	6.7	16.4	51.9	434.4
	184	1	7.3	15	58.3	500.2	4.9	20	55.8	566.4	5.2	11.7	35	311.7	3.8	16.7	53.2	451.8	7.4	5	44.2	289.6	7.4	5	44.2	289.6
	184	2	6.5	16.7	46.7	456	7.4	28.5	73.2	774.9	6.4	13.3	48.3	395.7	7.1	31.8	56.7	637.1	5.2	26.9	49.7	521.3	5.2	26.9	49.7	521.3
	184	3	4.2	15	35	365.4	7	21.6	56.6	601.7	3.6	9	25.8	232.2	7	16.7	53.3	468.6	5	5.3	25	193.1	7.4	5	44.2	289.6
	185	1	5.2	25	50	556.1	5.5	8.3	44.2	371.8	5.4	18.2	61.8	501.5	4.7	6.6	40	289.6	4.7	6.7	28.3	220.1	7.4	5	44.2	289.6
	185	2	5.8	10	38.7	338.4	4.6	10	56.2	451.8	6.3	24.8	48.2	515	5.5	5.1	39.9	278	6.2	19.9	46	440.2	3.7	11.7	46.7	347.5
	185	3	6.3	16.7	45	446.6	6	15	33.3	391.8	8.8	32.3	57.6	651.2	5.5	8.4	26.7	244.9	7	19.7	66.7	535.7	3.7	11.7	46.7	347.5
	186	1	6.9	33.3	65	732.6	8.4	19.9	75	691.5	7.3	21.7	45	474.3	5.8	19	55.8	498.1	7	30.4	50	567.6	5.2	26.9	49.7	521.3
	186	2	6.5	13.3	48.3	426.6	6.7	26.6	48.3	611.6	7	15	40	379.5	4.8	21.9	48.7	486.5	6.9	20.1	55	486.5	5.3	18.3	55.8	463.3
	186	3	8.3	25	65	649.6	5	22.8	75.2	705.6	3	15	41.7	363	7	18.4	55	494.3	6.7	24.7	68.3	591.2	5.2	26.9	49.7	521.3
	187	1	2.6	1	7.8	65.9	1.4	3.6	5	77	1.6	3.7	12.6	105.3	0.9	1	3.5	32	1	1	2.6	27.1	1.2	1.4	3.9	38.1
	187	2	2.3	2.3	18.5	131.7	2.3	5	13.1	143.4	4.1	8.2	21.4	207	1.7	3.5	7.2	79.3	2.1	2.5	17.6	115.9	2	4	9	91.5
	187	3	3.3	8.3	14.1	181.7	2.2	4.9	10.1	125.1	3.5	5	31.5	215.1	2.3	3.1	11	97.5	3.1	1	19.8	116.1	2.3	5	9.8	106.8
	188	1	6.5	6.7	40	312.6	6.6	9.2	45.9	397.9	5.7	23.5	53.5	521.8	5.5	21.1	60	538.6	4.1	18.3	53.4	446	3.3	15	33.4	318.5
	188	2	1.6	8.3	18.1	191.3	6	6.7	33.2	295.4	1.8	8.2	17.6	176.2	4.9	10	28.4	266.4	6.2	6.7	36.7	266.4	3.7	8.1	16.1	173.8
	188	3	6.2	10	23.3	263.9	5.2	8.3	34.8	318.4	7.2	17.3	49.7	448.4	7	21.6	56.5	533.6	4.3	6.9	18.8	177.4	5.6	7.4	28.2	231.7
	189	1	3.4	18.3	33.3	388.4	4.3	15	26.5	344	5.2	11.7	35	311.7	5	16.7	33.4	359.1	7.1	23.3	45.1	474.9	7.4	5	44.2	289.6
	189	2	7.2	17.5	50	485.5	7.8	26.5	56.8	663.7	6.6	28.3	66.7	637	6.6	13.3	43.2	382.3	6.8	18.3	61.7	498.1	5.2	26.9	49.7	521.3
	189	3	3.8	8.3	26.7	247.7	4.6	16.7	50	494.5	6.8	25	50	528.4	.	.	.	.	5.7	23.1	53.5	503.1	7.4	5	44.2	289.6
