# Supplementary material for: Identification and Validation of a Major Quantitative Trait Locus for Adult Plant Resistance Against Leaf Rust From the Chinese Wheat Landrace Bai Qimai
Source: Front Plant Sci. 2022 May 18;13:812002. doi: 10.3389/fpls.2022.812002 (PMC9158542; doi:10.3389/fpls.2022.812002)
Supplement: Supplementary file 3 [file Table_3.XLSX]

## Sheet: Table S3
	Supplementary Table 3 | Chromosome linkage map of the Nugaines × Bai Qimai mapping population.
	Count	Linkage group	Sub-count	Marker name	Position (cM)
	1	1A	1	IWB2454	0
	2	1A	2	IWA1602	0.6
	3	1A	3	IWB68907	2.4
	4	1A	4	IWB65288	2.5
	5	1A	5	IWB65291	3.3
	6	1A	6	IWA5150	4.8
	7	1A	7	IWB63542	5.8
	8	1A	8	IWB20687	6
	9	1A	9	IWB32244	6.1
	10	1A	10	IWB73128	8.1
	11	1A	11	IWB11162	9.5
	12	1A	12	IWB74452	9.7
	13	1A	13	IWB59322	10.4
	14	1A	14	IWB11615	12.2
	15	1A	15	IWA2452	14.1
	16	1A	16	IWB49628	15.3
	17	1A	17	IWB73615	16.6
	18	1A	18	IWB23539	16.7
	19	1A	19	IWB72794	17.3
	20	1A	20	IWB12336	20.6
	21	1A	21	IWB50401	21.8
	22	1A	22	IWB9029	22.8
	23	1A	23	IWB12251	30.5
	24	1A	24	IWB54638	30.6
	25	1A	25	IWA513	31.4
	26	1A	26	IWB22005	32
	27	1A	27	IWA6941	37.4
	28	1A	28	IWB60704	37.6
	29	1A	29	IWB11970	38
	30	1A	30	IWB74474	38.1
	31	1A	31	IWB49291	38.9
	32	1A	32	IWB75091	39
	33	1A	33	IWB9220	39.6
	34	1A	34	IWA3160	46.8
	35	1A	35	IWB62035	46.9
	36	1A	36	IWA6044	47
	37	1A	37	IWB13493	47.6
	38	1A	38	IWB35297	48.2
	39	1A	39	IWB36259	49.1
	40	1A	40	IWB54845	49.4
	41	1A	41	IWB31877	51.5
	42	1A	42	IWA7677	52.8
	43	1A	43	IWB27889	53.1
	44	1A	44	IWB53037	53.8
	45	1A	45	IWB12529	55
	46	1A	46	IWB35945	56.1
	47	1A	47	IWB61264	56.7
	48	1A	48	IWB31887	57.8
	49	1A	49	IWB22767	57.9
	50	1A	50	IWB65579	58.8
	51	1A	51	IWA5310	59.1
	52	1A	52	IWB45397	59.3
	53	1A	53	IWB74868	60
	54	1A	54	IWB63891	60.8
	55	1A	55	IWB64893	61.3
	56	1A	56	IWB27914	62
	57	1A	57	IWB7022	62.4
	58	1A	58	IWB65944	62.9
	59	1A	59	IWB57702	63.3
	60	1A	60	IWB40291	63.7
	61	1A	61	IWB43491	63.8
	62	1A	62	IWB7231	66
	63	1A	63	IWB43025	71.3
	64	1A	64	IWA4283	72.2
	65	1A	65	IWB6769	73.1
	66	1A	66	IWA5174	74.1
	67	1A	67	IWB13258	74.5
	68	1A	68	IWB65763	74.9
	69	1A	69	IWB11883	75.3
	70	1A	70	IWA6553	75.6
	71	1A	71	IWB41966	75.9
	72	1A	72	IWB56353	76
	73	1A	73	IWA8101	76.3
	74	1A	74	IWB25443	76.4
	75	1A	75	IWA4511	76.6
	76	1A	76	IWB10382	77.9
	77	1A	77	IWB40044	78.1
	78	1A	78	IWA162	79
	79	1A	79	IWB44726	80.2
	80	1A	80	IWB64537	81.4
	81	1A	81	IWA7871	81.9
	82	1A	82	IWB55587	82
	83	1A	83	IWB51039	82.4
	84	1A	84	IWB11708	82.7
	85	1A	85	IWB11543	83.2
	86	1A	86	IWA2490	84.5
	87	1A	87	IWA2488	85.3
	88	1A	88	IWA3406	86.5
	89	1A	89	IWB46448	86.8
	90	1A	90	IWA2703	87.2
	91	1A	91	IWB35171	87.5
	92	1A	92	IWB45961	87.6
	93	1A	93	IWB60627	88
	94	1A	94	IWA6729	88.1
	95	1A	95	IWB7257	88.9
	96	1A	96	IWB50908	91.1
	97	1A	97	IWB45451	92.5
	98	1A	98	IWA6341	94.1
	99	1A	99	IWB38589	95.4
	100	1A	100	IWB60784	95.5
	101	1A	101	IWA5533	95.6
	102	1A	102	IWA3980	96.9
	103	1A	103	IWA6176	98.1
	104	1A	104	IWA4080	98.2
	105	1A	105	IWA530	98.4
	106	1A	106	IWA7639	98.5
	107	1A	107	IWA3340	99.5
	108	1A	108	IWA3405	99.7
	109	1A	109	IWA7145	100.3
	110	1A	110	IWA339	100.4
	111	1A	111	IWB35531	104.2
	112	1A	112	IWB2243	104.6
	113	1A	113	IWB14141	104.7
	114	1A	114	IWB9628	105.8
	115	1A	115	IWB45987	106.8
	116	1A	116	IWB60140	107.4
	117	1A	117	IWA577	108.5
	118	1A	118	IWB6984	108.6
	119	1A	119	IWB54196	109.6
	120	1A	120	IWA1081	110.1
	121	1A	121	IWB11109	115.2
	122	1A	122	IWB20162	116.2
	123	1A	123	IWB35304	116.8
	124	1A	124	IWA5046	117.1
	125	1A	125	IWB884	119.1
	126	1A	126	IWB53469	119.2
	127	1A	127	IWA7754	120.4
	128	1A	128	IWB4042	121.3
	129	1A	129	IWA3805	121.6
	130	1A	130	IWB61497	122.3
	131	1A	131	IWA136	122.4
	132	1A	132	IWB3160	122.7
	133	1A	133	IWB8121	123
	134	1A	134	IWB59500	125
	135	1A	135	IWA6081	125.4
	136	1A	136	IWB14323	126
	137	1A	137	IWA3485	126.3
	138	1A	138	IWB74107	127.3
	139	1A	139	IWA672	127.5
	140	1A	140	IWB51468	127.8
	141	1A	141	IWB64453	128.1
	142	1A	142	IWB61091	128.2
	143	1A	143	IWB4214	129
	144	1A	144	IWB36475	129.9
	145	1A	145	IWB2446	131.2
	146	1A	146	IWB11057	131.9
	147	1A	147	IWB43028	132.3
	148	1A	148	IWB50952	133.7
	149	1A	149	IWB7275	137.8
	150	1A	150	IWB73664	142.5
	151	1A	151	IWB29142	142.9
	152	1A	152	IWA5317	143
	153	1A	153	IWB9474	143.3
	154	1A	154	IWA7453	145.4
	155	1A	155	IWB8643	150.2
	156	1A	156	IWA3799	152.6
	157	1A	157	IWA5734	153.8
	158	1A	158	IWA6916	156.1
	159	1A	159	IWB36094	156.5
	160	1A	160	IWB59296	158.1
	161	1A	161	IWB31956	159.7
	162	1A	162	IWB45184	160.5
	163	1A	163	IWB58726	160.6
	164	1A	164	IWB34513	160.8
	165	1A	165	IWB10518	160.9
	166	1B	1	IWB74615	0
	167	1B	2	IWB73112	0.9
	168	1B	3	IWB29450	1
	169	1B	4	IWB4711	1.1
	170	1B	5	IWB53299	2.3
	171	1B	6	IWB60716	2.6
	172	1B	7	IWB47979	3.3
	173	1B	8	IWB47800	3.6
	174	1B	9	IWB3983	3.9
	175	1B	10	IWB23597	4.6
	176	1B	11	IWB8866	6.1
	177	1B	12	IWB11788	8.8
	178	1B	13	IWB11640	9.4
	179	1B	14	IWB64096	12.8
	180	1B	15	IWB74219	13
	181	1B	16	IWB9761	13.7
	182	1B	17	IWB61101	14
	183	1B	18	IWB34802	14.1
	184	1B	19	IWB13224	15.2
	185	1B	20	IWB7368	15.6
	186	1B	21	IWB68307	16.4
	187	1B	22	IWB49196	16.7
	188	1B	23	IWB70626	17.5
	189	1B	24	IWB21983	17.8
	190	1B	25	IWB47908	18.2
	191	1B	26	IWB47909	18.3
	192	1B	27	IWB72084	18.5
	193	1B	28	IWB68801	26.7
	194	1B	29	IWA1947	26.8
	195	1B	30	IWA4504	26.9
	196	1B	31	IWA6450	27
	197	1B	32	IWB27167	27.1
	198	1B	33	IWB67163	28.3
	199	1B	34	IWA7703	29
	200	1B	35	IWA8557	29.4
	201	1B	36	IWB42309	32.6
	202	1B	37	IWB74029	35.6
	203	1B	38	IWB26466	36.1
	204	1B	39	IWB58765	36.8
	205	1B	40	IWB53833	37.4
	206	1B	41	IWB59981	38.7
	207	1B	42	IWA1883	39.6
	208	1B	43	IWB57679	39.7
	209	1B	44	IWB8464	40.3
	210	1B	45	IWB72782	40.9
	211	1B	46	IWB44363	41
	212	1B	47	IWB8685	42.1
	213	1B	48	IWB7167	43.4
	214	1B	49	IWB9435	44.2
	215	1B	50	IWB7589	45.1
	216	1B	51	IWB34743	45.2
	217	1B	52	IWB33204	45.8
	218	1B	53	IWB45383	46
	219	1B	54	IWB68665	47.3
	220	1B	55	IWB6522	47.5
	221	1B	56	IWB31997	50.9
	222	1B	57	IWB65416	52.7
	223	1B	58	IWB10453	52.8
	224	1B	59	IWA1566	53.7
	225	1B	60	IWB8572	54.3
	226	1B	61	IWB38801	54.4
	227	1B	62	IWB34533	54.5
	228	1B	63	IWB62561	54.6
	229	1B	64	IWB11851	54.8
	230	1B	65	IWB47894	55.9
	231	1B	66	IWB53142	56.1
	232	1B	67	IWA8199	57.4
	233	1B	68	IWB13028	57.7
	234	1B	69	IWB31649	58.6
	235	1B	70	IWB35366	58.7
	236	1B	71	IWB7703	59.2
	237	1B	72	IWB11250	59.6
	238	1B	73	IWB48995	61.6
	239	1B	74	IWB27669	61.9
	240	1B	75	IWB47778	62
	241	1B	76	IWB61947	62.1
	242	1B	77	IWA1841	62.2
	243	1B	78	IWB52958	64.7
	244	1B	79	IWB24606	65.4
	245	1B	80	IWB58050	66
	246	1B	81	IWB55253	67.1
	247	1B	82	IWB19967	67.6
	248	1B	83	IWB12735	68.2
	249	1B	84	IWA7234	68.8
	250	1B	85	IWB51306	69
	251	1B	86	IWB8913	69.3
	252	1B	87	IWB49345	69.4
	253	1B	88	IWB24798	70.3
	254	1B	89	IWB65943	70.4
	255	1B	90	IWB73480	70.5
	256	1B	91	IWB11881	71.7
	257	1B	92	IWB46989	72.7
	258	1B	93	IWB4355	72.8
	259	1B	94	IWB31677	73.1
	260	1B	95	IWB44741	73.2
	261	1B	96	IWB14360	73.3
	262	1B	97	IWB51448	73.4
	263	1B	98	IWB11662	73.5
	264	1B	99	IWB34608	74.8
	265	1B	100	IWB55154	75.8
	266	1B	101	IWB40931	76.8
	267	1B	102	IWB1569	76.8
	268	1B	103	IWB60858	77.4
	269	1B	104	IWB20264	77.5
	270	1B	105	IWA7280	77.9
	271	1B	106	IWA6703	78
	272	1B	107	IWB34685	78.2
	273	1B	108	IWB74353	78.3
	274	1B	109	IWB55062	78.4
	275	1B	110	IWB40316	78.5
	276	1B	111	IWA6062	78.7
	277	1B	112	IWB48992	78.8
	278	1B	113	IWB55658	78.9
	279	1B	114	IWB8379	79
	280	1B	115	IWA7934	79.1
	281	1B	116	IWA15	79.2
	282	1B	117	IWB46114	80.2
	283	1B	118	IWB71039	80.4
	284	1B	119	IWB45937	89.2
	285	1B	120	IWB46165	89.6
	286	1B	121	IWA7772	89.7
	287	1B	122	IWA8082	89.9
	288	1B	123	IWB65324	90.1
	289	1B	124	IWB31964	91.4
	290	1B	125	IWB9703	91.8
	291	1B	126	IWA6684	92
	292	1B	127	IWA3502	93
	293	1B	128	IWB7462	93.1
	294	1B	129	IWB51782	93.7
	295	1B	130	IWA5561	94.2
	296	1B	131	IWB2223	94.5
	297	1B	132	IWA6917	95.7
	298	1B	133	IWB8182	96.1
	299	1B	134	IWB24969	96.2
	300	1B	135	IWB72647	97.1
	301	1B	136	IWB11607	98.4
	302	1B	137	IWB72646	98.6
	303	1B	138	IWB2633	99.1
	304	1B	139	IWB38741	99.4
	305	1B	140	IWB1024	99.5
	306	1B	141	IWB12819	99.8
	307	1B	142	IWA460	100.2
	308	1B	143	IWB42604	100.6
	309	1B	144	IWA4361	103.4
	310	1B	145	IWB10372	103.7
	311	1B	146	IWB31681	103.8
	312	1B	147	IWA4089	103.9
	313	1B	148	IWA6731	104.2
	314	1B	149	IWB25041	104.5
	315	1B	150	IWB55418	104.6
	316	1B	151	IWA540	104.7
	317	1B	152	IWB13176	104.8
	318	1B	153	IWB6504	106.3
	319	1B	154	IWB31943	106.6
	320	1B	155	IWB22186	108.2
	321	1B	156	IWB57213	109.8
	322	1B	157	IWB58168	110.3
	323	1B	158	IWB59152	110.4
	324	1B	159	IWB8944	111.9
	325	1B	160	IWB70037	112.2
	326	1B	161	IWB72730	112.8
	327	1B	162	IWA5160	112.9
	328	1B	163	IWB10104	113.3
	329	1B	164	IWB44558	113.4
	330	1B	165	IWA7811	114.3
	331	1B	166	IWB28955	114.4
	332	1B	167	IWB7179	116.6
	333	1B	168	IWB42110	117.5
	334	1B	169	IWB46336	117.6
	335	1B	170	IWA5383	118.3
	336	1B	171	IWA3216	120.4
	337	1B	172	IWB30247	120.4
	338	1B	173	IWB30242	121.7
	339	1B	174	IWA8313	122.5
	340	1B	175	IWB25615	122.6
	341	1B	176	IWA579	123.9
	342	1B	177	IWB22505	124.3
	343	1B	178	IWB44036	125.2
	344	1B	179	IWB29956	125.3
	345	1B	180	IWB48950	126.2
	346	1B	181	IWB9764	128.1
	347	1B	182	IWA3341	128.6
	348	1B	183	IWB35712	132.9
	349	1B	184	IWA8246	133.6
	350	1B	185	IWB71992	133.8
	351	1B	186	IWB73033	133.9
	352	1B	187	IWB6989	134
	353	1B	188	IWB35958	134.8
	354	1B	189	IWA7422	147.9
	355	1B	190	IWB20313	148.7
	356	1B	191	IWB5810	149.4
	357	1B	192	IWB10454	150.5
	358	1B	193	IWB46250	151.3
	359	1B	194	IWB12979	151.6
	360	1B	195	IWB65867	151.7
	361	1B	196	IWB22334	152.1
	362	1B	197	IWB42466	152.2
	363	1B	198	IWB66192	152.4
	364	1B	199	IWB43818	152.7
	365	1B	200	IWB29144	153.7
	366	1B	201	IWB57106	159
	367	1B	202	IWB5855	159.1
	368	1B	203	IWB456	160.1
	369	1B	204	IWB9493	160.2
	370	1B	205	IWB25833	161.3
	371	1B	206	IWB47064	161.5
	372	1B	207	IWB41896	162.7
	373	1B	208	IWB53690	162.8
	374	1B	209	IWB34585	163.1
	375	1B	210	IWB1371	164.8
	376	1B	211	IWA3097	165.1
	377	1B	212	IWB70079	166.9
	378	1B	213	IWB7686	171.7
	379	1B	214	IWA1092	172.1
	380	1B	215	IWB31741	174.1
	381	1B	216	IWB31739	174.8
	382	1B	217	IWA919	179
	383	1B	218	IWB57628	181
	384	1B	219	IWB4454	182.2
	385	1B	220	IWB71943	183.2
	386	1B	221	IWA3892	184
	387	1B	222	IWB57627	185.1
	388	1B	223	IWB31676	185.2
	389	1B	224	IWB73765	194.4
	390	1B	225	IWA6511	194.6
	391	1B	226	IWB62079	194.9
	392	1B	227	IWB48380	196.2
	393	1B	228	IWB29845	196.3
	394	1B	229	IWB5783	196.4
	395	1B	230	IWB45606	198.1
	396	1B	231	IWB31957	199.6
	397	1B	232	IWB35151	200.7
	398	1B	233	IWA1355	202.3
	399	1B	234	IWB9040	203.1
	400	1B	235	IWB72243	203.5
	401	1B	236	IWB8817	204
	402	1B	237	IWB5732	207.9
	403	1D	1	IWB3277	0
	404	1D	2	IWB12224	0.8
	405	1D	3	IWB211	12.1
	406	1D	4	IWA7797	14.9
	407	1D	5	IWB65070	17.8
	408	1D	6	IWA713	17.9
	409	1D	7	IWB63609	18
	410	1D	8	IWB14612	19.2
	411	1D	9	IWB38353	19.3
	412	1D	10	IWB60473	19.6
	413	1D	11	IWB17662	20
	414	1D	12	IWB15887	25.2
	415	1D	13	IWB55944	26.2
	416	1D	14	IWB15693	26.3
	417	1D	15	IWB19917	30.4
	418	1D	16	IWB35981	33
	419	1D	17	IWB46138	33.3
	420	1D	18	IWB11308	33.6
	421	1D	19	IWB42384	33.7
	422	1D	20	IWB7075	37.8
	423	1D	21	IWB23596	41.6
	424	1D	22	IWB65387	46.3
	425	1D	23	IWB7344	49.4
	426	1D	24	IWB36321	60
	427	1D	25	IWB23980	66.6
	428	1D	26	IWA7702	67.8
	429	1D	27	IWA3548	67.9
	430	1D	28	IWA7023	68.6
	431	1D	29	IWB49445	69.7
	432	1D	30	IWA5514	70.1
	433	1D	31	IWB64617	71.1
	434	1D	32	IWB20006	71.2
	435	1D	33	IWB56444	84.3
	436	1D	34	IWB6677	84.4
	437	1D	35	IWB18967	94.9
	438	1D	36	IWB65293	109.9
	439	1D	37	IWB55371	110
	440	1D	38	IWB73713	110.1
	441	1D	39	IWB62453	111.7
	442	2A	1	IWB59316	0
	443	2A	2	IWB22183	1.2
	444	2A	3	IWA3468	1.3
	445	2A	4	IWB65498	1.4
	446	2A	5	IWB74467	1.9
	447	2A	6	IWB28816	2.7
	448	2A	7	IWA1562	2.8
	449	2A	8	IWB41956	3.7
	450	2A	9	IWB12641	4.6
	451	2A	10	IWB51189	5
	452	2A	11	IWA3556	6.5
	453	2A	12	IWA5342	7
	454	2A	13	IWA4989	7.7
	455	2A	14	IWA7736	8.5
	456	2A	15	IWB23764	9.5
	457	2A	16	IWB20037	12.1
	458	2A	17	IWB23392	17.1
	459	2A	18	IWB47954	18.9
	460	2A	19	IWB11847	23.3
	461	2A	20	IWB6727	23.6
	462	2A	21	IWB21441	31.4
	463	2A	22	IWB11050	32.1
	464	2A	23	IWB11051	33.6
	465	2A	24	IWA1152	34.8
	466	2A	25	IWB70473	36.8
	467	2A	26	IWB42945	38.3
	468	2A	27	IWB29812	38.7
	469	2A	28	IWB38844	40
	470	2A	29	IWB9499	40.3
	471	2A	30	IWA4213	44.6
	472	2A	31	IWB41735	44.9
	473	2A	32	IWB17323	46.9
	474	2A	33	IWB46463	47
	475	2A	34	IWB24281	49.3
	476	2A	35	IWA4385	50.6
	477	2A	36	IWA6250	52.3
	478	2A	37	IWB51951	56.4
	479	2A	38	IWB10489	57
	480	2A	39	IWB63170	58
	481	2A	40	IWA5893	59.3
	482	2A	41	IWB1573	61.1
	483	2A	42	IWB71880	62.2
	484	2A	43	IWB53660	62.5
	485	2A	44	IWA5824	63
	486	2A	45	IWB50153	63.1
	487	2A	46	IWB55668	63.6
	488	2A	47	IWB62779	64
	489	2A	48	IWB22047	65
	490	2A	49	IWA4027	65.1
	491	2A	50	IWA3570	65.2
	492	2A	51	IWB9395	66.3
	493	2A	52	IWB43628	66.7
	494	2A	53	IWA2531	67.8
	495	2A	54	IWB49427	68.1
	496	2A	55	IWB72860	68.5
	497	2A	56	IWB2796	68.6
	498	2A	57	IWA5037	68.9
	499	2A	58	IWB49279	70.1
	500	2A	59	IWB41384	70.4
	501	2A	60	IWA7705	71.6
	502	2A	61	IWB54345	72.7
	503	2A	62	IWB3724	73.6
	504	2A	63	IWB63921	74.3
	505	2A	64	IWB28985	74.4
	506	2A	65	IWB39195	75.6
	507	2A	66	IWA5378	75.9
	508	2A	67	IWA2758	76.3
	509	2A	68	IWB14710	76.9
	510	2A	69	IWB46270	77.3
	511	2A	70	IWA5569	77.4
	512	2A	71	IWB63018	77.5
	513	2A	72	IWB14852	78.7
	514	2A	73	IWB56330	79.6
	515	2A	74	IWB69353	79.7
	516	2A	75	IWB65566	79.8
	517	2A	76	IWB11319	81.1
	518	2A	77	IWA5550	81.3
	519	2A	78	IWA2831	81.4
	520	2A	79	IWB7658	81.5
	521	2A	80	IWB32273	82.3
	522	2A	81	IWB7666	83
	523	2A	82	IWB68110	84.6
	524	2A	83	IWB7015	86.3
	525	2A	84	IWB7315	88
	526	2A	85	IWB51885	89
	527	2A	86	IWB47745	93.4
	528	2A	87	IWB6986	95.4
	529	2A	88	IWB20877	98.1
	530	2A	89	IWB65467	98.8
	531	2A	90	IWB32066	99.1
	532	2A	91	IWB71648	100.3
	533	2A	92	IWB51638	108.7
	534	2A	93	IWB12332	111.3
	535	2A	94	IWA5878	111.4
	536	2A	95	IWB28641	111.9
	537	2A	96	IWA2835	112.3
	538	2A	97	IWB26847	112.4
	539	2A	98	IWB2985	112.5
	540	2A	99	IWA2884	112.6
	541	2A	100	IWB4479	113
	542	2A	101	IWB59335	113.7
	543	2A	102	IWB19207	114.5
	544	2A	103	IWB9653	115.9
	545	2A	104	IWB45747	116.7
	546	2A	105	IWA970	116.9
	547	2A	106	IWB39211	117.2
	548	2A	107	IWB11090	121.5
	549	2A	108	IWB61745	123.3
	550	2A	109	IWB13862	123.8
	551	2A	110	IWA8385	124.9
	552	2A	111	IWB8707	125.3
	553	2A	112	IWB43208	127.1
	554	2A	113	IWA5066	129
	555	2A	114	IWA2938	129.1
	556	2A	115	IWA8041	132.5
	557	2A	116	IWB10957	133
	558	2A	117	IWB835	133.1
	559	2A	118	IWA4336	133.5
	560	2A	119	IWB55858	133.6
	561	2A	120	IWB70188	133.9
	562	2A	121	IWB73568	135.6
	563	2A	122	IWB28621	138.9
	564	2A	123	IWB36400	139.5
	565	2A	124	IWB65881	139.7
	566	2A	125	IWB71251	139.9
	567	2A	126	IWB58213	140.5
	568	2A	127	IWB54504	141.4
	569	2A	128	IWB21523	141.8
	570	2A	129	IWB45464	141.9
	571	2A	130	IWB35954	142.6
	572	2A	131	IWB73086	143.8
	573	2A	132	IWB36825	144.5
	574	2A	133	IWB9045	144.9
	575	2A	134	IWB71816	145
	576	2A	135	IWB54406	146
	577	2A	136	IWB72840	146.3
	578	2A	137	IWA8036	146.4
	579	2A	138	IWB55230	146.8
	580	2A	139	IWB69132	146.9
	581	2A	140	IWB39958	147.5
	582	2A	141	IWB61340	148.1
	583	2A	142	IWB10540	148.2
	584	2A	143	IWA7671	149.7
	585	2A	144	IWB73638	149.8
	586	2A	145	IWB29506	153.8
	587	2A	146	IWB9546	160.1
	588	2A	147	IWA5894	160.4
	589	2A	148	IWB75252	164.9
	590	2A	149	IWB58696	165.7
	591	2A	150	IWA7335	166.4
	592	2A	151	IWB25134	166.5
	593	2A	152	IWB60198	167.5
	594	2A	153	IWA8533	167.7
	595	2A	154	IWB26855	168
	596	2A	155	IWB46026	168.4
	597	2A	156	IWB64156	169.7
	598	2A	157	IWB13528	170.2
	599	2A	158	IWB10614	171.5
	600	2B	1	IWB65469	0
	601	2B	2	IWB16527	1.9
	602	2B	3	IWB59781	9.9
	603	2B	4	IWB54981	10.4
	604	2B	5	IWB54980	12.2
	605	2B	6	IWB67044	12.7
	606	2B	7	IWB21110	12.8
	607	2B	8	IWB70908	14.8
	608	2B	9	IWA2441	16.8
	609	2B	10	IWB57312	16.9
	610	2B	11	IWB70914	17.2
	611	2B	12	IWA1931	18.1
	612	2B	13	IWA5737	18.2
	613	2B	14	IWA2117	18.8
	614	2B	15	IWA2116	18.9
	615	2B	16	IWB55434	19.5
	616	2B	17	IWB313	24
	617	2B	18	IWB70375	24.7
	618	2B	19	IWB55936	25.4
	619	2B	20	IWB3606	25.5
	620	2B	21	IWB49277	28.2
	621	2B	22	IWB39654	28.5
	622	2B	23	IWB61862	30.1
	623	2B	24	IWB40468	31.7
	624	2B	25	IWB10022	32.2
	625	2B	26	IWB57346	32.6
	626	2B	27	IWB7346	33.1
	627	2B	28	IWB69461	33.8
	628	2B	29	IWB58259	36.1
	629	2B	30	IWB35359	36.9
	630	2B	31	IWB28586	37
	631	2B	32	IWB7072	37.6
	632	2B	33	IWB65391	37.9
	633	2B	34	IWB57730	38.9
	634	2B	35	IWB3877	39.2
	635	2B	36	IWB60422	40.4
	636	2B	37	IWB68550	40.5
	637	2B	38	IWA6364	41.8
	638	2B	39	IWA3081	43
	639	2B	40	IWB7348	43.3
	640	2B	41	IWA4720	44.1
	641	2B	42	IWB46839	44.2
	642	2B	43	IWA897	44.5
	643	2B	44	IWB53910	45.7
	644	2B	45	IWA5147	47
	645	2B	46	IWB47487	47.9
	646	2B	47	IWA6177	48.7
	647	2B	48	IWA6554	49.7
	648	2B	49	IWB7833	49.8
	649	2B	50	IWB56731	49.9
	650	2B	51	IWA7263	50.3
	651	2B	52	IWB35009	50.6
	652	2B	53	IWB44288	50.7
	653	2B	54	IWA8344	50.8
	654	2B	55	IWA3621	51.4
	655	2B	56	IWB69228	52.1
	656	2B	57	IWB57806	52.8
	657	2B	58	IWB59202	53.8
	658	2B	59	IWB67365	54.5
	659	2B	60	IWA6875	54.9
	660	2B	61	IWB51607	55.6
	661	2B	62	IWA6135	55.8
	662	2B	63	IWB13596	57.8
	663	2B	64	IWB30276	58.5
	664	2B	65	IWB62812	59.4
	665	2B	66	IWA7821	60.7
	666	2B	67	IWA4100	61
	667	2B	68	IWB13007	61.4
	668	2B	69	IWB4009	62.1
	669	2B	70	IWB59321	62.7
	670	2B	71	IWB45905	62.8
	671	2B	72	IWB61792	63.4
	672	2B	73	IWB47784	63.5
	673	2B	74	IWA8454	63.6
	674	2B	75	IWA6966	63.7
	675	2B	76	IWB64813	63.8
	676	2B	77	IWB63805	64.5
	677	2B	78	IWB71212	65.1
	678	2B	79	IWA5128	65.7
	679	2B	80	IWA5117	67.2
	680	2B	81	IWB75295	67.3
	681	2B	82	IWB57577	68.3
	682	2B	83	IWB46657	68.7
	683	2B	84	IWB36339	71.7
	684	2B	85	IWB9324	74.3
	685	2B	86	IWB68043	82.5
	686	2B	87	IWB69271	82.5
	687	2B	88	IWB64778	83.1
	688	2B	89	IWB36836	84.8
	689	2B	90	IWB64817	84.9
	690	2B	91	IWB35013	85
	691	2B	92	IWB4713	85.1
	692	2B	93	IWB61082	85.7
	693	2B	94	IWA2189	85.8
	694	2B	95	IWA1305	85.9
	695	2B	96	IWA6453	86.2
	696	2B	97	IWB23236	86.5
	697	2B	98	IWB58039	87.2
	698	2B	99	IWB21922	88.5
	699	2B	100	IWB32351	89.6
	700	2B	101	IWB50645	90.8
	701	2B	102	IWB35602	91.5
	702	2B	103	IWB39785	91.9
	703	2B	104	IWA4358	96
	704	2B	105	IWB54116	96.1
	705	2B	106	IWB2373	98.8
	706	2B	107	IWB60658	99.2
	707	2B	108	IWB23831	100
	708	2B	109	IWB68759	100.2
	709	2B	110	IWA7850	100.5
	710	2B	111	IWA4357	100.6
	711	2B	112	IWA5064	100.9
	712	2B	113	IWA3935	101
	713	2B	114	IWB63291	101.3
	714	2B	115	IWB12242	101.7
	715	2B	116	IWB8480	101.8
	716	2B	117	IWB20255	102.4
	717	2B	118	IWB32348	102.5
	718	2B	119	IWB62876	103.1
	719	2B	120	IWB8479	104
	720	2B	121	IWB12045	105
	721	2B	122	IWB65547	105.4
	722	2B	123	IWB65910	106
	723	2B	124	IWB102	107.5
	724	2B	125	IWB28799	107.8
	725	2B	126	IWB66367	111.1
	726	2B	127	IWA7539	111.3
	727	2B	128	IWB11178	112.4
	728	2B	129	IWB15068	113.7
	729	2B	130	IWB73961	115.8
	730	2B	131	IWB60406	116.9
	731	2B	132	IWB40156	117
	732	2B	133	IWB34719	117.3
	733	2B	134	IWB8419	117.7
	734	2B	135	IWB35017	117.9
	735	2B	136	IWA3148	118
	736	2B	137	IWB28002	120.4
	737	2B	138	IWB14614	122
	738	2B	139	IWB9581	124.8
	739	2B	140	IWB27841	124.9
	740	2B	141	IWB36765	125
	741	2B	142	IWB42959	127.8
	742	2B	143	IWB9317	129
	743	2B	144	IWB57370	130.4
	744	2B	145	IWB47343	131.7
	745	2B	146	IWB3380	132
	746	2B	147	IWB4865	132.3
	747	2B	148	IWB42392	132.9
	748	2B	149	IWB9162	133.3
	749	2B	150	IWB7514	133.4
	750	2B	151	IWB11174	134
	751	2B	152	IWB10441	134.1
	752	2B	153	IWA3478	134.7
	753	2B	154	IWB7766	135
	754	2B	155	IWB45063	135.3
	755	2B	156	IWB8338	135.5
	756	2B	157	IWB28578	138.4
	757	2B	158	IWA3714	138.5
	758	2B	159	IWA5460	141
	759	2B	160	IWB74	141.3
	760	2B	161	IWB74698	141.4
	761	2B	162	IWA638	141.6
	762	2B	163	IWB67729	141.7
	763	2B	164	IWB48440	150.1
	764	2B	165	IWB32262	150.8
	765	2B	166	IWB54701	150.9
	766	2B	167	IWB6975	153.6
	767	2B	168	IWB70132	155.3
	768	2B	169	IWB40514	156.1
	769	2B	170	IWB62356	157.4
	770	2B	171	IWB30421	158
	771	2B	172	IWB71	158.1
	772	2B	173	IWB64039	158.9
	773	2B	174	IWB61115	159.2
	774	2B	175	IWB72571	159.3
	775	2B	176	IWA3474	163.3
	776	2B	177	IWB72278	164.3
	777	2B	178	IWB32211	165.7
	778	2B	179	IWB31257	174.2
	779	2B	180	IWB68948	176.1
	780	2B	181	IWB22135	176.5
	781	2B	182	IWB65019	177
	782	2B	183	IWB35482	177.4
	783	2B	184	IWB63563	177.5
	784	2B	185	IWA2094	179.3
	785	2B	186	IWB8699	180.9
	786	2B	187	IWB32375	181.4
	787	2B	188	IWA8018	182.4
	788	2B	189	IWB36702	182.6
	789	2B	190	IWB29266	182.9
	790	2B	191	IWB32334	184.5
	791	2B	192	IWB48388	188.5
	792	2B	193	IWB11457	195.5
	793	2B	194	IWB74556	197.3
	794	2B	195	IWB7757	197.4
	795	2B	196	IWB33089	198.7
	796	2D1	1	IWB29454	0
	797	2D1	2	IWB61001	1.8
	798	2D1	3	IWB7792	2
	799	2D1	4	IWB25308	4.7
	800	2D1	5	IWB61002	5
	801	2D1	6	IWB18619	5.7
	802	2D1	7	IWB8481	7.4
	803	2D1	8	IWB69831	7.5
	804	2D1	9	IWB62039	8.3
	805	2D1	10	IWA4746	8.7
	806	2D1	11	IWB8864	9.6
	807	2D1	12	IWB65062	9.8
	808	2D1	13	IWB25303	10.2
	809	2D1	14	IWB8545	11.2
	810	2D1	15	IWB6156	11.6
	811	2D1	16	IWB44405	11.6
	812	2D1	17	IWB75156	17
	813	2D1	18	IWB15580	17.4
	814	2D1	19	IWB19149	18.7
	815	2D1	20	IWB37711	18.9
	816	2D1	21	IWB11668	20.6
	817	2D1	22	IWB74411	27.3
	818	2D1	23	IWB7001	28.3
	819	2D1	24	IWA760	34.7
	820	2D1	25	IWA927	35.2
	821	2D1	26	IWA7418	55.8
	822	2D1	27	IWA4496	56.1
	823	2D1	28	IWB51389	56.8
	824	2D1	29	IWB49647	57.1
	825	2D1	30	IWB9114	60.5
	826	2D1	31	IWB9163	61.8
	827	2D1	32	IWB57446	62.8
	828	2D1	33	IWB65385	62.9
	829	2D1	34	IWB24610	63.1
	830	2D1	35	IWB65168	64.4
	831	2D1	36	IWB6770	64.5
	832	2D1	37	IWB35389	64.6
	833	2D1	38	IWB26157	64.7
	834	2D1	39	IWB62940	64.8
	835	2D1	40	IWB6795	66
	836	2D1	41	IWB6185	66.8
	837	2D1	42	IWB46874	68
	838	2D1	43	IWB15166	68.4
	839	2D1	44	IWB56002	68.6
	840	2D1	45	IWB50203	68.6
	841	2D1	46	IWB41295	74.7
	842	2D1	47	IWA8151	75
	843	2D1	48	IWB37985	75.1
	844	2D1	49	IWB18357	79
	845	2D1	50	IWB5774	80.5
	846	2D1	51	IWB7652	81
	847	2D1	52	IWB38306	81.4
	848	2D1	53	IWB24133	91.6
	849	2D1	54	IWB62960	91.8
	850	2D1	55	IWB27617	97.5
	851	2D1	56	IWA1072	97.6
	852	2D1	57	IWB21600	107.4
	853	2D2	1	IWB62525	0
	854	2D2	2	IWB53992	0.1
	855	2D2	3	IWB3458	0.8
	856	2D2	4	IWB56014	0.9
	857	2D2	5	IWB41399	2.5
	858	2D2	6	IWB74084	3.3
	859	2D2	7	IWB60517	3.7
	860	2D2	8	IWB23938	3.8
	861	2D2	9	IWB47227	3.9
	862	2D2	10	IWB19369	4
	863	2D2	11	IWB43945	4.6
	864	2D2	12	IWB43183	4.7
	865	2D2	13	IWB15275	15.1
	866	2D2	14	IWB62022	15.3
	867	2D2	15	IWB62020	16
	868	2D2	16	IWB53617	16.1
	869	2D2	17	IWB62662	16.6
	870	2D2	18	IWB25146	29.5
	871	2D2	19	IWB56662	31
	872	2D2	20	IWB15873	31.8
	873	2D2	21	IWB73791	34.8
	874	2D2	22	IWB74096	37.1
	875	2D2	23	IWB64223	37.7
	876	2D2	24	IWB35404	43.3
	877	2D2	25	IWB10564	44.1
	878	2D2	26	IWB700	44.9
	879	2D2	27	IWB63907	45
	880	3A	1	IWA447	0
	881	3A	2	IWB65779	0.3
	882	3A	3	IWB23458	0.4
	883	3A	4	IWA3102	1.5
	884	3A	5	IWA6977	1.7
	885	3A	6	IWA1702	3.9
	886	3A	7	IWB28492	4.1
	887	3A	8	IWB7659	4.2
	888	3A	9	IWA3894	5.3
	889	3A	10	IWB50521	5.8
	890	3A	11	IWB401	6.9
	891	3A	12	IWB8658	7
	892	3A	13	IWB63999	8.1
	893	3A	14	IWB52332	10.1
	894	3A	15	IWA8127	10.2
	895	3A	16	IWB24188	10.9
	896	3A	17	IWB65471	11
	897	3A	18	IWB72256	11.2
	898	3A	19	IWA8106	12.1
	899	3A	20	IWB8523	17.9
	900	3A	21	IWA4257	18.2
	901	3A	22	IWB63761	18.3
	902	3A	23	IWB32114	27.7
	903	3A	24	IWB43842	29.4
	904	3A	25	IWB7571	29.8
	905	3A	26	IWB8516	30.6
	906	3A	27	IWB58395	31
	907	3A	28	IWB65976	47
	908	3A	29	IWA5151	47.6
	909	3A	30	IWB32770	48.5
	910	3A	31	IWB10633	48.6
	911	3A	32	IWB71974	48.7
	912	3A	33	IWB60171	49.6
	913	3A	34	IWB60170	50.5
	914	3A	35	IWA7064	51.3
	915	3A	36	IWA2519	52.2
	916	3A	37	IWB29267	53
	917	3A	38	IWA6306	53.3
	918	3A	39	IWA720	53.7
	919	3A	40	IWB45706	54.1
	920	3A	41	IWB68344	55.4
	921	3A	42	IWB63637	56.1
	922	3A	43	IWA637	57.4
	923	3A	44	IWA4913	57.6
	924	3A	45	IWB8878	58.5
	925	3A	46	IWB58191	58.7
	926	3A	47	IWA463	58.8
	927	3A	48	IWB2045	59.7
	928	3A	49	IWB38468	60.1
	929	3A	50	IWB30062	60.2
	930	3A	51	IWB32630	60.4
	931	3A	52	IWB69709	61.5
	932	3A	53	IWA6187	61.8
	933	3A	54	IWB29140	62
	934	3A	55	IWB40273	62.7
	935	3A	56	IWB28607	63
	936	3A	57	IWB47447	63.3
	937	3A	58	IWB52224	65.2
	938	3A	59	IWB35578	66.5
	939	3A	60	IWB35562	67.5
	940	3A	61	IWB12525	67.6
	941	3A	62	IWB26728	67.7
	942	3A	63	IWB38659	69.8
	943	3A	64	IWA6783	70.5
	944	3A	65	IWA7319	70.7
	945	3A	66	IWB24803	72.5
	946	3A	67	IWB2704	72.9
	947	3A	68	IWB9012	73.5
	948	3A	69	IWB52564	73.8
	949	3A	70	IWB72139	73.9
	950	3A	71	IWB54481	75.2
	951	3A	72	IWB25569	82.8
	952	3A	73	IWB67653	86.3
	953	3A	74	IWA4053	88.2
	954	3A	75	IWB8499	89.5
	955	3A	76	IWA3544	91.7
	956	3A	77	IWB43455	92.4
	957	3A	78	IWA7087	93.3
	958	3A	79	IWB36101	95
	959	3A	80	IWA4298	95.2
	960	3A	81	IWA7696	95.8
	961	3A	82	IWB53975	97.4
	962	3A	83	IWB8144	97.4
	963	3A	84	IWB9039	97.6
	964	3A	85	IWB27192	99.2
	965	3A	86	IWB71663	102
	966	3A	87	IWB73056	103.6
	967	3A	88	IWB73699	103.7
	968	3A	89	IWB65658	104
	969	3A	90	IWB48686	106.6
	970	3A	91	IWB7866	107.2
	971	3A	92	IWA3111	108.9
	972	3A	93	IWA616	109.1
	973	3A	94	IWB30806	110.8
	974	3A	95	IWA2029	111.4
	975	3A	96	IWA2008	111.8
	976	3A	97	IWB34330	124.3
	977	3A	98	IWB7543	125
	978	3A	99	IWB30466	126.5
	979	3A	100	IWB24136	127.5
	980	3A	101	IWB29012	133.5
	981	3A	102	IWB68475	134.5
	982	3A	103	IWB48733	142.8
	983	3A	104	IWB32679	151.7
	984	3A	105	IWB58806	153.1
	985	3A	106	IWA1207	154.1
	986	3A	107	IWB41929	155
	987	3A	108	IWA4905	155.7
	988	3A	109	IWB74609	155.8
	989	3A	110	IWB366	159.5
	990	3A	111	IWB7383	160.2
	991	3A	112	IWB13994	161.2
	992	3A	113	IWB32649	161.5
	993	3A	114	IWB61868	165
	994	3A	115	IWB8784	166.4
	995	3A	116	IWB66063	166.7
	996	3A	117	IWB59204	168
	997	3A	118	IWB29936	168.8
	998	3A	119	IWA8185	169.8
	999	3A	120	IWB72092	174.3
	1000	3A	121	IWB67819	175.4
	1001	3A	122	IWA5190	175.8
	1002	3A	123	IWB70610	176.8
	1003	3A	124	IWB68722	176.9
	1004	3A	125	IWA5191	177
	1005	3A	126	IWB38307	177.1
	1006	3A	127	IWB22997	181.6
	1007	3A	128	IWB72216	181.9
	1008	3A	129	IWB30714	183.1
	1009	3A	130	IWB61491	183.5
	1010	3A	131	IWA7158	184.4
	1011	3A	132	IWA602	184.6
	1012	3A	133	IWB69564	185
	1013	3A	134	IWA8038	185.3
	1014	3B	1	IWB73356	0
	1015	3B	2	IWB31968	0.1
	1016	3B	3	IWB74350	1.4
	1017	3B	4	IWB31196	2.1
	1018	3B	5	IWB12026	2.2
	1019	3B	6	IWB47166	2.3
	1020	3B	7	IWB47165	3
	1021	3B	8	IWB63986	3.3
	1022	3B	9	IWB20761	4.6
	1023	3B	10	IWB66969	4.9
	1024	3B	11	IWB62488	5.2
	1025	3B	12	IWB64711	5.3
	1026	3B	13	IWB53982	6.3
	1027	3B	14	IWB58565	6.4
	1028	3B	15	IWA2908	9.4
	1029	3B	16	IWB65092	9.7
	1030	3B	17	IWB59448	9.8
	1031	3B	18	IWB36538	13
	1032	3B	19	IWA7971	15.4
	1033	3B	20	IWB37668	22
	1034	3B	21	IWB39782	23.4
	1035	3B	22	IWB25224	23.5
	1036	3B	23	IWB25086	27.1
	1037	3B	24	IWB59174	28.5
	1038	3B	25	IWB35069	29.3
	1039	3B	26	IWB1583	29.4
	1040	3B	27	IWB1757	29.8
	1041	3B	28	IWB4311	30.1
	1042	3B	29	IWB5240	30.2
	1043	3B	30	IWB32390	34.9
	1044	3B	31	IWB11760	36.6
	1045	3B	32	IWA3716	46.1
	1046	3B	33	IWB69124	46.2
	1047	3B	34	IWB59486	46.3
	1048	3B	35	IWA4575	46.6
	1049	3B	36	IWB21831	46.7
	1050	3B	37	IWB72222	46.8
	1051	3B	38	IWB5332	47.1
	1052	3B	39	IWB42474	47.2
	1053	3B	40	IWA6482	47.8
	1054	3B	41	IWB12551	48.6
	1055	3B	42	IWB12480	50.2
	1056	3B	43	IWB51862	50.9
	1057	3B	44	IWB8682	52
	1058	3B	45	IWB20076	52.4
	1059	3B	46	IWB63463	53.7
	1060	3B	47	IWB14946	54.4
	1061	3B	48	IWA6244	54.7
	1062	3B	49	IWB44006	54.8
	1063	3B	50	IWB47274	54.9
	1064	3B	51	IWB28844	55.2
	1065	3B	52	IWB47354	55.3
	1066	3B	53	IWB65877	56.4
	1067	3B	54	IWB56406	58.8
	1068	3B	55	IWB32504	59.4
	1069	3B	56	IWA729	60.8
	1070	3B	57	IWB27087	61
	1071	3B	58	IWA2494	61.7
	1072	3B	59	IWB38240	61.8
	1073	3B	60	IWA3001	62
	1074	3B	61	IWB61588	62
	1075	3B	62	IWB3505	63.1
	1076	3B	63	IWB24866	63.9
	1077	3B	64	IWB30529	65
	1078	3B	65	IWB8352	65.1
	1079	3B	66	IWB49991	65.2
	1080	3B	67	IWB21579	65.3
	1081	3B	68	IWB39029	65.6
	1082	3B	69	IWB30872	66.3
	1083	3B	70	IWB7963	67.1
	1084	3B	71	IWB54733	67.7
	1085	3B	72	IWB27759	71.1
	1086	3B	73	IWB34898	72.9
	1087	3B	74	IWB39505	73.3
	1088	3B	75	IWB6001	73.8
	1089	3B	76	IWB52079	73.9
	1090	3B	77	IWB73084	74
	1091	3B	78	IWB63113	77
	1092	3B	79	IWB52476	78.6
	1093	3B	80	IWA3244	80.6
	1094	3B	81	IWA1331	80.7
	1095	3B	82	IWA4457	80.9
	1096	3B	83	IWA8287	86.3
	1097	3B	84	IWA3274	86.5
	1098	3B	85	IWB29037	90.8
	1099	3B	86	IWA298	91.1
	1100	3B	87	IWB51094	92.1
	1101	3B	88	IWB47469	92.2
	1102	3B	89	IWB47171	92.3
	1103	3B	90	IWB8816	92.7
	1104	3B	91	IWA5016	92.8
	1105	3B	92	IWA2462	93.1
	1106	3B	93	IWB72806	96.6
	1107	3B	94	IWB72808	97.6
	1108	3B	95	IWB31458	102
	1109	3B	96	IWB55665	105.2
	1110	3B	97	IWB44447	107.4
	1111	3B	98	IWB40694	108.3
	1112	3B	99	IWA8043	109.6
	1113	3B	100	IWB48982	109.8
	1114	3B	101	IWB65493	110.5
	1115	3B	102	IWB28603	110.9
	1116	3B	103	IWB36630	112.2
	1117	3B	104	IWB6845	113.4
	1118	3B	105	IWA1094	114.2
	1119	3B	106	IWB10322	114.6
	1120	3B	107	IWB71646	114.7
	1121	3B	108	IWB20327	115.1
	1122	3B	109	IWB28628	116.8
	1123	3B	110	IWB63997	117.1
	1124	3B	111	IWB64802	117.2
	1125	3B	112	IWB12611	117.8
	1126	3B	113	IWB66054	118.4
	1127	3B	114	IWB34424	118.8
	1128	3B	115	IWA8058	118.9
	1129	3B	116	IWB9115	119.7
	1130	3B	117	IWB22843	122.9
	1131	3B	118	IWB9210	124.1
	1132	3B	119	IWB26915	139.8
	1133	3B	120	IWB11701	140.5
	1134	3B	121	IWB5211	141.6
	1135	3B	122	IWB4533	141.9
	1136	3B	123	IWB10310	143
	1137	3B	124	IWB72658	143.6
	1138	3B	125	IWB38792	144.8
	1139	3B	126	IWA6951	145.6
	1140	3B	127	IWB10689	146.8
	1141	3B	128	IWB7551	147.2
	1142	3D	1	IWB19105	0
	1143	3D	2	IWB41969	0.3
	1144	3D	3	IWB23518	2.7
	1145	3D	4	IWB14088	2.7
	1146	3D	5	IWB27554	11.6
	1147	3D	6	IWB13317	23.9
	1148	3D	7	IWB9996	26.1
	1149	3D	8	IWB30522	26.8
	1150	3D	9	IWB65745	30.9
	1151	3D	10	IWB52937	38.3
	1152	3D	11	IWB46364	40.1
	1153	3D	12	IWB8648	40.2
	1154	3D	13	IWB25194	41.8
	1155	3D	14	IWB12866	53.8
	1156	3D	15	IWA5030	60.5
	1157	3D	16	IWB5383	62.2
	1158	3D	17	IWB3915	62.6
	1159	3D	18	IWB32804	65.2
	1160	3D	19	IWA3929	66.8
	1161	3D	20	IWB4634	72.7
	1162	3D	21	IWB31166	73.3
	1163	3D	22	IWB34605	75.1
	1164	3D	23	IWB9674	85.8
	1165	3D	24	IWA4804	91.3
	1166	3D	25	IWB50520	96.2
	1167	3D	26	IWB23207	96.2
	1168	3D	27	IWB75016	96.2
	1169	3D	28	IWB62613	96.2
	1170	3D	29	IWB57185	96.2
	1171	3D	30	IWB56326	97.7
	1172	3D	31	IWB19097	97.8
	1173	3D	32	IWB56327	98.1
	1174	3D	33	IWB36829	100.7
	1175	4A	1	IWB19265	0
	1176	4A	2	IWB34577	0.9
	1177	4A	3	IWB51685	5.9
	1178	4A	4	IWB11749	14.6
	1179	4A	5	IWA108	16.5
	1180	4A	6	IWB57099	20.2
	1181	4A	7	IWB59410	21.6
	1182	4A	8	IWB47018	22.2
	1183	4A	9	IWB71863	25.9
	1184	4A	10	IWA4321	26.3
	1185	4A	11	IWB65817	27.5
	1186	4A	12	IWB58541	28.3
	1187	4A	13	IWB40915	29.2
	1188	4A	14	IWB1534	30.1
	1189	4A	15	IWB42814	31.7
	1190	4A	16	IWB32987	31.8
	1191	4A	17	IWB46371	32.6
	1192	4A	18	IWA4359	33.2
	1193	4A	19	IWB69834	34.1
	1194	4A	20	IWB14639	35.1
	1195	4A	21	IWB20983	35.7
	1196	4A	22	IWA3324	35.9
	1197	4A	23	IWB63118	36.3
	1198	4A	24	IWA6103	36.7
	1199	4A	25	IWA6046	37.3
	1200	4A	26	IWB53508	37.5
	1201	4A	27	IWA7657	37.6
	1202	4A	28	IWB25927	37.7
	1203	4A	29	IWA5652	39.1
	1204	4A	30	IWB55368	40.5
	1205	4A	31	IWB30780	40.8
	1206	4A	32	IWA1694	41.1
	1207	4A	33	IWB29422	41.4
	1208	4A	34	IWB62846	41.7
	1209	4A	35	IWA5123	46.4
	1210	4A	36	IWA4867	46.6
	1211	4A	37	IWB65411	47.1
	1212	4A	38	IWB74191	47.5
	1213	4A	39	IWB25105	47.9
	1214	4A	40	IWA7875	48.4
	1215	4A	41	IWA7107	48.5
	1216	4A	42	IWB57873	48.9
	1217	4A	43	IWB46934	49.3
	1218	4A	44	IWB13450	51.1
	1219	4A	45	IWA5699	52.6
	1220	4A	46	IWB6710	53
	1221	4A	47	IWB33128	54.3
	1222	4A	48	IWB56097	54.4
	1223	4A	49	IWB7495	54.8
	1224	4A	50	IWA482	55.6
	1225	4A	51	IWB57347	58.1
	1226	4A	52	IWB6533	59.1
	1227	4A	53	IWB34865	60.1
	1228	4A	54	IWB27435	64
	1229	4A	55	IWA6882	64.7
	1230	4A	56	IWB51795	66
	1231	4A	57	IWA6454	68
	1232	4A	58	IWB12302	69.9
	1233	4A	59	IWB6722	71.1
	1234	4A	60	IWB9799	71.6
	1235	4A	61	IWB11902	71.9
	1236	4A	62	IWB43721	73.9
	1237	4A	63	IWB40846	74.6
	1238	4A	64	IWB55175	74.8
	1239	4A	65	IWB7448	74.9
	1240	4A	66	IWB55747	78.8
	1241	4A	67	IWA6906	79.2
	1242	4A	68	IWB74052	81.8
	1243	4A	69	IWB24962	83.4
	1244	4A	70	IWA6035	84.3
	1245	4A	71	IWB12089	84.9
	1246	4A	72	IWA1521	85.9
	1247	4A	73	IWB64647	95.2
	1248	4A	74	IWB2658	96.1
	1249	4A	75	IWA2816	99.6
	1250	4A	76	IWB28476	99.8
	1251	4A	77	IWB41527	100.4
	1252	4A	78	IWB45924	100.7
	1253	4A	79	IWB9710	102.2
	1254	4A	80	IWB61756	114.2
	1255	4A	81	IWB51174	115
	1256	4A	82	IWB65599	116.8
	1257	4A	83	IWB73029	117.8
	1258	4A	84	IWB53635	120.8
	1259	4A	85	IWB41760	121
	1260	4A	86	IWB41853	122.4
	1261	4A	87	IWB24186	122.4
	1262	4A	88	IWB44927	123.9
	1263	4A	89	IWB10782	131.1
	1264	4A	90	IWB11799	131.2
	1265	4A	91	IWB64871	132.8
	1266	4A	92	IWB8919	138.8
	1267	4A	93	IWB68148	138.8
	1268	4A	94	IWB1522	138.9
	1269	4A	95	IWB57948	140.6
	1270	4A	96	IWB67740	141.9
	1271	4A	97	IWB22898	142.3
	1272	4A	98	IWB69836	142.4
	1273	4A	99	IWB62189	143.5
	1274	4A	100	IWB7370	144.2
	1275	4A	101	IWB2177	145.1
	1276	4A	102	IWB53457	145.3
	1277	4A	103	IWB11149	145.4
	1278	4A	104	IWB63966	146.6
	1279	4A	105	IWB46132	146.8
	1280	4B	1	IWB6329	0
	1281	4B	2	IWA3317	0.1
	1282	4B	3	IWB70794	3.6
	1283	4B	4	IWB72348	3.7
	1284	4B	5	IWB12274	4.4
	1285	4B	6	IWB28274	4.5
	1286	4B	7	IWB63893	12.1
	1287	4B	8	IWB28069	14.2
	1288	4B	9	IWB45064	15.6
	1289	4B	10	IWB73354	17.3
	1290	4B	11	IWB74172	17.4
	1291	4B	12	IWA4662	25.4
	1292	4B	13	IWB73001	28.8
	1293	4B	14	IWB56078	31.5
	1294	4B	15	IWB6839	32.2
	1295	4B	16	IWB35611	32.9
	1296	4B	17	IWA4854	33.5
	1297	4B	18	IWB27677	34.5
	1298	4B	19	IWB22991	35.1
	1299	4B	20	IWB52927	36.9
	1300	4B	21	IWB3391	36.9
	1301	4B	22	IWB53540	37.7
	1302	4B	23	IWA7752	41.5
	1303	4B	24	IWB26975	41.9
	1304	4B	25	IWB50753	43.7
	1305	4B	26	IWB17082	45.3
	1306	4B	27	IWB5827	45.6
	1307	4B	28	IWB73894	45.8
	1308	4B	29	IWB35851	45.9
	1309	4B	30	IWB2135	46.9
	1310	4B	31	IWB70938	47
	1311	4B	32	IWB23338	48
	1312	4B	33	IWB7973	48.1
	1313	4B	34	IWB58865	48.4
	1314	4B	35	IWB42264	49.5
	1315	4B	36	IWB1998	49.6
	1316	4B	37	IWB3117	50.2
	1317	4B	38	IWB47105	50.6
	1318	4B	39	IWB74077	50.7
	1319	4B	40	IWA7566	52
	1320	4B	41	IWA3040	55.6
	1321	4B	42	IWB20754	60.2
	1322	4B	43	IWB26862	63.1
	1323	4B	44	IWB42022	65.8
	1324	4B	45	IWB5989	67.4
	1325	4B	46	IWB10640	67.5
	1326	4B	47	IWB9240	67.6
	1327	4B	48	IWB74188	69.3
	1328	4B	49	IWB47460	70.8
	1329	4B	50	IWB58741	71.1
	1330	4B	51	IWA565	74.6
	1331	4B	52	IWB8229	75.3
	1332	4B	53	IWA5358	75.4
	1333	4B	54	IWB25718	76.2
	1334	4B	55	IWB51352	77.6
	1335	4B	56	IWB54805	79
	1336	4B	57	IWB32863	79.1
	1337	4B	58	IWB6021	81.1
	1338	4B	59	IWB73486	81.2
	1339	4B	60	IWB73485	81.3
	1340	4B	61	IWB10235	83
	1341	4B	62	IWB6477	83.1
	1342	4B	63	IWB54404	83.2
	1343	4B	64	IWB63199	84.4
	1344	4B	65	IWA2087	89.3
	1345	4D	1	IWA4200	0
	1346	4D	2	IWB8050	7.9
	1347	4D	3	IWA5381	12.7
	1348	4D	4	IWA6277	15.5
	1349	4D	5	IWB14984	16.3
	1350	4D	6	IWA161	16.6
	1351	4D	7	IWB16260	17
	1352	4D	8	IWB11897	17.1
	1353	4D	9	IWB42351	17.2
	1354	4D	10	IWB24179	19.7
	1355	4D	11	IWB1427	31.6
	1356	4D	12	IWA3471	32.4
	1357	4D	13	IWB2883	33.6
	1358	4D	14	IWB32981	49.5
	1359	4D	15	IWB55110	53.6
	1360	4D	16	IWB5736	55
	1361	4D	17	IWB50454	56.2
	1362	4D	18	IWA2470	56.4
	1363	4D	19	IWB67498	56.9
	1364	4D	20	IWB13079	57.3
	1365	5A	1	IWB1784	0
	1366	5A	2	IWB30060	1.7
	1367	5A	3	IWB5856	3.4
	1368	5A	4	IWB6912	3.7
	1369	5A	5	IWB60191	4.3
	1370	5A	6	IWB67703	7.7
	1371	5A	7	IWA4325	7.8
	1372	5A	8	IWA1569	9.4
	1373	5A	9	IWB11068	10.9
	1374	5A	10	IWA7303	13.7
	1375	5A	11	IWB64449	14.1
	1376	5A	12	IWB602	17
	1377	5A	13	IWB31441	17.6
	1378	5A	14	IWB59634	17.7
	1379	5A	15	IWB22285	18.1
	1380	5A	16	IWB9955	20.2
	1381	5A	17	IWB46908	20.6
	1382	5A	18	IWB14839	21.7
	1383	5A	19	IWB3091	21.8
	1384	5A	20	IWB38074	27.9
	1385	5A	21	IWB34821	28
	1386	5A	22	IWB21817	30.4
	1387	5A	23	IWA7623	31.2
	1388	5A	24	IWA1697	31.3
	1389	5A	25	IWB3903	32.7
	1390	5A	26	IWA324	33.7
	1391	5A	27	IWB4800	36.1
	1392	5A	28	IWB4824	36.2
	1393	5A	29	IWA6415	36.9
	1394	5A	30	IWB61543	37.2
	1395	5A	31	IWB20588	38.6
	1396	5A	32	IWB2909	39.3
	1397	5A	33	IWB53725	40.7
	1398	5A	34	IWA7961	41.8
	1399	5A	35	IWA1988	42.8
	1400	5A	36	IWA3975	43.2
	1401	5A	37	IWB59122	43.4
	1402	5A	38	IWB3298	45.8
	1403	5A	39	IWB57612	48.2
	1404	5A	40	IWB54141	49.6
	1405	5A	41	IWB73065	50
	1406	5A	42	IWB8340	50.6
	1407	5A	43	IWB71919	50.7
	1408	5A	44	IWA5528	50.9
	1409	5A	45	IWB66385	52.1
	1410	5A	46	IWB7956	53.9
	1411	5A	47	IWA6837	55.1
	1412	5A	48	IWA2101	55.2
	1413	5A	49	IWA8308	55.9
	1414	5A	50	IWB74982	58.3
	1415	5A	51	IWA5726	58.6
	1416	5A	52	IWB22536	60.2
	1417	5A	53	IWB43493	61
	1418	5A	54	IWB5759	61.3
	1419	5A	55	IWB60841	61.7
	1420	5A	56	IWB8823	63.3
	1421	5A	57	IWB11226	63.6
	1422	5A	58	IWA7773	63.7
	1423	5A	59	IWB41765	64.1
	1424	5A	60	IWB6959	64.4
	1425	5A	61	IWA3283	66
	1426	5A	62	IWB35613	66.2
	1427	5A	63	IWB50348	68.2
	1428	5A	64	IWB67358	68.5
	1429	5A	65	IWB36245	68.6
	1430	5A	66	IWB53912	70.1
	1431	5A	67	IWB57494	71.6
	1432	5A	68	IWA6949	72
	1433	5A	69	IWA3079	72.1
	1434	5A	70	IWB7544	72.7
	1435	5A	71	IWB22035	72.8
	1436	5A	72	IWB35000	73.8
	1437	5A	73	IWB4568	74.2
	1438	5A	74	IWB33327	74.3
	1439	5A	75	IWB66091	74.7
	1440	5A	76	IWA7405	76
	1441	5A	77	IWB59214	77.4
	1442	5A	78	IWB50162	78.2
	1443	5A	79	IWB9126	78.5
	1444	5A	80	IWB56521	78.9
	1445	5A	81	IWB25638	86.3
	1446	5A	82	IWB7726	89.3
	1447	5A	83	IWB33301	93.7
	1448	5A	84	IWB71983	94.9
	1449	5A	85	IWB59853	95
	1450	5A	86	IWB8905	96.3
	1451	5A	87	IWB71521	100.1
	1452	5A	88	IWB3131	100.2
	1453	5A	89	IWB62132	100.3
	1454	5A	90	IWA7833	101.2
	1455	5A	91	IWB72737	101.3
	1456	5A	92	IWB72736	102.5
	1457	5A	93	IWB20688	103.7
	1458	5A	94	IWB20356	104.8
	1459	5A	95	IWB42241	106.3
	1460	5A	96	IWB9564	107.1
	1461	5A	97	IWB9678	108.4
	1462	5A	98	IWA5288	108.9
	1463	5A	99	IWA7553	109.6
	1464	5A	100	IWB33488	110
	1465	5A	101	IWA6681	110.1
	1466	5A	102	IWA1439	111.3
	1467	5A	103	IWB50070	111.5
	1468	5A	104	IWB3694	113.1
	1469	5A	105	IWB74624	114.2
	1470	5A	106	IWB34563	115
	1471	5A	107	IWB72497	115.2
	1472	5A	108	IWA2657	120.8
	1473	5A	109	IWB63075	120.9
	1474	5A	110	IWA4449	121.2
	1475	5A	111	IWB27510	121.6
	1476	5A	112	IWB71757	121.8
	1477	5A	113	IWB4190	121.9
	1478	5A	114	IWB74800	122.1
	1479	5A	115	IWB12135	122.4
	1480	5A	116	IWB61923	123.1
	1481	5A	117	IWA7911	123.2
	1482	5A	118	IWA4394	124.1
	1483	5A	119	IWB52008	124.4
	1484	5A	120	IWB38320	124.5
	1485	5A	121	IWB27060	125.1
	1486	5A	122	IWB69620	125.8
	1487	5A	123	IWB1041	126.1
	1488	5A	124	IWB72362	126.4
	1489	5A	125	IWB9970	131.1
	1490	5A	126	IWA7044	131.3
	1491	5A	127	IWA3705	131.7
	1492	5A	128	IWB21044	131.8
	1493	5A	129	IWB62176	131.9
	1494	5A	130	IWB5457	132
	1495	5A	131	IWB29406	132.5
	1496	5A	132	IWA1258	137.4
	1497	5A	133	IWB12226	141.2
	1498	5A	134	IWB48788	141.7
	1499	5A	135	IWB68078	142.4
	1500	5A	136	IWB64718	146.1
	1501	5A	137	IWB21632	154.9
	1502	5A	138	IWB51696	155
	1503	5A	139	IWA5929	155.3
	1504	5A	140	IWA4223	156.4
	1505	5A	141	IWB27941	157.8
	1506	5A	142	IWB48095	159
	1507	5A	143	IWA7568	159.5
	1508	5A	144	IWB990	160.6
	1509	5A	145	IWB5368	164.8
	1510	5A	146	IWA5002	167.7
	1511	5A	147	IWA2947	168.8
	1512	5A	148	IWB9855	171.3
	1513	5A	149	IWB44264	171.7
	1514	5A	150	IWB74922	172.3
	1515	5A	151	IWB24570	172.4
	1516	5A	152	IWB73574	173
	1517	5A	153	IWB60644	173.2
	1518	5A	154	IWB51435	176.6
	1519	5A	155	IWB49135	177.8
	1520	5A	156	IWA2558	177.9
	1521	5A	157	IWA2645	178
	1522	5A	158	IWB38410	178.4
	1523	5B	1	IWB64852	0
	1524	5B	2	IWB75279	1
	1525	5B	3	IWB10201	1.1
	1526	5B	4	IWB8814	1.2
	1527	5B	5	IWB141	2.3
	1528	5B	6	IWB64633	3.5
	1529	5B	7	IWB9243	3.6
	1530	5B	8	IWB5398	3.9
	1531	5B	9	IWA4790	4.8
	1532	5B	10	IWB35324	6.7
	1533	5B	11	IWB15048	6.9
	1534	5B	12	IWB73825	7
	1535	5B	13	IWB56396	7.8
	1536	5B	14	IWB69077	10.5
	1537	5B	15	IWB56891	10.6
	1538	5B	16	IWB71492	10.7
	1539	5B	17	IWB66121	10.9
	1540	5B	18	IWB28660	12.1
	1541	5B	19	IWB6416	12.4
	1542	5B	20	IWB63643	13.6
	1543	5B	21	IWB8553	14.7
	1544	5B	22	IWB26650	15.6
	1545	5B	23	IWA3033	15.8
	1546	5B	24	IWB54368	22.6
	1547	5B	25	IWB35827	23.9
	1548	5B	26	IWA1965	24.2
	1549	5B	27	IWB3333	24.6
	1550	5B	28	IWB65389	24.9
	1551	5B	29	IWB2242	25.2
	1552	5B	30	IWA8378	25.5
	1553	5B	31	IWB26156	25.8
	1554	5B	32	IWB33253	26.5
	1555	5B	33	IWB65517	26.8
	1556	5B	34	IWA2003	26.9
	1557	5B	35	IWB45983	27.9
	1558	5B	36	IWB23402	28
	1559	5B	37	IWB71672	29.3
	1560	5B	38	IWB51330	29.6
	1561	5B	39	IWB73671	29.7
	1562	5B	40	IWB27185	30.9
	1563	5B	41	IWB24356	31.3
	1564	5B	42	IWB65647	31.7
	1565	5B	43	IWA8603	32
	1566	5B	44	IWB41534	33.4
	1567	5B	45	IWB55844	34.7
	1568	5B	46	IWB70817	35.2
	1569	5B	47	IWA4533	35.8
	1570	5B	48	IWB36033	36.5
	1571	5B	49	IWB2292	36.8
	1572	5B	50	IWB40644	37.1
	1573	5B	51	IWB21608	37.4
	1574	5B	52	IWB44988	39.2
	1575	5B	53	IWB51175	39.5
	1576	5B	54	IWA2536	39.8
	1577	5B	55	IWB47848	40.2
	1578	5B	56	IWB56834	40.6
	1579	5B	57	IWB53234	40.9
	1580	5B	58	IWB51909	41.7
	1581	5B	59	IWB51911	42.9
	1582	5B	60	IWB65869	43.2
	1583	5B	61	IWB44663	43.8
	1584	5B	62	IWB30056	44.4
	1585	5B	63	IWB45894	44.5
	1586	5B	64	IWB36525	46.5
	1587	5B	65	IWB13599	47.2
	1588	5B	66	IWA987	48.5
	1589	5B	67	IWB52934	48.9
	1590	5B	68	IWB9729	49
	1591	5B	69	IWB12924	52
	1592	5B	70	IWB51264	53.4
	1593	5B	71	IWB57067	55.4
	1594	5B	72	IWB11817	58.7
	1595	5B	73	IWB56752	59.3
	1596	5B	74	IWB38230	60.4
	1597	5B	75	IWB34313	60.8
	1598	5B	76	IWB30911	61.1
	1599	5B	77	IWB43679	61.4
	1600	5B	78	IWA6721	61.7
	1601	5B	79	IWB65455	62.3
	1602	5B	80	IWB65694	63.5
	1603	5B	81	IWB73335	63.9
	1604	5B	82	IWB46400	65.4
	1605	5B	83	IWB33362	66.7
	1606	5B	84	IWB59598	69.3
	1607	5B	85	IWB57214	70.1
	1608	5B	86	IWB55478	72.2
	1609	5B	87	IWB5476	73.5
	1610	5B	88	IWB8906	74.9
	1611	5B	89	IWB10135	75
	1612	5B	90	IWB67811	76
	1613	5B	91	IWB69760	76.1
	1614	5B	92	IWB12416	76.3
	1615	5B	93	IWB28982	77.3
	1616	5B	94	IWA7732	83.7
	1617	5B	95	IWB65012	84.2
	1618	5B	96	IWB75021	85.2
	1619	5B	97	IWB25123	86.1
	1620	5B	98	IWB65348	86.2
	1621	5B	99	IWB72281	94.9
	1622	5B	100	IWA1591	95.3
	1623	5B	101	IWB73165	95.4
	1624	5B	102	IWB71825	95.5
	1625	5B	103	IWB71849	95.6
	1626	5B	104	IWB62177	96.4
	1627	5B	105	IWB73687	97.2
	1628	5B	106	IWB3699	98.5
	1629	5B	107	IWA4182	99.9
	1630	5B	108	IWB74826	101.2
	1631	5B	109	IWB5765	102.7
	1632	5B	110	IWA7585	102.8
	1633	5B	111	IWB22266	103.2
	1634	5B	112	IWB33134	103.3
	1635	5B	113	IWB68985	103.3
	1636	5B	114	IWB9413	103.4
	1637	5B	115	IWB6823	103.5
	1638	5B	116	IWB42961	103.6
	1639	5B	117	IWB33084	103.7
	1640	5B	118	IWB12143	104.1
	1641	5B	119	IWB7080	104.4
	1642	5B	120	IWB9753	104.5
	1643	5B	121	IWB71831	105.4
	1644	5B	122	IWB71748	117.5
	1645	5B	123	IWB35817	119.1
	1646	5B	124	IWB42751	120.5
	1647	5B	125	IWB54873	124.4
	1648	5B	126	IWB2049	125.7
	1649	5B	127	IWB7719	125.8
	1650	5B	128	IWA6211	126
	1651	5B	129	IWA6713	126.1
	1652	5B	130	IWB35477	126.2
	1653	5B	131	IWB36204	128
	1654	5B	132	IWA22	128.3
	1655	5B	133	IWB67752	134.1
	1656	5B	134	IWB4136	134.6
	1657	5B	135	IWB26744	140.6
	1658	5B	136	IWB72715	142.1
	1659	5B	137	IWB45652	144.4
	1660	5B	138	IWB71271	144.5
	1661	5B	139	IWB39285	146.7
	1662	5B	140	IWB29176	149
	1663	5B	141	IWB73829	149.7
	1664	5B	142	IWB2417	149.9
	1665	5B	143	IWB24987	152
	1666	5B	144	IWA2682	153.5
	1667	5D	1	IWB18196	0
	1668	5D	2	IWB4317	16.8
	1669	5D	3	IWA5812	17.7
	1670	5D	4	IWB71674	18.7
	1671	5D	5	IWB50554	19.5
	1672	5D	6	IWB7900	24
	1673	5D	7	IWB107	25.5
	1674	5D	8	IWB44302	31.3
	1675	5D	9	IWA1681	38.7
	1676	5D	10	IWB51648	56.2
	1677	5D	11	IWB34532	59.3
	1678	5D	12	IWA2771	61.1
	1679	5D	13	IWB25501	62
	1680	5D	14	IWB9347	74.6
	1681	5D	15	IWB1101	77.1
	1682	5D	16	IWB10112	83.3
	1683	5D	17	IWB10111	86.1
	1684	5D	18	IWA5532	100.2
	1685	5D	19	IWA2821	100.7
	1686	5D	20	IWB18919	101
	1687	5D	21	IWA7071	101.1
	1688	5D	22	IWB51126	101.5
	1689	5D	23	IWB58475	101.7
	1690	5D	24	IWB56960	102
	1691	5D	25	IWB8663	102.1
	1692	5D	26	IWB24648	102.5
	1693	5D	27	IWB54292	112.4
	1694	6A	1	IWB2886	0
	1695	6A	2	IWA7913	0.6
	1696	6A	3	IWB7814	1
	1697	6A	4	IWA5572	1.1
	1698	6A	5	IWB9013	1.2
	1699	6A	6	IWB11802	1.7
	1700	6A	7	IWB60891	1.8
	1701	6A	8	IWB26185	2.4
	1702	6A	9	IWA7467	2.7
	1703	6A	10	IWB5029	5.5
	1704	6A	11	IWB67413	5.7
	1705	6A	12	IWB7996	7.3
	1706	6A	13	IWB57460	7.4
	1707	6A	14	IWB8844	7.7
	1708	6A	15	IWB29624	8.1
	1709	6A	16	IWA51	9.2
	1710	6A	17	IWB2817	9.9
	1711	6A	18	IWB51731	10.4
	1712	6A	19	IWB547	10.8
	1713	6A	20	IWB22140	11.7
	1714	6A	21	IWB44864	11.7
	1715	6A	22	IWB55531	11.9
	1716	6A	23	IWB6535	12.1
	1717	6A	24	IWB42042	12.3
	1718	6A	25	IWB41952	12.3
	1719	6A	26	IWA6692	12.4
	1720	6A	27	IWA6388	12.5
	1721	6A	28	IWA6390	12.5
	1722	6A	29	IWA4961	12.5
	1723	6A	30	IWB57414	12.5
	1724	6A	31	IWB2542	22.9
	1725	6A	32	IWB33735	23
	1726	6A	33	IWB56945	23.2
	1727	6A	34	IWA3321	30.9
	1728	6A	35	IWA3322	30.9
	1729	6A	36	IWB39323	32
	1730	6A	37	IWB73400	33.6
	1731	6A	38	IWB12244	36.7
	1732	6A	39	IWA233	38.8
	1733	6A	40	IWB58592	40.3
	1734	6A	41	IWB1759	40.7
	1735	6A	42	IWB68613	41.5
	1736	6A	43	IWB1120	42.1
	1737	6A	44	IWA1276	42.9
	1738	6A	45	IWB14307	43
	1739	6A	46	IWB73616	43.3
	1740	6A	47	IWB61658	44.8
	1741	6A	48	IWB33626	44.9
	1742	6A	49	IWB62261	48.1
	1743	6A	50	IWA5466	48.4
	1744	6A	51	IWB46525	48.8
	1745	6A	52	IWB29484	52.9
	1746	6A	53	IWB48922	54.2
	1747	6A	54	IWA6820	55.2
	1748	6A	55	IWB25475	55.6
	1749	6A	56	IWB69307	55.7
	1750	6A	57	IWB6717	56.1
	1751	6A	58	IWB35333	56.5
	1752	6A	59	IWB35849	56.9
	1753	6A	60	IWB51739	57.5
	1754	6A	61	IWA8306	58.5
	1755	6A	62	IWB39171	59.8
	1756	6A	63	IWA428	61.8
	1757	6A	64	IWB1926	66.6
	1758	6A	65	IWB42164	66.7
	1759	6A	66	IWB45178	66.8
	1760	6A	67	IWB10695	67.1
	1761	6A	68	IWB60244	67.4
	1762	6A	69	IWB7681	67.5
	1763	6A	70	IWA3269	67.9
	1764	6A	71	IWB34914	68.3
	1765	6A	72	IWA8264	69.5
	1766	6A	73	IWB43368	69.9
	1767	6A	74	IWB36794	70.4
	1768	6A	75	IWB9001	71.6
	1769	6A	76	IWB4259	71.9
	1770	6A	77	IWB7855	72
	1771	6A	78	IWA6550	75.8
	1772	6A	79	IWB9616	79.2
	1773	6A	80	IWA5523	79.2
	1774	6A	81	IWB24380	80.5
	1775	6A	82	IWB22858	80.5
	1776	6A	83	IWB21617	84.3
	1777	6A	84	IWB24222	107.2
	1778	6A	85	IWB5823	108.2
	1779	6A	86	IWB31101	108.7
	1780	6A	87	IWA7764	109.3
	1781	6A	88	IWB50538	112.9
	1782	6A	89	IWB63000	113
	1783	6A	90	IWB12203	113.1
	1784	6A	91	IWB53006	113.2
	1785	6A	92	IWB69637	113.3
	1786	6A	93	IWB35886	114.6
	1787	6A	94	IWB72189	115
	1788	6A	95	IWB33743	115.1
	1789	6A	96	IWB11953	115.2
	1790	6A	97	IWB27608	115.6
	1791	6A	98	IWA5964	116.8
	1792	6A	99	IWB29652	117.2
	1793	6A	100	IWB67660	117.6
	1794	6A	101	IWB29063	117.7
	1795	6A	102	IWB29924	117.8
	1796	6A	103	IWA3202	117.9
	1797	6A	104	IWB46594	119.5
	1798	6A	105	IWB47326	120.3
	1799	6A	106	IWB55267	121.9
	1800	6A	107	IWB73185	122.4
	1801	6A	108	IWB35061	122.9
	1802	6A	109	IWB9641	123.2
	1803	6A	110	IWB11125	123.3
	1804	6A	111	IWB14716	123.9
	1805	6A	112	IWB48493	124
	1806	6A	113	IWB11445	124.3
	1807	6A	114	IWB54354	124.6
	1808	6B	1	IWB67339	0
	1809	6B	2	IWB33554	0
	1810	6B	3	IWA3297	0.1
	1811	6B	4	IWB13715	0.4
	1812	6B	5	IWB61175	0.6
	1813	6B	6	IWB71435	1.4
	1814	6B	7	IWA969	2.6
	1815	6B	8	IWB29542	2.8
	1816	6B	9	IWB10612	3
	1817	6B	10	IWB72767	3.1
	1818	6B	11	IWB11198	3.7
	1819	6B	12	IWB39456	4.2
	1820	6B	13	IWB72321	5.6
	1821	6B	14	IWB59730	10.1
	1822	6B	15	IWB35378	11.5
	1823	6B	16	IWB43243	12.2
	1824	6B	17	IWB49223	12.3
	1825	6B	18	IWB10969	13.6
	1826	6B	19	IWB12590	14.3
	1827	6B	20	IWA7841	16.9
	1828	6B	21	IWA5943	17.3
	1829	6B	22	IWB44749	20.3
	1830	6B	23	IWB72046	21.5
	1831	6B	24	IWB65635	22
	1832	6B	25	IWB7667	22.4
	1833	6B	26	IWB31788	23.7
	1834	6B	27	IWB21500	23.8
	1835	6B	28	IWB7468	25.9
	1836	6B	29	IWA622	33.1
	1837	6B	30	IWB20087	33.4
	1838	6B	31	IWB10351	33.5
	1839	6B	32	IWB27924	35.3
	1840	6B	33	IWB65961	36.3
	1841	6B	34	IWB46848	37.7
	1842	6B	35	IWA4408	39.6
	1843	6B	36	IWB13004	40.2
	1844	6B	37	IWA842	40.9
	1845	6B	38	IWB45665	41.6
	1846	6B	39	IWB45887	41.7
	1847	6B	40	IWB45612	41.8
	1848	6B	41	IWB42576	42.8
	1849	6B	42	IWB33795	43.8
	1850	6B	43	IWB62381	44.4
	1851	6B	44	IWB20486	45.3
	1852	6B	45	IWB9751	45.6
	1853	6B	46	IWB12024	46
	1854	6B	47	IWA6071	46.1
	1855	6B	48	IWB44230	46.4
	1856	6B	49	IWB39117	46.8
	1857	6B	50	IWB71394	47.1
	1858	6B	51	IWA1657	47.7
	1859	6B	52	IWB11556	48.1
	1860	6B	53	IWA4484	54.9
	1861	6B	54	IWB59754	56.8
	1862	6B	55	IWA8191	56.8
	1863	6B	56	IWA4170	58.4
	1864	6B	57	IWA5104	58.4
	1865	6B	58	IWA997	60.9
	1866	6B	59	IWA3312	63.4
	1867	6B	60	IWB68061	63.5
	1868	6B	61	IWA5722	66.5
	1869	6B	62	IWB66344	66.5
	1870	6B	63	IWB50447	66.9
	1871	6B	64	IWB68811	67.2
	1872	6B	65	IWB68828	69
	1873	6B	66	IWB13435	69.3
	1874	6B	67	IWB67439	69.4
	1875	6B	68	IWA7886	70.4
	1876	6B	69	IWB71759	70.5
	1877	6B	70	IWB71758	70.6
	1878	6B	71	IWB64564	71.6
	1879	6B	72	IWB51283	71.8
	1880	6B	73	IWB22393	72.2
	1881	6B	74	IWB28183	73.7
	1882	6B	75	IWB35654	75.4
	1883	6B	76	IWB50999	75.5
	1884	6B	77	IWB35433	76.4
	1885	6B	78	IWB37048	76.8
	1886	6B	79	IWB70635	76.9
	1887	6B	80	IWB6601	78.7
	1888	6B	81	IWA7974	79.3
	1889	6B	82	IWB73969	79.8
	1890	6B	83	IWB190	80.2
	1891	6B	84	IWB59064	80.3
	1892	6B	85	IWB54010	80.8
	1893	6B	86	IWB8710	81.7
	1894	6B	87	IWA6064	82.1
	1895	6B	88	IWB59066	82.7
	1896	6B	89	IWB73179	83
	1897	6B	90	IWB47820	83.1
	1898	6B	91	IWB75217	83.2
	1899	6B	92	IWA3450	83.3
	1900	6B	93	IWB55954	83.4
	1901	6B	94	IWB31271	83.8
	1902	6B	95	IWB71760	84.8
	1903	6B	96	IWB71761	85
	1904	6B	97	IWB34580	85.1
	1905	6B	98	IWB71762	85.2
	1906	6B	99	IWB23748	85.4
	1907	6B	100	IWB73914	86
	1908	6B	101	IWB33815	86
	1909	6B	102	IWB61094	86.2
	1910	6B	103	IWA1531	86.5
	1911	6B	104	IWB66598	86.8
	1912	6B	105	IWB2367	87.8
	1913	6B	106	IWA1267	88.4
	1914	6B	107	IWB34994	88.5
	1915	6B	108	IWB11471	90.4
	1916	6B	109	IWB72452	90.9
	1917	6B	110	IWB13094	92.3
	1918	6B	111	IWB27834	94.2
	1919	6B	112	IWB53835	94.8
	1920	6B	113	IWA3221	95.7
	1921	6B	114	IWB33781	95.8
	1922	6B	115	IWB906	95.9
	1923	6B	116	IWB46771	96
	1924	6B	117	IWB51320	96.5
	1925	6B	118	IWB73091	96.6
	1926	6B	119	IWB10697	96.8
	1927	6B	120	IWB74080	96.9
	1928	6B	121	IWB45036	97.2
	1929	6B	122	IWB28805	97.3
	1930	6B	123	IWB9975	97.4
	1931	6B	124	IWB28829	97.8
	1932	6B	125	IWB45803	97.9
	1933	6B	126	IWB60708	98.6
	1934	6B	127	IWA5666	99.7
	1935	6B	128	IWA4868	102.2
	1936	6B	129	IWB49568	102.2
	1937	6B	130	IWB51603	104
	1938	6B	131	IWB8526	104
	1939	6B	132	IWB53907	105.8
	1940	6B	133	IWB57608	106.1
	1941	6B	134	IWB38333	110.3
	1942	6B	135	IWB28251	111.3
	1943	6B	136	IWB33786	125.2
	1944	6B	137	IWB49047	126.2
	1945	6B	138	IWB44067	140.9
	1946	6B	139	IWB19435	142.7
	1947	6B	140	IWB24756	147.2
	1948	6B	141	IWA1868	148.2
	1949	6B	142	IWB28256	152.7
	1950	6B	143	IWB42114	165.3
	1951	6B	144	IWA4567	165.5
	1952	6B	145	IWB3527	165.6
	1953	6B	146	IWB41221	165.7
	1954	6B	147	IWB60950	165.8
	1955	6B	148	IWB55705	166.9
	1956	6B	149	IWB4870	167.5
	1957	6B	150	IWB28018	167.8
	1958	6B	151	IWB10420	176.6
	1959	6B	152	IWB40587	177.6
	1960	6B	153	IWB28938	177.7
	1961	6B	154	IWB13533	178
	1962	6B	155	IWB24757	178.9
	1963	6B	156	IWB27573	179.5
	1964	6B	157	IWB35697	180.1
	1965	6D	1	cfd49	0
	1966	6D	2	IWB57567	2
	1967	6D	3	IWB48184	2.6
	1968	6D	4	IWB14587	3.6
	1969	6D	5	IWB2426	3.9
	1970	6D	6	IWB59594	4.5
	1971	6D	7	IWB43408	4.6
	1972	6D	8	IWB54243	4.9
	1973	6D	9	IWB18020	7.1
	1974	6D	10	IWB17793	7.7
	1975	6D	11	barc173	8.3
	1976	6D	12	IWB74251	8.6
	1977	6D	13	IWB16407	9.5
	1978	6D	14	IWB75262	9.8
	1979	6D	15	barc183	12.3
	1980	6D	16	cfd75	16.1
	1981	6D	17	gdm132_2	18
	1982	6D	18	gpw5176	24
	1983	6D	19	cfd42	24.9
	1984	6D	20	IWB55904	28.2
	1985	6D	21	IWB47753	28.2
	1986	6D	22	IWB30444	36.5
	1987	6D	23	IWB43928	37.7
	1988	6D	24	IWB12899	41
	1989	6D	25	IWB26275	45.4
	1990	6D	26	gpw4440	45.7
	1991	6D	27	IWB69688	47.7
	1992	6D	28	barc196	49.5
	1993	6D	29	IWB25192	51.3
	1994	6D	30	IWB19199	55.6
	1995	6D	31	wmc469	58.2
	1996	6D	32	wmc753	58.3
	1997	6D	33	cfd76	58.8
	1998	6D	34	IWB43171	59.6
[truncated: 400 more rows]
