# Supplementary material for: Identification and Validation of a Major Quantitative Trait Locus for Adult Plant Resistance Against Leaf Rust From the Chinese Wheat Landrace Bai Qimai
Source: Front Plant Sci. 2022 May 18;13:812002. doi: 10.3389/fpls.2022.812002 (PMC9158542; doi:10.3389/fpls.2022.812002)
Supplement: Supplementary file 4 [file Table_4.XLSX]

## Sheet: Table S4
	Supplementary Table 4 | Leaf rust severities of the selected F2:3 family groups from the RL6058 × Bai Qimai cross. Group 1 plants were positive for both cfd188 and cssfr5 (representing QLr.cau-6DL + Lr34), Group 2 plants were positive for cfd188 and negative for cssfr5 (QLr.cau-6DL), Group 3 plants were negative for cfd188 and positive for cssfr5 (Lr34), and Group 4 plants were negative for both …
	Parental line /QTL group a	cfd188 b (QLr.cau-6DL)	cssfr5b (Lr34)	Designation of F2:3 family	Replication	Greenhouse c		Field d
						Severity		Severity_1st	Severity_2nd	Severity_3rd	AUDPC e
								May, 25	June, 4	June, 14
	Bai Qimai	+	-	.	1	20.4		2.3	17.8	20.8	293.5
					2	18.8		1.9	18.1	19.5	288
					3	20.8		2.5	19.3	21.2	311.5
	RL6058	-	+	.	1	37.6		12.7	22.5	31.8	447.5
					2	34.8		17.2	27.2	34.2	529
					3	36.4		15.4	26.4	36.1	521.5
	Mingxian169	-	-	.	1	87.6		18.7	52.6	88.7	1063
					2	84.4		27.2	57.4	91.3	1166.5
					3	90.3		24.6	55.8	89.5	1128.5
	Group 1	+	+	1	1	4.5		1	3.1	3.4	52.9
					2	6.1		1.1	2.6	4.7	55
					3	11.4		1.2	1.5	3.5	38.6
				2	1	3.4		1.6	2.5	2.6	45.9
					2	3.4		2	2.5	2.6	48.1
					3	5.3		0	0	5	24.9
				3	1	4.1		4.1	4.5	7.7	104
					2	5.1		1.2	2.5	3.9	50.6
					3	5.6		0	0.6	4.3	27.4
				5	1	7.5		1.2	2.1	5.8	56
					2	3.5		1.5	2.4	2.5	44.2
					3	3.5		1	2.3	2.7	41.3
				6	1	5.7		4.3	4.3	4.4	86.5
					2	7.4		4.7	5.3	5.6	104.7
					3	8		0.6	3.8	6.2	71.8
				9	1	7.2		0.6	3.4	5.5	64.3
					2	4.1		3.4	4.3	4.5	82.5
					3	4.2		1.2	2.7	3.3	49.6
				14	1	9.2		1	1.5	5.7	48.7
					2	12		1.8	3.6	7.2	80.8
					3	10		0.5	2.3	7.2	61.4
				15	1	5.4		0	0.9	4.1	29.6
					2	3.5		1.4	2.5	2.7	45.6
					3	3.6		0.8	2.5	2.7	42.7
				43	1	7.4		0.7	3.7	5.5	68.1
					2	6.8		0.8	2.6	5.3	56.4
					3	4.5		3.2	3.9	5.1	80.4
				45	1	12.4		1.2	3.9	7.3	81.4
					2	10.6		1.6	5.2	8.1	100.6
					3	8.4		1.1	1.5	6.5	52.8
				48	1	6.4		1.7	2.5	2.9	47.8
					2	7.4		0.7	3.4	5.5	64.9
					3	8.1		0.4	2.7	6.3	60.5
				49	1	8.2		0.4	2.7	6.2	59.9
					2	5		0	1.4	3.8	33.2
					3	7.6		0	0	5	25
				50	1	7.5		0.4	3.8	5.7	68.4
					2	8.3		0.6	2.2	6.3	56.7
					3	7.7		4.6	5.5	5.9	107.6
				52	1	8.8		1.3	4.9	6.7	89.1
					2	5.3		1.2	2.2	4.1	48.5
					3	9.7		1.3	3	7.5	74
				54	1	11.5		1.3	4.9	8.8	99.4
					2	4.5		5.1	5.2	5.7	105.8
					3	11.6		0.4	1.5	7.9	56.5
				57	1	3.4		0.3	3.2	5.2	59.4
					2	3.5		0.6	1.6	2.7	32.7
					3	3.8		0.3	1.5	2.9	31.2
				58	1	12		1	1.5	7.1	55.3
					2	11		0.5	1.3	8.4	57.5
					3	11.6		1.1	2.5	4.8	54.5
				64	1	4.8		0.4	3.9	5.6	68.8
					2	7		0.5	2.8	5.3	57.1
					3	7.4		1.2	2	5.6	54.1
				67	1	12.1		1.1	2.1	9.1	72
					2	4.9		0.7	1.6	3.7	37.8
					3	7.4		0.4	2.7	5.7	57.3
				70	1	7.1		1.3	4.4	5.4	77.7
					2	9.7		3.8	4.2	10.2	112
					3	6.2		0.7	3.6	4.6	62.6
	Group 2	+	-	11	1	18.9		2.3	14.1	15.7	231.2
					2	26.2		4.5	15.2	25.6	302.6
					3	18.2		4.8	14.9	16.3	254.4
				16	1	24		1.5	8.1	19.8	187.3
					2	22.6		5	17.5	29.5	347.3
					3	25.8		1.7	7.7	19.7	184
				21	1	20		6.4	13.3	18.5	257.6
					2	16.5		5.6	12.9	16.7	240.4
					3	23.1		0.7	15.3	19.2	252.6
				26	1	13.5		3.2	9.6	16.5	194.5
					2	17		3.6	8.7	14	175.1
					3	13		3.1	6.7	10.7	135.9
				28	1	7.3		1.2	6.3	18.6	162
					2	12.5		3.3	13.8	15.3	231.1
					3	11		0	3.2	9	76.9
				32	1	14		4	13.5	14.5	227.6
					2	14		2.1	10.4	18.7	208.2
					3	17		5.5	12.6	14	223.5
				38	1	29.1		5.7	14.6	21.5	282.1
					2	14		5.6	15.7	21.6	292.9
					3	30.1		4	15.9	24.9	303.7
				39	1	15		6.7	11.4	15.1	222.9
					2	21		5.3	12.1	17.4	234.4
					3	18.8		2.3	14.2	18.5	246
				60	1	22.6		0.5	8.5	18.7	180.9
					2	27		0	5.9	19.6	157.2
					3	24		5.1	13.2	15.1	233
				62	1	25.5		0.4	4.8	18.2	141
					2	28.4		0.4	5.3	18.1	145.3
					3	23		1.3	12.2	18.5	221.1
				68	1	17.5		3.2	10.3	14.5	191.6
					2	21		0.5	5.1	17.3	139.8
					3	22.3		2.3	8.5	18.4	188.3
				71	1	35.5		3.5	15.8	29.4	322.5
					2	33.5		2.5	15.7	27.6	307.5
					3	35.8		3.5	15.6	29.6	321.6
				73	1	10		2.1	5.2	8.3	103.9
					2	12		0.5	6.5	8.2	108.3
					3	13.6		0.6	8.3	14.2	156.8
				74	1	23.4		2.2	5.2	14.3	134.4
					2	22.9		1.1	6.9	18.9	169
					3	22		5.8	15.7	22.1	296.3
				75	1	14.8		2.2	5.4	10.3	116.3
					2	18		0	0	15.1	75.4
					3	14.5		1.2	8.5	15.7	169.3
				76	1	30		0.5	5.4	12.1	117.1
					2	23.9		0.4	5.1	19.7	151.7
					3	27		0.3	4.4	19.4	142.7
				77	1	21		3.3	9.1	17.2	193.7
					2	23.3		2.1	9.5	19.4	202.4
					3	27		2.7	8.1	19.2	190.4
				78	1	28.9		2.1	12.5	17.8	224.5
					2	23.5		4.9	15.1	30.1	326.1
					3	25		1.1	8.5	20.5	193.1
				79	1	22.1		0.7	7.8	18.3	172.8
					2	22		1	3.5	16.2	121
					3	20		3.1	12.6	16.5	224.1
				80	1	28.1		1.5	9.2	19.2	195.3
					2	28.5		2.5	8.3	18.7	189.1
					3	28		0.8	7.8	19.6	180.2
	Group 3	-	+	4	1	37.8		1.2	5.8	25.2	189.8
					2	33.8		2.5	13.2	34.1	315
					3	41.2		2.5	10.5	34.9	291.9
				7	1	39.6		17.6	23.4	33.8	490.8
					2	36.2		32.6	38.4	42.2	757.8
					3	32.3		3.5	11.4	27.3	267.9
				12	1	31.8		10.1	17.1	26.6	354.7
					2	23		0	0	6	29.9
					3	31.3		2.4	9.6	26.4	240.1
				13	1	33.7		23.2	35.2	48.5	710.5
					2	18		3.1	12.5	30.7	294.2
					3	32.6		0.5	5.2	22.3	165.9
				19	1	67.8		18.2	34.1	57.4	718.8
					2	63.9		15.7	22.3	46.9	535.9
					3	72.1		2.1	9.1	35.6	279.3
				20	1	53.7		38.7	42.1	47.5	851.9
					2	53.4		46.2	52.1	55.1	1027.4
					3	42.9		35.4	48.5	54.6	934.9
				22	1	36.2		5.1	12.9	30.7	307.8
					2	32.4		3.2	13.6	34.5	324.6
					3	28.5		0	0.4	19.5	101.7
				24	1	24.8		19.7	23.6	40.3	536
					2	28.2		12.6	22.1	33.8	452.9
					3	29.4		1.2	7.8	24.8	208
				25	1	32.7		32.7	43.2	45.6	823.3
					2	24.8		5.2	13.9	26.7	298.7
					3	33.6		0.8	4.5	24.3	170.4
				34	1	33.8		0.5	3.9	16.7	125.1
					2	23		1.5	5.2	14.3	130.8
					3	29.6		0	0.7	16.2	88
				35	1	70.1		11.5	18.8	34.3	416.9
					2	47.8		20.3	25.5	40.5	558.9
					3	68		3.1	13.1	31.2	302.3
				36	1	27.5		2.6	12.5	23.2	254.2
					2	41.5		1.4	8.8	35.2	271.1
					3	30.5		1.5	5.6	15.8	142.7
				37	1	28.4		11.2	18.3	24.1	359.5
					2	40.5		1.7	8.8	34.3	268.1
					3	28.5		9.7	16.1	28.1	350.1
				41	1	32.7		4.2	10.8	27.7	267.5
					2	25.7		12.1	19.8	28.5	401.1
					3	31.5		0.3	4.6	21.7	156
				51	1	26.8		0.5	4.3	22.2	156.6
					2	25.8		1.5	4.8	21.9	165
					3	26.7		1	4.3	21.1	153.5
				56	1	49.3		20.1	26.7	41.7	576.1
					2	25.2		0	0.7	17.2	93
					3	38.7		2.6	7.8	30.8	245
				63	1	27.8		9.7	16.4	33.5	379.9
					2	26.5		2.3	11.5	32.4	288.5
					3	27.6		4.1	12.8	23.4	265.3
				66	1	28.1		2.5	12.5	23.8	256.4
					2	29.1		3.1	11.9	24.5	257
					3	28.8		0.7	8.7	24.4	212.4
				69	1	40.6		3.2	12.8	34.4	316.1
					2	33.1		10.2	17.7	38	418.1
					3	42.8		19.5	24.1	36.3	520
				72	1	45.7		12.1	18.4	38.7	438
					2	72.5		11.4	18.9	38.8	439.9
					3	48.4		18.7	29.3	41	591.3
	Group 4	-	-	8	1	72		46.7	61.4	70.4	1199.4
					2	76		52.7	72.1	91	1439.5
					3	75.5		1.2	8.3	43.5	306.6
				10	1	66		1.4	13.2	57.3	425.3
					2	67		0	9.5	22.8	208.9
					3	68.4		15.1	33.2	59.4	704.3
				17	1	85.9		5.6	23.3	64.4	582.9
					2	80.1		45.7	65.1	75.2	1255.8
					3	69		16.7	33.1	59.8	713.7
				18	1	85		46.3	62.8	73.9	1228.9
					2	81.4		8.1	29.1	67.9	671
					3	86		5.5	22.2	74.8	623.6
				23	1	69.3		5.1	23.1	60.2	557.7
					2	75.6		15.6	34.5	65.8	751.9
					3	66.5		18.7	40.3	67.2	832.4
				27	1	77		20.3	41.1	66.9	846.9
					2	77		5.5	22.3	66.9	585.2
					3	78		28.3	48.9	67.7	969.1
				29	1	86.4		30.9	51.2	75.1	1041.8
					2	71		55.7	61.4	75.6	1270.4
					3	76.2		30.7	53.2	66.1	1015.9
				30	1	93.2		49.3	70.1	80.9	1351.9
					2	58.5		38.1	56.1	74.6	1124.7
					3	90		27.7	50.1	78.1	1029.9
				31	1	91.6		24.4	45.2	70.4	926
					2	90		54.7	63.6	78.6	1302.7
					3	92		14.6	28.8	79.9	760.6
				33	1	89.5		5.4	21.6	72.8	607.1
					2	57		15.8	39.5	65.5	801.3
					3	89.5		23.2	40.2	72.8	881.8
				40	1	57.7		8.3	25.2	50.2	544.3
					2	58		7.9	28.7	50.4	578.7
					3	57.5		9.2	27.7	70.4	675.1
				42	1	58.3		14.8	32.6	58.7	693.3
					2	58.5		1.8	15.7	50.8	420.1
					3	58.6		10.7	27.1	70.3	676
				44	1	58.3		2.1	14.2	52.3	414.2
					2	69.5		2.1	12.5	60.3	437.1
					3	68.3		13.8	32.8	59.2	693.1
				46	1	67		21.3	45.5	58.2	852.7
					2	75		16.1	33.4	67.2	750.7
					3	72		6.2	20.1	62.3	543.6
				47	1	75		4.5	20.8	65.1	555.8
					2	90.5		19.7	41.7	78.8	909.4
					3	76.1		15.8	42.1	66.1	830.3
				53	1	63.4		25.7	45.8	68.7	930.1
					2	89.2		7.1	27.6	71.4	668.4
					3	71		1.3	8.4	48.6	333.4
				55	1	93.2		15.1	30.5	76.4	762.5
					2	90		6.2	25.7	72.2	649
					3	66		21.5	44.5	67.3	889.1
				59	1	90.2		5.7	21.5	73.3	610.2
					2	84		5.3	14.8	62.1	485.1
					3	69.2		10.5	24.4	60.2	597.3
				61	1	93.2		5.5	21.5	73.2	608.4
					2	83.1		4.7	15.8	60.3	483.2
					3	90		15.4	32.1	68.2	739.2
				65	1	68.5		16.8	36.8	66.7	785.3
					2	72		6.1	16.9	62.5	512.1
					3	90		15.8	33.8	70.2	768
