# Supplementary material for: Identification and Validation of a Major Quantitative Trait Locus for Adult Plant Resistance Against Leaf Rust From the Chinese Wheat Landrace Bai Qimai
Source: Front Plant Sci. 2022 May 18;13:812002. doi: 10.3389/fpls.2022.812002 (PMC9158542; doi:10.3389/fpls.2022.812002)
Supplement: Supplementary file 6 [file Table_6.XLSX]

## Sheet: Table S6
	Supplementary Table 6 | Comparison of QLr.cau-6DL with previously reported QTL conferring leaf rust resistance on chromosome 6D.
	QTL	Mapping population		Marker technology	The adjanct marker			Reference
		Type	Size		Name	Sequence	Position (bp) a
	QLr.cimmyt-6DS	RIL	109	SSR, EST-STS	cfd49	Forward promer:5'TGAGTTCTTCTGGTGAGGCA 3'; Reverse promer:5'GAATCGGTTCACAAGGGAAA 3'	1757657	Sukhwinder-Singh et al. (2012) Multi-trait and multi-environment QTL analyses for resistance to wheat diseases.PLoS ONE 7(6): e38008
					cfd42	Forward promer:5'AGGTTCTAGGGGGCATGTCT 3'; Reverse promer:5'GCTCTCAATGACTGCACTGG 3'	23520804
	QLr.IWA2476	AM panel	1032	Illumina 9K SNP	IWA2476	TCCGAGTACGCACCACAAGGCGGATGACGCTGAGGGGCGCGACGAAGACGCTGACAGAGAAGCCAACGCAAACCCACCCAAGCATGACAACGCGCTTCTC[T/G]CCCTCCGACAGGAGCAGGGTGAGGAGGAGGATAAGACCGAACACACCCACATTCAGGAGAAGGAGGATCTTCGCCGTGAAGAGCTTGGCTTGCTTTGGTG	4855564	Turner et al. (2017) Association mapping of leaf rust resistance loci in a spring wheat core collection.Theor Appl Genet 130:345–361
	QLr.wPt-1695	AM panel	205	Array-based DArT	wPt-1695	TGCAGTTGGGACAGCTGGGGGTATACTAGTGGGGGTGAGATATGAGAAATTTGACATTATTTCCAGTAATATGTTCAACTTCTCTGTCTCTTGCATCCTGCTTAGTAAGGTAGACAAACATTTGTGGAGATTCATCTCTGTTTACGGCTCAGCTTACGAAGAGCATAAACTTGAATTTGTTAATGAACTGCACAATGTTATGAACTGCTGGTCCGGTCCAACTTTAATTGGAGGGGACTTTAATTTAGTTAGATCCTCTGAGGATAAAAGTAATGGTATGGTTGACCTGCACTGGGTGGATTTGTTCAATGACTGGATCAACTGTATGAGGTTGGTTGAATTGGTGAACTCTGGTAGAAAGTTCACCTGGGCCAATAATCAGGATAATCTGATCATGAC…	6168339	Bansal et al. (2013) Exploring wheat landraces for rust resistance using a single marker scan. Euphytica 194:219–233
	QLr.B22-6D	BC	250	SSR	gwm469	Forward promer:5' CGATAACCACTCATCCACACC 3'; Reverse promer:5' CAACTCAGTGCTCACACAACG 3'	17257718	Naz et al. (2008) AB-QTL analysis in winter wheat: II. Genetic analysis of seedling and field resistance against leaf rust in a wheat advanced backcross population. Theor Appl Genet 116:1095-1104
	QLrs.B22-6D	BC	250	SSR	cfd132	Forward promer:5'CAAATGCTAATCCCCGCC 3'; Reverse promer:5'TGTAAACAAGGTCGCAGGTG 3'	30795025	Naz et al. (2008) AB-QTL analysis in winter wheat: II. Genetic analysis of seedling and field resistance against leaf rust in a wheat advanced backcross population. Theor Appl Genet 116:1095-1104
	QLr.hebau-6DS	RIL	144	Affymetrix 55K SNP, SSR	AX-108780681	CTACGTAGCAGTTGGTGAGGTTCCAAATTCGACCCANGATGTGTGGTTTGTGTCTAGCCCATTCTACCATTAA	53784915	Zhang et al. (2019) QTL Mapping of Adult-plant Resistance to Leaf and Stripe Rust in Wheat Cross SW 8588/Thatcher using the Wheat 55K SNP Array. Plant Disease 103.12
					AX-86175025	ATGCGATGGCTGTAGACTGATTAACGATCCTAGCACNTTAGCGAGTTGCTTACCCTGCACGCTCAAGCATGC	55736925
	QLr.cdl-6D	RIL	92	Array-based DArT, SSR, KASP	wPt-664670	TGCAGGAGATATTGTCCATGCATTTAGATCTGCAGCTTTACTATGCCCCCAGCATATTTGTGTTTCCCCAAACCATCTTCTTTTCCTGAACCTTTATTTCCCTAATGAACATGATGGCTTATGATTGTGGTAGCCTCGTAAGATTGGTAGAGAACACTATCATGTGAGACACGAAGCCCTCATCCTCACAGAAGGTCAAACTAAATAAGATATGTGGTAGTATGGACGTCAAAGAAGATGCTTAACAGCCAGCAGTCAGGTTGATGTCACTATTATGCGCTCCAACCCCATCGCCGGTGCAACCGGCCATGGGCTCATGCACCTACTGTCTGCATGACCAACCAATTTCAGTTAAGAGCATTGTACAAAAGTAGGCACACATTAGTAGAACAGAAGTGG…	259034794	Kolmer et al. (2018) Adult plant leaf rust resistance derived from the wheat landrace cultivar Americano 44d is conditioned by interaction of three QTL. Euphytica 214:59-69
	QLr.cau-6DL	RIL	186	Illumina 90K SNP, SSR	cfd188	Forward primer: 5'AATGGCTTCACTGTTTGCCT 3'; Reverse primer: 5' AAATGGTCCCAGCATTCAAG 3'	259414212	The present study
					IWB55857	CTTTCCGCATGTCTGCCAGTTGCCTTAGACTGCAACAAGAGCATGCTTGA[T/C]GGGAGAGATGATTCAGAAGAAATTGTTGCACCCTTGTCCATTGCAACAAT	313754095
	QLr.IWB33802	GWAS panel	100	Illumina 15K SNP	IWB33802	CAGCCCCACCATGCCCATGGACAGGATATGCCTGCTCAGCTGCGGCGCCT[T/C]TGCAGGTACCCTTTACTTTGCCCCATGCCCTTCTCCTTCTGAAGCTATAT	328350094	Leonova et al. (2020) Genome-wide association study of leaf rust resistance in Russian spring wheat varieties. BMC Plant Biology 20:135-147
	QLr.IWB18070	GWAS panel	100	Illumina 15K SNP	IWB18070	TTCTTGTGGACGTGTTTTCGATGGATGCACAACCAAATAGAGTGCTTGTGTGGAATGTACGGGGCTTGAACACCCCGGCGAGGAGGACGACCATCTCACAGGTTGTGGTAGCGGCCAAACCATC[A/G]ATAGTTTGCTTTCAGGAGTGGAAGCTTGAAGTTGTATCTCTGGAAGTAATTCGTCACTGCATGGGTAATAGATTTGAGGTACTTTTTTATTTGCCGGCTGTTCGCACGCGTGGCGGCATC	360894636	Leonova et al. (2020) Genome-wide association study of leaf rust resistance in Russian spring wheat varieties. BMC Plant Biology 20:135-147
	QLr.IWB9015	GWAS panel	100	Illumina 15K SNP	IWB9015	ATCATAATAAGTTCAATGTTTGTGCGCAAGAGGGCTGAGGACATGGCAACAGCGGCGAGGATGGTGATGGAGATGGTGGAGAGAGGCTACTTGCCAAGAAG	361185269	Leonova et al. (2020) Genome-wide association study of leaf rust resistance in Russian spring wheat varieties. BMC Plant Biology 20:135-147
	QLr.IWA619	GWAS panel	567	Illumina 9K SNP	IWA619	TCTGTTTTAGAAACTTCACACTGAAAAAAGCATTGCTAGCCTCTTTCCAATGTACTCCCT[C/T]CGATCCATATTACTTGTCGTTGCTTTAGTACAACTTTGTACTGAAGTTGTACTAAAGCAG	405142834	Kertho et al. (2015) Genome-wide association mapping for resistance to leaf and stripe rust in winter-habit hexaploid wheat landraces. Plos One 10(6):e0129580
	QLr.IWA7616	GWAS panel	567	Illumina 9K SNP	IWA7616	TCAGTGTCCTGTGAACGATTATATCAGGATACCTTCGAAGTGGTGAAGTGAAGTGTGTGTACAAAGGGATAGATAGCGCATAATGAGCCCAATCATCCTT[C/T]TTGCTTATCAGGTCCCCTGTGCAGAAGTATTCCGCAGACTGCATTTGCTTTGAAGCATAAAACATGAGAATATCAAACATAACAGGATCATCTTGCAACT	430642660	Kertho et al. (2015) Genome-wide association mapping for resistance to leaf and stripe rust in winter-habit hexaploid wheat landraces. Plos One 10(6):e0129580
	QLr.IWA6181	GWAS panel	159	Illumina 9K SNP	IWA6181	CAACACTTGATGATGTGAAGAAACTTAAATATACTACTCGAGTTATTAACGAATCTTTGAGACTATATCCACAGCCGCCAGTTTTAATTCGCCGCTCCCT[C/T]GAGGATGATATGCTAGGGGAGTACCCGATCGGCAAGGGAGAAGACATTTTTATATCCATCTGGAACCTTCATCGCTGCCCAAAGCATTGGGATGATGCGG	482053882	Kankwatsa et al. (2017) Characterization and genome-wide association mapping of resistance to leaf rust, stem rust and stripe rust in a geographically diverse collection of spring wheat landraces. Molecular Breeding 37(9):113-136
	QLr.IWB505	GWAS panel	100	Illumina 15K SNP	IWB505	CAGTCATCAATAAGATCGGGCCAACTGTGCTCCGGTATGAACAGTTCGTT[T/C]GGTGGTCCATAGACCTTGATGTAATATTTTATTATGTTTGGGGTGCTTTG	492576714	Leonova et al. (2020) Genome-wide association study of leaf rust resistance in Russian spring wheat varieties. BMC Plant Biology 20:135-147
	QLr.IWB10505	GWAS panel	100	Illumina 15K SNP	IWB10505	AGATCGAACGGACCACATTCATCCAAATAGTCATTGATGGGTTGCATTAT[T/G]TTATTCGGACGCAAGTTACCTTCTATTTTCTCACCACCAAGTAAAAATTC	494584503	Leonova et al. (2020) Genome-wide association study of leaf rust resistance in Russian spring wheat varieties. BMC Plant Biology 20:135-147
	a Physical position was inferred by aligning the adjacent marker sequence with IWGSC RefSeq v2.1.
